# Supplementary material
Source: publisher site journal article supplement (https://www.dovepress.com/article/526706)
Supplement: Supplementary file 1 [file 526706%20Supplementary%20Material.docx]

**Integrative network pharmacology and transcriptomics reveal the mechanism of Gui-qi-yi-shen granules in the treatment of IgA nephropathy**

**Supplementary materials**

**Figure S1:** The Herb-compound-target network.

**Table S1:** Identification of chemical constituents from GQYS granules (screening in the positive ion mode).

**Table S2:** Identification of chemical constituents from GQYS granules (screening in the negative ion mode).

**Table S3:** The active compounds and targets of GQYS.

**Table S4:** The targets of IgAN.

**Table S5:** The GQYS–IgAN targets.

**Table S6:** DEG between control and IgAN groups.

**Table S7:** DEG between IgAN and GQYS groups.


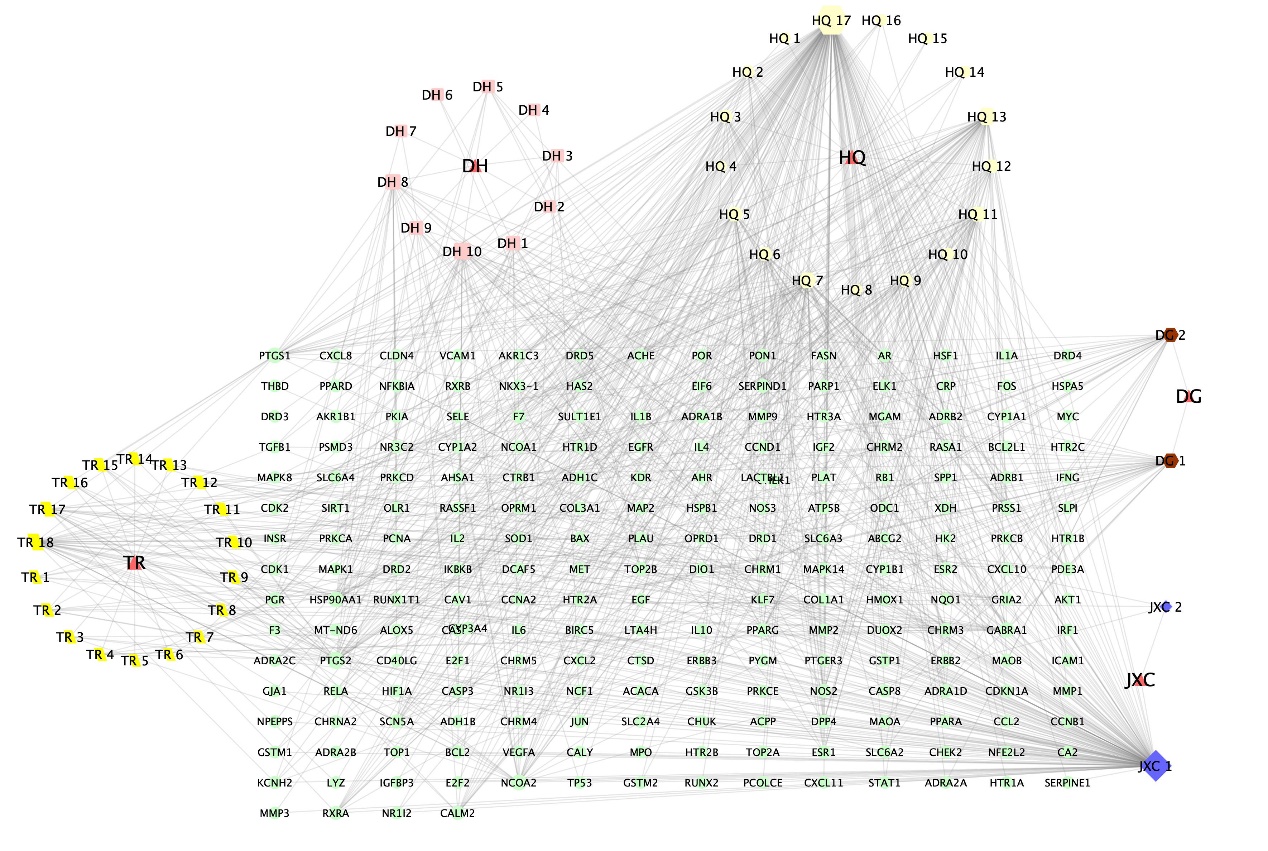


**Figure S1.** The Herb-compound-target network.

| **Table S1.** Identification of chemical constituents from GQYS granules (screening in the positive ion mode) | | | | | | | | |
| --- | --- | --- | --- | --- | --- | --- | --- | --- |
| **No.** | ***t*R(min)** | **Identification** | **Element composition** | **Observed molecular mass (Da)** | **Molecular mass (Da)** | **Error (ppm)** | **Adduct** | **Fragment ions** |
|
| **1#** | 0.72 | arginine | C6H14N4O2 | 175.1188 | 175.119 | -0.8 | [M+H]+ | 158.0942,116.0717,70.0680 |
| **2#** | 0.73 | threonine | C4H9NO3 | 120.0652 | 120.066 | -3.1 | [M+H]+ | 120.0663,74.0617 |
| **3#** | 0.74 | choline | C5H13NO | 104.1068 | 104.107 | -1.8 | [M+H]+ | 60.084 |
| **4#** | 0.75 | glutamic acid | C5H9NO4 | 148.0609 | 148.06 | -3.4 | [M+H]+ | 130.0504,84.0465 |
| **5#** | 0.77 | betaine | C5H11NO2 | 118.086 | 118.086 | -1 | [M+H]+ | 118.0905,59.0766,58.0688 |
| **6#** | 1.19 | adeninepedatisectine B | C5H5N5 | 136.0616 | 136.062 | -1.1 | [M+H]+ | 119.0370,94.0413 |
| **7#** | 1.38 | niacinnicotinic acid | C6H5NO2 | 124.0392 | 124.039 | -1 | [M+H]+ | 78.0344,53.0382 |
| **8#** | 2.19 | uracil | C4H4N2O2 | 113.0344 | 113.035 | -1.5 | [M+H]+ | 96.0080,70.0292 |
| **9#** | 2.52 | leucine | C6H13NO2 | 132.1016 | 132.102 | -1.5 | [M+H]+ | 86.1008,30.0366 |
| **10#** | 2.52 | isoleucine | C6H13NO2 | 132.1016 | 132.102 | -1.5 | [M+H]+ | 86.1008,30.0366 |
| **11#** | 2.86 | gallic acid | C7H6O5 | 171.0295 | 171.029 | -2.4 | [M+H]+ | 153.0177,1127.0389,109.0287 |
| **12** | 4.8 | phenylalanine | C9H11NO2 | 166.086 | 166.086 | -1.3 | [M+H]+ | 131.0501,120.0851,103.0550 |
| **13** | 8.1 | catechin | C15H14O6 | 291.0861 | 291.086 | -0.7 | [M+H]+ | 207.0652,165.0545,139.0393 |
| **14#** | 8.39 | Chlorogenic acid | C16H18O9 | 355.1022 | 355.102 | -0.4 | [M+H]+ | 163.0430,145.0294,117.0343 |
| **15** | 9.03 | amygdalin | C20H27NO11 | 458.1658 | 458.166 | 0.2 | [M+H]+ | 296.1137,163.0597,145.0494 |
| **16** | 10.02 | rheinoside C | C27H30O15 | 595.1671 | 595.166 | 1.2 | [M+H]+ | 577.1564,559.1444,475.1246 |
| **17** | 10.22 | 2,3-dimethylphenol | C8H10O | 23.08 | 123.08 | -1.7 | [M+H]+ | 95.0853,81.9372 |
| **18** | 10.22 | m-ethylphenol | C8H10O | 23.08 | 123.08 | -1.7 | [M+H]+ | 95.0853,81.9372 |
| **19** | 10.23 | 2-methyl-5-carboxymethyl-7-hydroxychromanone | C12H12O5 | 237.0759 | 237.076 | -0.2 | [M+H]+ | 219.0645,193.0496,176.0458 |
| **20#** | 11.55 | ferulic acid | C10H10O4 | 195.0649 | 195.065 | -0.9 | [M+H]+ | 177.0562,145.0315 |
| **21#** | 11.97 | calycosin-7-O-glucoside | C22H22O10 | 447.1287 | 447.129 | 0.5 | [M+H]+ | 285.0817 |
| **22#** | 11.97 | physcion-8-β-D-glucopyranoside | C22H22O10 | 447.1287 | 447.129 | 0.5 | [M+H]+ | 285.0817 |
| **23#** | 12 | kaempferol-3-rhamnoside | C21H20O10 | 433.113 | 433.113 | 0.7 | [M+H]+ | 415.1052,397.0933,313.0699 |
| **24** | 12.09 | isoquercitrinisoquercetrin | C21H20O12 | 465.1034 | 465.103 | 1.3 | [M+H]+ | 303.0543 |
| **25** | 12.09 | quercetin-3-O-glucoside | C21H20O12 | 465.1034 | 465.103 | 1.3 | [M+H]+ | 303.0543 |
| **26** | 12.17 | rhein | C15H8O6 | 285.0394 | 285.039 | 0.3 | [M+H]+ | 241.0508 |
| **27** | 12.24 | camphoric acid | C10H16O4 | 201.1113 | 201.112 | -4.2 | [M+H]+ | 155.1055,109.1003 |
| **28** | 12.94 | kaempferol | C15H10O6 | 287.055 | 287.055 | 0 | [M+H]+ | 269.1774,207.0984,111.1125 |
| **29#** | 13.01 | 1-O-galloyl-6-O-cinnamoylβ-D-glucose | C21H20O11 | 449.1079 | 449.108 | 0.2 | [M+H]+ | 287.0563 |
| **30#** | 13.26 | rhein-8-O-glucoside | C21H18O11 | 447.0925 | 447.092 | 0.3 | [M+H]+ | 271.0604 |
| **31** | 14.43 | formononetin-7-glucoside | C22H22O9 | 431.1338 | 431.134 | 0.3 | [M+H]+ | 269.0862 |
| **32#** | 15.47 | calycosin | C16H12O5 | 285.0756 | 285.076 | -0.5 | [M+H]+ | 270.0540,225.0572 |
| **33** | 15.74 | chryaophanol | C15H10O4 | 255.0651 | 255.065 | -0.3 | [M+H]+ | 149.0240,129.0694,100.0770 |
| **34** | 15.82 | asiaticoside | C48H78O19 | 959.5215 | 959.521 | 0.4 | [M+H]+ | 798.4707,453.3351,309.1182 |
| **35** | 15.82 | madecassoside | C48H78O19 | 959.5212 | 959.521 | 0.4 | [M+H]+ | 798.4707,453.3351,309.1182 |
| **36** | 15.82 | madasiatic acid | C30H48O5 | 489.3574 | 489.357 | -0.6 | [M+H]+ | 453.3390,407.3339,205.1596 |
| **37** | 16.25 | 2-methyl-5-acetonyl-7-hydroxychromone | C13H12O4 | 233.0802 | 233.081 | -2.1 | [M+H]+ | 189.0905,174.0672 |
| **38** | 16.5 | procyanidin B1 | C30H26O12 | 579.1498 | 579.15 | 0.5 | [M+H]+ | 543.1340,525.1194,482.1020 |
| **39** | 16.5 | procyanidin B2 | C30H26O12 | 579.1498 | 579.15 | 0.5 | [M+H]+ | 543.1340,525.1194,482.1020 |
| **40** | 16.5 | procyanidin B3 | C30H26O12 | 579.1498 | 579.15 | 0.5 | [M+H]+ | 543.1340,525.1194,482.1020 |
| **41** | 16.5 | procyanidin B4 | C30H26O12 | 579.1498 | 579.15 | 0.5 | [M+H]+ | 543.1340,525.1194,482.1020 |
| **42** | 16.5 | procyanidin B7 | C30H26O12 | 579.1498 | 579.15 | 0.5 | [M+H]+ | 543.1340,525.1194,482.1020 |
| **43** | 16.5 | procyanidin B2-3'-O-gallate | C30H26O12 | 579.1498 | 579.15 | 0.5 | [M+H]+ | 543.1340,525.1194,482.1020 |
| **44** | 16.5 | proanthocyanidin B1 | C30H26O12 | 579.1498 | 579.15 | 0.5 | [M+H]+ | 543.1340,525.1194,482.1020 |
| **45** | 16.5 | proanthocyanidin B3 | C30H26O12 | 579.1498 | 579.15 | 0.5 | [M+H]+ | 543.1340,525.1194,482.1020 |
| **46** | 16.5 | procyanidin B7 | C30H26O12 | 579.1498 | 579.15 | 0.5 | [M+H]+ | 543.1340,525.1194,482.1020 |
| **47** | 17.21 | astragalosideⅤ | C47H78O19 | 947.5214 | 947.521 | 0.2 | [M+H]+ | 455.3473,143.1059 |
| **48** | 17.21 | astragalosideⅥ | C47H78O19 | 947.5214 | 947.521 | 0.2 | [M+H]+ | 455.3473,143.1059 |
| **49** | 18.12 | butylidenephthalide | C12H12O2 | 189.0909 | 189.091 | -0.4 | [M+H]+ | 147.0445,133.0305 |
| **50** | 18.23 | formononetin | C16H12O4 | 269.0808 | 269.081 | 0.2 | [M+H]+ | 213.0904,118.0420 |
| **51** | 18.23 | biochain B | C16H12O4 | 269.0808 | 269.081 | 0.2 | [M+H]+ | 213.0904,118.0420 |
| **52** | 18.33 | ligustilide | C12H14O2 | 191.1064 | 191.107 | -1.1 | [M+H]+ | 149.0595,79.0547 |
| **53** | 18.94 | asiatic acid | C30H48O6 | 505.3522 | 505.352 | -0.3 | [M+H]+ | 469.3315,393.3159,173.1321 |
| **54** | 18.94 | brahmic acid | C30H48O6 | 505.3522 | 505.352 | -0.3 | [M+H]+ | 469.3315,393.3159,173.1321 |
| **55** | 19.09 | astragalosideⅢ | C41H68O14 | 785.4673 | 785.468 | -0.9 | [M+H]+ | 605.4027,587.3905,143.1069 |
| **56** | 19.09 | astragalosideⅣ | C41H68O14 | 785.4673 | 785.468 | -0.9 | [M+H]+ | 605.4027,587.3905,143.1069 |
| **57** | 19.93 | astragalosideⅧ | C47H76O17 | 913.5154 | 913.516 | -0.3 | [M+H]+ | 230.2475,203.1793,221.1898 |
| **58#** | 19.99 | IsoyasaponinI | C48H78O18 | 943.5259 | 943.526 | -0.2 | [M+H]+ | 797.4666,635.4173,441.3695,423.3613 |
| **59** | 20.13 | IIisoastragalosideII | C43H70O15 | 827.4784 | 827.479 | -0.3 | [M+H]+ | 629.4020,473.3591,143.1066 |
| **60** | 23.47 | angelicide | C24H28O4 | 381.2058 | 381.206 | -0.5 | [M+H]+ | 353.1728,191.1063 |
| **61** | 26.93 | phthalic anhydride | C8H4O3 | 149.0259 | 149.023 | -0.8 | [M+H]+ | 121.0307,93.0338 |

Compounds with # have been matched with existing secondary mass spectrometry libraries.

| **Table S2.** Identification of chemical constituents from GQYS granules (screening in the negative ion mode) | | | | | | | | |
| --- | --- | --- | --- | --- | --- | --- | --- | --- |
| **No.** | ***t*R(min)** | **Identification** | **Element composition** | **Observed molecular mass (Da)** | **Molecular mass (Da)** | **Error (ppm)** | **Adduct** | **Fragment ions** |
|
| **62#** | 0.74 | aspartic acid | C4H7NO4 | 132.0297 | 132.03 | -4.2 | [M-H]- | 88.0410,71.0131 |
| **63#** | 0.74 | asparagine | C4H8N2O3 | 131.0456 | 131.046 | -3.3 | [M-H]- | 41.9998 |
| **64#** | 0.78 | galacturonic acid | C6H10O7 | 193.0347 | 193.035 | -3.5 | [M-H]- | 103.0044,59.0146 |
| **65#** | 0.78 | glucuronic acid | C6H10O7 | 193.0347 | 193.035 | -3.5 | [M-H]- | 103.0044,59.0146 |
| **66#** | 0.81 | sucrose | C12H22O11 | 341.1086 | 341.109 | -0.8 | [M-H]- | 191.0562,149.0459,59.0149 |
| **67#** | 0.85 | arabinose | C5H10O5 | 149.0451 | 149.046 | -2.9 | [M-H]- | 89.0240,44.9990 |
| **68#** | 0.85 | xylose | C5H10O5 | 149.0451 | 149.046 | -2.9 | [M-H]- | 89.0240,44.9990 |
| **69#** | 1.33 | succinic acid | C4H6O4 | 117.0193 | 117.019 | -0.6 | [M-H]- | 99.9273,73.0299 |
| **70#** | 1.37 | gallic acid | C7H6O5 | 169.0145 | 169.014 | 1.9 | [M-H]- | 125.0259,79.0201 |
| **12*#** | 1.41 | phenylalanine | C9H11NO2 | 164.0718 | 164.072 | 0.7 | [M-H]- | 147.0466,103.0573,72.0101 |
| **71#** | 1.55 | 3-caffeoylquinic acid | C16H18O9 | 353.0886 | 353.088 | 2.4 | [M-H]- | 191.0623,179.0385,135.0533 |
| **72#** | 1.55 | 5'-caffeoylquinic acid | C16H18O9 | 353.0886 | 353.088 | 2.4 | [M-H]- | 191.0623,179.0385,135.0533 |
| **14*#** | 1.55 | chlorogenic acid | C16H18O9 | 353.0886 | 353.088 | 2.4 | [M-H]- | 191.0623,179.0385,135.0533 |
| **75#** | 6.95 | phenol | C6H6O | 93.0352 | 93.035 | 2.8 | [M-H]- | 41.004 |
| **76** | 7.08 | anisic acid | C8H8O3 | 151.0408 | 151.04 | 2.8 | [M-H]- | 151.0392,107.0511,77.0410 |
| **77** | 7.08 | vanillin | C8H8O3 | 151.0408 | 151.04 | 2.8 | [M-H]- | 151.0392,107.0511,77.0410 |
| **13*#** | 7.62 | catechin | C15H14O6 | 289.0722 | 289.072 | 0.9 | [M-H]- | 245.0818,203.0720,123.0462 |
| **15*** | 8.46 | amygdalin | C20H27NO11 | 456.1519 | 456.151 | 0.2 | [M-H]- | 323.0978,263.1769,125.0255 |
| **9*** | 9.64 | leucine | C6H13NO2 | 130.0864 | 130.087 | 2.5 | [M-H]- | 61.9919 |
| **10*** | 9.64 | isoleucine | C6H13NO2 | 130.0864 | 130.087 | 2.5 | [M-H]- | 61.9919 |
| **16*#** | 9.73 | rheinoside C | C27H30O15 | 593.1509 | 593.151 | -0.5 | [M-H]- | 473.1084,383.0755,353.0651 |
| **78#** | 9.73 | rheinoside D | C27H30O15 | 593.1509 | 593.151 | -0.5 | [M-H]- | 473.1084,383.0755,353.0651 |
| **79** | 10.38 | rhamnocitrin-3-O-glucoside | C22H22O11 | 461.1075 | 461.109 | -1.1 | [M-H]- | 299.0574,284.0335 |
| **80#** | 11.8 | rheinoside A | C27H30O16 | 609.1455 | 609.146 | -1.3 | [M-H]- | 549.1603,463.0878,377.1821 |
| **81#** | 12.09 | glucoaurantio-obtusin3-glucosylquercetin | C21H20O12 | 463.0861 | 463.088 | 0.4 | [M-H]- | 300.0284,271.0246,151.0042 |
| **25*#** | 12.09 | quercetin-3-O-glucosidequercetin-3-O-glucoside | C21H20O12 | 463.0861 | 463.088 | 0.4 | [M-H]- | 300.0284,271.0246,151.0042 |
| **82#** | 12.09 | isoquercitrinisoquercetrin | C21H20O12 | 463.0861 | 463.088 | 0.4 | [M-H]- | 300.0284,271.0246,151.0042 |
| **26*#** | 12.15 | rhein | C15H8O6 | 283.025 | 283.025 | 1.4 | [M-H]- | 239.0347,211.0398,183.0448 |
| **83#** | 13.09 | 1-O-galloyl-6-O-cinnamoylβ-D-glucose | C21H20O11 | 447.0942 | 447.093 | -0.2 | [M-H]- | 284.0330,255.0316,227.0351 |
| **84#** | 13.52 | azelaic acid | C9H16O4 | 187.0983 | 187.098 | 3.5 | [M-H]- | 159.0428,141.8896,41.0022 |
| **85#** | 13.52 | anchoic acid | C9H16O4 | 187.0983 | 187.098 | 3.5 | [M-H]- | 159.0428,141.8896,41.0022 |
| **86#** | 14.65 | 7,2'-dihydroxy-3',4'-dimethoxyisoflavone-7-O-β-D-glucoside | C23H24O11 | 475.1248 | 475.125 | 0.4 | [M-H]- | 267.0679,252.0436,44.9997 |
| **27*** | 14.87 | camphoric acid | C10H16O4 | 199.0977 | 199.098 | 0.8 | [M-H]- | 155.1082,69.0370 |
| **20*#** | 15.53 | ferulic acid | C10H10O4 | 193.0509 | 193.051 | 3 | [M-H]- | 148.9005,134.0383 |
| **32*#** | 15.84 | calycosin | C16H12O5 | 283.0619 | 283.061 | 2.6 | [M-H]- | 268.0448,211.0425,195.0466 |
| **87#** | 15.84 | asparamide | C16H12O5 | 283.0619 | 283.061 | 2.6 | [M-H]- | 268.0448,211.0425,195.0466 |
| **88#** | 15.84 | physcion | C16H12O5 | 283.0619 | 283.061 | 2.6 | [M-H]- | 268.0448,211.0425,195.0466 |
| **33*#** | 16.16 | chryaophanol | C15H10O4 | 253.0506 | 253.051 | -0.1 | [M-H]- | 225.0557 |
| **89#** | 16.16 | chrysophanic acid | C15H10O4 | 253.0506 | 253.051 | -0.1 | [M-H]- | 225.0557 |
| **34*** | 16.35 | asiaticoside | C48H78O19 | 957.5032 | 957.506 | -3.2 | [M-H]- | 488.3434,469.1608,247.0827 |
| **35*** | 16.35 | madecassoside | C48H78O19 | 957.5032 | 957.506 | -3.2 | [M-H]- | 488.3434,469.1608,247.0827 |
| **90#** | 17.28 | kaempferol3,5,7,4'-tetrahydroxyflavone-3-rhamnoglucoside3,5,7,4'-tetrahydroxyflavone | C15H10O6 | 285.0426 | 285.04 | 0.2 | [M-H]- | 239.0352,185.0616,143.0510 |
| **28*#** | 17.28 | kaempferol | C15H10O6 | 285.0426 | 285.04 | 0.2 | [M-H]- | 39.0352,185.0616,143.0510 |
| **47*** | 17.96 | astragalosideⅤ | C47H78O19 | 945.5006 | 945.506 | -2.7 | [M-H]- | 783.4465 |
| **48*** | 17.96 | astragalosideⅥ | C47H78O19 | 945.5006 | 945.506 | -2.7 | [M-H]- | 783.4465 |
| **50*#** | 19.01 | formononetin | C16H12O4 | 267.0674 | 267.066 | 0.8 | [M-H]- | 252.0469,223.0416,195.0465 |
| **51*#** | 19.01 | biochain B | C16H12O4 | 267.0674 | 267.066 | 0.8 | [M-H]- | 252.0469,223.0416,195.0465 |
| **57*** | 21.21 | astragalosideⅧ | C47H76O17 | 911.4988 | 911.501 | -2.6 | [M-H]- | 652.4472,589.6411 |
| **55*** | 20.33 | astragalosideⅢ | C41H68O14 | 783.4529 | 783.454 | -3.7 | [M-H]- | 489.3585,161.0448 |
| **56*** | 20.33 | astragalosideⅣ | C41H68O14 | 783.4529 | 783.454 | -3.7 | [M-H]- | 489.3585,161.0448 |
| **91#** | 31.31 | linoleic acid | C18H32O2 | 279.2332 | 279.233 | 1.6 | [M-H]- | 261.2218,196.2218 |

Compounds with # have been matched with existing secondary mass spectrometry libraries, and compounds with * are those detected in both positive and negative ion modes in Table S1 and Table S2.

| **Table S3.** The active compounds and targets of GQYS | | | |
| --- | --- | --- | --- |
| **No.** | **Herb name** | **Mol ID** | **Target name** |
| 1 | Jixuecao | MOL000098 | PTGS1 |
| 2 | Jixuecao | MOL000098 | AR |
| 3 | Jixuecao | MOL000098 | PPARG |
| 4 | Jixuecao | MOL000098 | PTGS2 |
| 5 | Jixuecao | MOL000098 | HSP90AA1 |
| 6 | Jixuecao | MOL000098 | NCOA2 |
| 7 | Jixuecao | MOL000098 | DPP4 |
| 8 | Jixuecao | MOL000098 | AKR1B1 |
| 9 | Jixuecao | MOL000098 | PRSS1 |
| 10 | Jixuecao | MOL000098 | TOP2B |
| 11 | Jixuecao | MOL000098 | SERPIND1 |
| 12 | Jixuecao | MOL000098 | KCNH2 |
| 13 | Jixuecao | MOL000098 | SCN5A |
| 14 | Jixuecao | MOL000098 | F7 |
| 15 | Jixuecao | MOL000098 | ADRB2 |
| 16 | Jixuecao | MOL000098 | MMP3 |
| 17 | Jixuecao | MOL000098 | F7 |
| 18 | Jixuecao | MOL000098 | RXRA |
| 19 | Jixuecao | MOL000098 | ACHE |
| 20 | Jixuecao | MOL000098 | GABRA1 |
| 21 | Jixuecao | MOL000098 | MAOB |
| 22 | Jixuecao | MOL000098 | RELA |
| 23 | Jixuecao | MOL000098 | EGFR |
| 24 | Jixuecao | MOL000098 | AKT1 |
| 25 | Jixuecao | MOL000098 | VEGFA |
| 26 | Jixuecao | MOL000098 | CCND1 |
| 27 | Jixuecao | MOL000098 | BCL2 |
| 28 | Jixuecao | MOL000098 | BCL2L1 |
| 29 | Jixuecao | MOL000098 | FOS |
| 30 | Jixuecao | MOL000098 | CDKN1A |
| 31 | Jixuecao | MOL000098 | EIF6 |
| 32 | Jixuecao | MOL000098 | BAX |
| 33 | Jixuecao | MOL000098 | CASP9 |
| 34 | Jixuecao | MOL000098 | PLAU |
| 35 | Jixuecao | MOL000098 | MMP2 |
| 36 | Jixuecao | MOL000098 | MMP9 |
| 37 | Jixuecao | MOL000098 | MAPK1 |
| 38 | Jixuecao | MOL000098 | IL10 |
| 39 | Jixuecao | MOL000098 | EGF |
| 40 | Jixuecao | MOL000098 | RB1 |
| 41 | Jixuecao | MOL000098 | CD40LG |
| 42 | Jixuecao | MOL000098 | JUN |
| 43 | Jixuecao | MOL000098 | IL6 |
| 44 | Jixuecao | MOL000098 | AHSA1 |
| 45 | Jixuecao | MOL000098 | CASP3 |
| 46 | Jixuecao | MOL000098 | TP53 |
| 47 | Jixuecao | MOL000098 | ELK1 |
| 48 | Jixuecao | MOL000098 | NFKBIA |
| 49 | Jixuecao | MOL000098 | POR |
| 50 | Jixuecao | MOL000098 | ODC1 |
| 51 | Jixuecao | MOL000098 | XDH |
| 52 | Jixuecao | MOL000098 | CASP8 |
| 53 | Jixuecao | MOL000098 | TOP1 |
| 54 | Jixuecao | MOL000098 | SOD1 |
| 55 | Jixuecao | MOL000098 | PRKCA |
| 56 | Jixuecao | MOL000098 | MMP1 |
| 57 | Jixuecao | MOL000098 | HIF1A |
| 58 | Jixuecao | MOL000098 | STAT1 |
| 59 | Jixuecao | MOL000098 | RUNX1T1 |
| 60 | Jixuecao | MOL000098 | CDK1 |
| 61 | Jixuecao | MOL000098 | HSPA5 |
| 62 | Jixuecao | MOL000098 | ERBB2 |
| 63 | Jixuecao | MOL000098 | PPARG |
| 64 | Jixuecao | MOL000098 | ACACA |
| 65 | Jixuecao | MOL000098 | HMOX1 |
| 66 | Jixuecao | MOL000098 | CYP3A4 |
| 67 | Jixuecao | MOL000098 | CYP1A2 |
| 68 | Jixuecao | MOL000098 | CAV1 |
| 69 | Jixuecao | MOL000098 | MYC |
| 70 | Jixuecao | MOL000098 | F3 |
| 71 | Jixuecao | MOL000098 | GJA1 |
| 72 | Jixuecao | MOL000098 | CYP1A1 |
| 73 | Jixuecao | MOL000098 | ICAM1 |
| 74 | Jixuecao | MOL000098 | IL1B |
| 75 | Jixuecao | MOL000098 | CCL2 |
| 76 | Jixuecao | MOL000098 | SELE |
| 77 | Jixuecao | MOL000098 | VCAM1 |
| 78 | Jixuecao | MOL000098 | PTGER3 |
| 79 | Jixuecao | MOL000098 | CXCL8 |
| 80 | Jixuecao | MOL000098 | PRKCB |
| 81 | Jixuecao | MOL000098 | BIRC5 |
| 82 | Jixuecao | MOL000098 | DUOX2 |
| 83 | Jixuecao | MOL000098 | NOS3 |
| 84 | Jixuecao | MOL000098 | HSPB1 |
| 85 | Jixuecao | MOL000098 | TGFB1 |
| 86 | Jixuecao | MOL000098 | SULT1E1 |
| 87 | Jixuecao | MOL000098 | MGAM |
| 88 | Jixuecao | MOL000098 | IL2 |
| 89 | Jixuecao | MOL000098 | NR1I2 |
| 90 | Jixuecao | MOL000098 | CYP1B1 |
| 91 | Jixuecao | MOL000098 | CCNB1 |
| 92 | Jixuecao | MOL000098 | PLAT |
| 93 | Jixuecao | MOL000098 | THBD |
| 94 | Jixuecao | MOL000098 | SERPINE1 |
| 95 | Jixuecao | MOL000098 | COL1A1 |
| 96 | Jixuecao | MOL000098 | IFNG |
| 97 | Jixuecao | MOL000098 | ALOX5 |
| 98 | Jixuecao | MOL000098 | IL1A |
| 99 | Jixuecao | MOL000098 | MPO |
| 100 | Jixuecao | MOL000098 | TOP2A |
| 101 | Jixuecao | MOL000098 | NCF1 |
| 102 | Jixuecao | MOL000098 | ABCG2 |
| 103 | Jixuecao | MOL000098 | HAS2 |
| 104 | Jixuecao | MOL000098 | GSTP1 |
| 105 | Jixuecao | MOL000098 | NFE2L2 |
| 106 | Jixuecao | MOL000098 | NQO1 |
| 107 | Jixuecao | MOL000098 | PARP1 |
| 108 | Jixuecao | MOL000098 | AHR |
| 109 | Jixuecao | MOL000098 | PSMD3 |
| 110 | Jixuecao | MOL000098 | SLC2A4 |
| 111 | Jixuecao | MOL000098 | COL3A1 |
| 112 | Jixuecao | MOL000098 | CXCL11 |
| 113 | Jixuecao | MOL000098 | CXCL2 |
| 114 | Jixuecao | MOL000098 | DCAF5 |
| 115 | Jixuecao | MOL000098 | NR1I3 |
| 116 | Jixuecao | MOL000098 | CHEK2 |
| 117 | Jixuecao | MOL000098 | INSR |
| 118 | Jixuecao | MOL000098 | CLDN4 |
| 119 | Jixuecao | MOL000098 | PPARA |
| 120 | Jixuecao | MOL000098 | PPARD |
| 121 | Jixuecao | MOL000098 | HSF1 |
| 122 | Jixuecao | MOL000098 | CRP |
| 123 | Jixuecao | MOL000098 | CXCL10 |
| 124 | Jixuecao | MOL000098 | CHUK |
| 125 | Jixuecao | MOL000098 | SPP1 |
| 126 | Jixuecao | MOL000098 | RUNX2 |
| 127 | Jixuecao | MOL000098 | RASSF1 |
| 128 | Jixuecao | MOL000098 | E2F1 |
| 129 | Jixuecao | MOL000098 | E2F2 |
| 130 | Jixuecao | MOL000098 | ACPP |
| 131 | Jixuecao | MOL000098 | CTSD |
| 132 | Jixuecao | MOL000098 | IGFBP3 |
| 133 | Jixuecao | MOL000098 | IGF2 |
| 134 | Jixuecao | MOL000098 | CD40LG |
| 135 | Jixuecao | MOL000098 | IRF1 |
| 136 | Jixuecao | MOL000098 | ERBB3 |
| 137 | Jixuecao | MOL000098 | PON1 |
| 138 | Jixuecao | MOL000098 | DIO1 |
| 139 | Jixuecao | MOL000098 | PCOLCE |
| 140 | Jixuecao | MOL000098 | NPEPPS |
| 141 | Jixuecao | MOL000098 | HK2 |
| 142 | Jixuecao | MOL000098 | NKX3-1 |
| 143 | Jixuecao | MOL000098 | RASA1 |
| 144 | Jixuecao | MOL000098 | GSTM1 |
| 145 | Jixuecao | MOL000098 | GSTM2 |
| 146 | Jixuecao | MOL000359 | PGR |
| 147 | Jixuecao | MOL000359 | NCOA2 |
| 148 | Jixuecao | MOL000359 | NR3C2 |
| 149 | HuangQi | MOL000211 | PGR |
| 150 | HuangQi | MOL000239 | NOS2 |
| 151 | HuangQi | MOL000239 | PTGS1 |
| 152 | HuangQi | MOL000239 | AR |
| 153 | HuangQi | MOL000239 | SCN5A |
| 154 | HuangQi | MOL000239 | PTGS2 |
| 155 | HuangQi | MOL000239 | ESR2 |
| 156 | HuangQi | MOL000239 | DPP4 |
| 157 | HuangQi | MOL000239 | HSP90AA1 |
| 158 | HuangQi | MOL000239 | CDK2 |
| 159 | HuangQi | MOL000239 | CHEK1 |
| 160 | HuangQi | MOL000239 | PRSS1 |
| 161 | HuangQi | MOL000239 | NCOA2 |
| 162 | HuangQi | MOL000239 | CALM2 |
| 163 | HuangQi | MOL000296 | PGR |
| 164 | HuangQi | MOL000296 | NCOA2 |
| 165 | HuangQi | MOL000296 | CHRM3 |
| 166 | HuangQi | MOL000296 | CHRM1 |
| 167 | HuangQi | MOL000296 | CHRM2 |
| 168 | HuangQi | MOL000296 | ADRA1B |
| 169 | HuangQi | MOL000296 | GABRA1 |
| 170 | HuangQi | MOL000296 | GRIA2 |
| 171 | HuangQi | MOL000296 | ADH1B |
| 172 | HuangQi | MOL000296 | ADH1C |
| 173 | HuangQi | MOL000296 | LYZ |
| 174 | HuangQi | MOL000296 | PTGS1 |
| 175 | HuangQi | MOL000296 | SCN5A |
| 176 | HuangQi | MOL000296 | PTGS2 |
| 177 | HuangQi | MOL000296 | RXRA |
| 178 | HuangQi | MOL000296 | PDE3A |
| 179 | HuangQi | MOL000296 | SLC6A2 |
| 180 | HuangQi | MOL000033 | PGR |
| 181 | HuangQi | MOL000354 | NOS2 |
| 182 | HuangQi | MOL000354 | PTGS1 |
| 183 | HuangQi | MOL000354 | ESR1 |
| 184 | HuangQi | MOL000354 | AR |
| 185 | HuangQi | MOL000354 | PPARG |
| 186 | HuangQi | MOL000354 | PTGS2 |
| 187 | HuangQi | MOL000354 | ESR2 |
| 188 | HuangQi | MOL000354 | DPP4 |
| 189 | HuangQi | MOL000354 | MAPK14 |
| 190 | HuangQi | MOL000354 | GSK3B |
| 191 | HuangQi | MOL000354 | HSP90AA1 |
| 192 | HuangQi | MOL000354 | CDK2 |
| 193 | HuangQi | MOL000354 | PRSS1 |
| 194 | HuangQi | MOL000354 | CCNA2 |
| 195 | HuangQi | MOL000354 | NCOA2 |
| 196 | HuangQi | MOL000354 | CALM2 |
| 197 | HuangQi | MOL000354 | PYGM |
| 198 | HuangQi | MOL000354 | PPARD |
| 199 | HuangQi | MOL000354 | CHEK1 |
| 200 | HuangQi | MOL000354 | AKR1B1 |
| 201 | HuangQi | MOL000354 | NCOA1 |
| 202 | HuangQi | MOL000354 | F7 |
| 203 | HuangQi | MOL000354 | SERPIND1 |
| 204 | HuangQi | MOL000354 | ACHE |
| 205 | HuangQi | MOL000354 | GABRA1 |
| 206 | HuangQi | MOL000354 | MAOB |
| 207 | HuangQi | MOL000354 | GRIA2 |
| 208 | HuangQi | MOL000354 | RELA |
| 209 | HuangQi | MOL000354 | XDH |
| 210 | HuangQi | MOL000354 | NCF1 |
| 211 | HuangQi | MOL000354 | OLR1 |
| 212 | HuangQi | MOL000371 | NOS2 |
| 213 | HuangQi | MOL000371 | PTGS1 |
| 214 | HuangQi | MOL000371 | CHRM3 |
| 215 | HuangQi | MOL000371 | SERPIND1 |
| 216 | HuangQi | MOL000371 | CHRM1 |
| 217 | HuangQi | MOL000371 | ESR1 |
| 218 | HuangQi | MOL000371 | ADRB1 |
| 219 | HuangQi | MOL000371 | SCN5A |
| 220 | HuangQi | MOL000371 | PTGS2 |
| 221 | HuangQi | MOL000371 | HTR3A |
| 222 | HuangQi | MOL000371 | ADRA2C |
| 223 | HuangQi | MOL000371 | RXRA |
| 224 | HuangQi | MOL000371 | ACHE |
| 225 | HuangQi | MOL000371 | PDE3A |
| 226 | HuangQi | MOL000371 | ADRA1B |
| 227 | HuangQi | MOL000371 | ADRB2 |
| 228 | HuangQi | MOL000371 | ADRA1D |
| 229 | HuangQi | MOL000371 | OPRM1 |
| 230 | HuangQi | MOL000371 | GABRA1 |
| 231 | HuangQi | MOL000371 | PRSS1 |
| 232 | HuangQi | MOL000371 | NCOA2 |
| 233 | HuangQi | MOL000371 | CALM2 |
| 234 | HuangQi | MOL000378 | NOS2 |
| 235 | HuangQi | MOL000378 | PTGS1 |
| 236 | HuangQi | MOL000378 | DRD1 |
| 237 | HuangQi | MOL000378 | CHRM3 |
| 238 | HuangQi | MOL000378 | SERPIND1 |
| 239 | HuangQi | MOL000378 | KCNH2 |
| 240 | HuangQi | MOL000378 | CHRM1 |
| 241 | HuangQi | MOL000378 | ESR1 |
| 242 | HuangQi | MOL000378 | AR |
| 243 | HuangQi | MOL000378 | ADRB1 |
| 244 | HuangQi | MOL000378 | SCN5A |
| 245 | HuangQi | MOL000378 | PPARG |
| 246 | HuangQi | MOL000378 | F7 |
| 247 | HuangQi | MOL000378 | CHRM5 |
| 248 | HuangQi | MOL000378 | PTGS2 |
| 249 | HuangQi | MOL000378 | ADRA2C |
| 250 | HuangQi | MOL000378 | CHRM4 |
| 251 | HuangQi | MOL000378 | RXRA |
| 252 | HuangQi | MOL000378 | OPRD1 |
| 253 | HuangQi | MOL000378 | PDE3A |
| 254 | HuangQi | MOL000378 | HTR2A |
| 255 | HuangQi | MOL000378 | ADRA1D |
| 256 | HuangQi | MOL000378 | CHRM2 |
| 257 | HuangQi | MOL000378 | ADRA1B |
| 258 | HuangQi | MOL000378 | SLC6A3 |
| 259 | HuangQi | MOL000378 | ADRB2 |
| 260 | HuangQi | MOL000378 | ADRA1D |
| 261 | HuangQi | MOL000378 | SLC6A4 |
| 262 | HuangQi | MOL000378 | ESR2 |
| 263 | HuangQi | MOL000378 | GABRA1 |
| 264 | HuangQi | MOL000378 | DPP4 |
| 265 | HuangQi | MOL000378 | MAPK14 |
| 266 | HuangQi | MOL000378 | GSK3B |
| 267 | HuangQi | MOL000378 | HSP90AA1 |
| 268 | HuangQi | MOL000378 | CDK2 |
| 269 | HuangQi | MOL000378 | CHEK1 |
| 270 | HuangQi | MOL000378 | RXRB |
| 271 | HuangQi | MOL000378 | PRSS1 |
| 272 | HuangQi | MOL000378 | CCNA2 |
| 273 | HuangQi | MOL000378 | NCOA2 |
| 274 | HuangQi | MOL000378 | CALM2 |
| 275 | HuangQi | MOL000379 | PTGS2 |
| 276 | HuangQi | MOL000379 | TOP2B |
| 277 | HuangQi | MOL000379 | NCOA2 |
| 278 | HuangQi | MOL000380 | NOS2 |
| 279 | HuangQi | MOL000380 | PTGS1 |
| 280 | HuangQi | MOL000380 | CHRM3 |
| 281 | HuangQi | MOL000380 | SERPIND1 |
| 282 | HuangQi | MOL000380 | CHRM1 |
| 283 | HuangQi | MOL000380 | ESR1 |
| 284 | HuangQi | MOL000380 | SCN5A |
| 285 | HuangQi | MOL000380 | PTGS2 |
| 286 | HuangQi | MOL000380 | HTR3A |
| 287 | HuangQi | MOL000380 | RXRA |
| 288 | HuangQi | MOL000380 | ACHE |
| 289 | HuangQi | MOL000380 | ADRA1B |
| 290 | HuangQi | MOL000380 | ADRB2 |
| 291 | HuangQi | MOL000380 | ADRA1D |
| 292 | HuangQi | MOL000380 | GABRA1 |
| 293 | HuangQi | MOL000380 | HSP90AA1 |
| 294 | HuangQi | MOL000380 | PRSS1 |
| 295 | HuangQi | MOL000380 | NCOA2 |
| 296 | HuangQi | MOL000380 | NCOA1 |
| 297 | HuangQi | MOL000380 | CALM2 |
| 298 | HuangQi | MOL000380 | CHRM4 |
| 299 | HuangQi | MOL000387 | PTGS2 |
| 300 | HuangQi | MOL000387 | KDR |
| 301 | HuangQi | MOL000387 | MET |
| 302 | HuangQi | MOL000387 | HSP90AA1 |
| 303 | HuangQi | MOL000387 | PTGS1 |
| 304 | HuangQi | MOL000387 | TOP2B |
| 305 | HuangQi | MOL000392 | NOS2 |
| 306 | HuangQi | MOL000392 | PTGS1 |
| 307 | HuangQi | MOL000392 | CHRM1 |
| 308 | HuangQi | MOL000392 | ESR1 |
| 309 | HuangQi | MOL000392 | AR |
| 310 | HuangQi | MOL000392 | PPARG |
| 311 | HuangQi | MOL000392 | PTGS2 |
| 312 | HuangQi | MOL000392 | RXRA |
| 313 | HuangQi | MOL000392 | PDE3A |
| 314 | HuangQi | MOL000392 | ADRA1D |
| 315 | HuangQi | MOL000392 | SLC6A3 |
| 316 | HuangQi | MOL000392 | ADRB2 |
| 317 | HuangQi | MOL000392 | SLC6A4 |
| 318 | HuangQi | MOL000392 | ESR2 |
| 319 | HuangQi | MOL000392 | DPP4 |
| 320 | HuangQi | MOL000392 | MAPK14 |
| 321 | HuangQi | MOL000392 | GSK3B |
| 322 | HuangQi | MOL000392 | HSP90AA1 |
| 323 | HuangQi | MOL000392 | CDK2 |
| 324 | HuangQi | MOL000392 | MAOB |
| 325 | HuangQi | MOL000392 | CHEK1 |
| 326 | HuangQi | MOL000392 | PRSS1 |
| 327 | HuangQi | MOL000392 | CCNA2 |
| 328 | HuangQi | MOL000392 | CALM2 |
| 329 | HuangQi | MOL000392 | PKIA |
| 330 | HuangQi | MOL000392 | SERPIND1 |
| 331 | HuangQi | MOL000392 | ACHE |
| 332 | HuangQi | MOL000392 | LACTBL1 |
| 333 | HuangQi | MOL000392 | JUN |
| 334 | HuangQi | MOL000392 | PPARG |
| 335 | HuangQi | MOL000392 | IL4 |
| 336 | HuangQi | MOL000392 | SIRT1 |
| 337 | HuangQi | MOL000392 | ATP5B |
| 338 | HuangQi | MOL000392 | MT-ND6 |
| 339 | HuangQi | MOL000417 | NOS2 |
| 340 | HuangQi | MOL000417 | PTGS1 |
| 341 | HuangQi | MOL000417 | ESR1 |
| 342 | HuangQi | MOL000417 | AR |
| 343 | HuangQi | MOL000417 | PPARG |
| 344 | HuangQi | MOL000417 | PTGS2 |
| 345 | HuangQi | MOL000417 | RXRA |
| 346 | HuangQi | MOL000417 | PDE3A |
| 347 | HuangQi | MOL000417 | ESR2 |
| 348 | HuangQi | MOL000417 | DPP4 |
| 349 | HuangQi | MOL000417 | MAPK14 |
| 350 | HuangQi | MOL000417 | GSK3B |
| 351 | HuangQi | MOL000417 | HSP90AA1 |
| 352 | HuangQi | MOL000417 | CDK2 |
| 353 | HuangQi | MOL000417 | CHEK1 |
| 354 | HuangQi | MOL000417 | PRSS1 |
| 355 | HuangQi | MOL000417 | CCNA2 |
| 356 | HuangQi | MOL000417 | NCOA2 |
| 357 | HuangQi | MOL000417 | CALM2 |
| 358 | HuangQi | MOL000417 | ADRB2 |
| 359 | HuangQi | MOL000422 | NOS2 |
| 360 | HuangQi | MOL000422 | PTGS1 |
| 361 | HuangQi | MOL000422 | AR |
| 362 | HuangQi | MOL000422 | PPARG |
| 363 | HuangQi | MOL000422 | PTGS2 |
| 364 | HuangQi | MOL000422 | HSP90AA1 |
| 365 | HuangQi | MOL000422 | NCOA2 |
| 366 | HuangQi | MOL000422 | DPP4 |
| 367 | HuangQi | MOL000422 | PRSS1 |
| 368 | HuangQi | MOL000422 | PGR |
| 369 | HuangQi | MOL000422 | SERPIND1 |
| 370 | HuangQi | MOL000422 | CHRM1 |
| 371 | HuangQi | MOL000422 | ACHE |
| 372 | HuangQi | MOL000422 | SLC6A2 |
| 373 | HuangQi | MOL000422 | CHRM2 |
| 374 | HuangQi | MOL000422 | ADRA1B |
| 375 | HuangQi | MOL000422 | GABRA1 |
| 376 | HuangQi | MOL000422 | TOP2B |
| 377 | HuangQi | MOL000422 | F7 |
| 378 | HuangQi | MOL000422 | CALM2 |
| 379 | HuangQi | MOL000422 | RELA |
| 380 | HuangQi | MOL000422 | IKBKB |
| 381 | HuangQi | MOL000422 | AKT1 |
| 382 | HuangQi | MOL000422 | BCL2 |
| 383 | HuangQi | MOL000422 | BAX |
| 384 | HuangQi | MOL000422 | CD40LG |
| 385 | HuangQi | MOL000422 | JUN |
| 386 | HuangQi | MOL000422 | AHSA1 |
| 387 | HuangQi | MOL000422 | CASP3 |
| 388 | HuangQi | MOL000422 | MAPK8 |
| 389 | HuangQi | MOL000422 | XDH |
| 390 | HuangQi | MOL000422 | MMP1 |
| 391 | HuangQi | MOL000422 | STAT1 |
| 392 | HuangQi | MOL000422 | CDK1 |
| 393 | HuangQi | MOL000422 | PPARG |
| 394 | HuangQi | MOL000422 | HMOX1 |
| 395 | HuangQi | MOL000422 | CYP3A4 |
| 396 | HuangQi | MOL000422 | CYP1A2 |
| 397 | HuangQi | MOL000422 | CYP1A1 |
| 398 | HuangQi | MOL000422 | ICAM1 |
| 399 | HuangQi | MOL000422 | SELE |
| 400 | HuangQi | MOL000422 | VCAM1 |
| 401 | HuangQi | MOL000422 | NR1I2 |
| 402 | HuangQi | MOL000422 | CYP1B1 |
| 403 | HuangQi | MOL000422 | ALOX5 |
| 404 | HuangQi | MOL000422 | HAS2 |
| 405 | HuangQi | MOL000422 | GSTP1 |
| 406 | HuangQi | MOL000422 | AHR |
| 407 | HuangQi | MOL000422 | PSMD3 |
| 408 | HuangQi | MOL000422 | SLC2A4 |
| 409 | HuangQi | MOL000422 | NR1I3 |
| 410 | HuangQi | MOL000422 | INSR |
| 411 | HuangQi | MOL000422 | DIO1 |
| 412 | HuangQi | MOL000422 | GSTM1 |
| 413 | HuangQi | MOL000422 | GSTM2 |
| 414 | HuangQi | MOL000422 | AKR1C3 |
| 415 | HuangQi | MOL000422 | SLPI |
| 416 | HuangQi | MOL000433 | CDK2 |
| 417 | HuangQi | MOL000433 | SERPIND1 |
| 418 | HuangQi | MOL000433 | GSK3B |
| 419 | HuangQi | MOL000439 | TOP2B |
| 420 | HuangQi | MOL000442 | PTGS2 |
| 421 | HuangQi | MOL000442 | RXRA |
| 422 | HuangQi | MOL000442 | HSP90AA1 |
| 423 | HuangQi | MOL000442 | PRSS1 |
| 424 | HuangQi | MOL000098 | PTGS1 |
| 425 | HuangQi | MOL000098 | AR |
| 426 | HuangQi | MOL000098 | PPARG |
| 427 | HuangQi | MOL000098 | PTGS2 |
| 428 | HuangQi | MOL000098 | HSP90AA1 |
| 429 | HuangQi | MOL000098 | NCOA2 |
| 430 | HuangQi | MOL000098 | DPP4 |
| 431 | HuangQi | MOL000098 | AKR1B1 |
| 432 | HuangQi | MOL000098 | PRSS1 |
| 433 | HuangQi | MOL000098 | TOP2B |
| 434 | HuangQi | MOL000098 | SERPIND1 |
| 435 | HuangQi | MOL000098 | KCNH2 |
| 436 | HuangQi | MOL000098 | SCN5A |
| 437 | HuangQi | MOL000098 | F7 |
| 438 | HuangQi | MOL000098 | ADRB2 |
| 439 | HuangQi | MOL000098 | MMP3 |
| 440 | HuangQi | MOL000098 | RXRA |
| 441 | HuangQi | MOL000098 | ACHE |
| 442 | HuangQi | MOL000098 | GABRA1 |
| 443 | HuangQi | MOL000098 | MAOB |
| 444 | HuangQi | MOL000098 | RELA |
| 445 | HuangQi | MOL000098 | EGFR |
| 446 | HuangQi | MOL000098 | AKT1 |
| 447 | HuangQi | MOL000098 | VEGFA |
| 448 | HuangQi | MOL000098 | CCND1 |
| 449 | HuangQi | MOL000098 | BCL2 |
| 450 | HuangQi | MOL000098 | BCL2L1 |
| 451 | HuangQi | MOL000098 | FOS |
| 452 | HuangQi | MOL000098 | CDKN1A |
| 453 | HuangQi | MOL000098 | EIF6 |
| 454 | HuangQi | MOL000098 | BAX |
| 455 | HuangQi | MOL000098 | CASP9 |
| 456 | HuangQi | MOL000098 | PLAU |
| 457 | HuangQi | MOL000098 | MMP2 |
| 458 | HuangQi | MOL000098 | MMP9 |
| 459 | HuangQi | MOL000098 | MAPK1 |
| 460 | HuangQi | MOL000098 | IL10 |
| 461 | HuangQi | MOL000098 | EGF |
| 462 | HuangQi | MOL000098 | RB1 |
| 463 | HuangQi | MOL000098 | CD40LG |
| 464 | HuangQi | MOL000098 | JUN |
| 465 | HuangQi | MOL000098 | IL6 |
| 466 | HuangQi | MOL000098 | AHSA1 |
| 467 | HuangQi | MOL000098 | CASP3 |
| 468 | HuangQi | MOL000098 | TP53 |
| 469 | HuangQi | MOL000098 | ELK1 |
| 470 | HuangQi | MOL000098 | NFKBIA |
| 471 | HuangQi | MOL000098 | POR |
| 472 | HuangQi | MOL000098 | ODC1 |
| 473 | HuangQi | MOL000098 | XDH |
| 474 | HuangQi | MOL000098 | CASP8 |
| 475 | HuangQi | MOL000098 | TOP1 |
| 476 | HuangQi | MOL000098 | SOD1 |
| 477 | HuangQi | MOL000098 | PRKCA |
| 478 | HuangQi | MOL000098 | MMP1 |
| 479 | HuangQi | MOL000098 | HIF1A |
| 480 | HuangQi | MOL000098 | STAT1 |
| 481 | HuangQi | MOL000098 | RUNX1T1 |
| 482 | HuangQi | MOL000098 | CDK1 |
| 483 | HuangQi | MOL000098 | HSPA5 |
| 484 | HuangQi | MOL000098 | ERBB2 |
| 485 | HuangQi | MOL000098 | ACACA |
| 486 | HuangQi | MOL000098 | HMOX1 |
| 487 | HuangQi | MOL000098 | CYP3A4 |
| 488 | HuangQi | MOL000098 | CYP1A2 |
| 489 | HuangQi | MOL000098 | CAV1 |
| 490 | HuangQi | MOL000098 | MYC |
| 491 | HuangQi | MOL000098 | F3 |
| 492 | HuangQi | MOL000098 | GJA1 |
| 493 | HuangQi | MOL000098 | CYP1A1 |
| 494 | HuangQi | MOL000098 | ICAM1 |
| 495 | HuangQi | MOL000098 | IL1B |
| 496 | HuangQi | MOL000098 | CCL2 |
| 497 | HuangQi | MOL000098 | SELE |
| 498 | HuangQi | MOL000098 | VCAM1 |
| 499 | HuangQi | MOL000098 | PTGER3 |
| 500 | HuangQi | MOL000098 | CXCL8 |
| 501 | HuangQi | MOL000098 | PRKCB |
| 502 | HuangQi | MOL000098 | BIRC5 |
| 503 | HuangQi | MOL000098 | DUOX2 |
| 504 | HuangQi | MOL000098 | NOS3 |
| 505 | HuangQi | MOL000098 | HSPB1 |
| 506 | HuangQi | MOL000098 | TGFB1 |
| 507 | HuangQi | MOL000098 | SULT1E1 |
| 508 | HuangQi | MOL000098 | MGAM |
| 509 | HuangQi | MOL000098 | IL2 |
| 510 | HuangQi | MOL000098 | NR1I2 |
| 511 | HuangQi | MOL000098 | CYP1B1 |
| 512 | HuangQi | MOL000098 | CCNB1 |
| 513 | HuangQi | MOL000098 | PLAT |
| 514 | HuangQi | MOL000098 | THBD |
| 515 | HuangQi | MOL000098 | SERPINE1 |
| 516 | HuangQi | MOL000098 | COL1A1 |
| 517 | HuangQi | MOL000098 | IFNG |
| 518 | HuangQi | MOL000098 | ALOX5 |
| 519 | HuangQi | MOL000098 | IL1A |
| 520 | HuangQi | MOL000098 | MPO |
| 521 | HuangQi | MOL000098 | TOP2A |
| 522 | HuangQi | MOL000098 | NCF1 |
| 523 | HuangQi | MOL000098 | ABCG2 |
| 524 | HuangQi | MOL000098 | HAS2 |
| 525 | HuangQi | MOL000098 | GSTP1 |
| 526 | HuangQi | MOL000098 | NFE2L2 |
| 527 | HuangQi | MOL000098 | NQO1 |
| 528 | HuangQi | MOL000098 | PARP1 |
| 529 | HuangQi | MOL000098 | AHR |
| 530 | HuangQi | MOL000098 | PSMD3 |
| 531 | HuangQi | MOL000098 | SLC2A4 |
| 532 | HuangQi | MOL000098 | COL3A1 |
| 533 | HuangQi | MOL000098 | CXCL11 |
| 534 | HuangQi | MOL000098 | CXCL2 |
| 535 | HuangQi | MOL000098 | DCAF5 |
| 536 | HuangQi | MOL000098 | NR1I3 |
| 537 | HuangQi | MOL000098 | CHEK2 |
| 538 | HuangQi | MOL000098 | INSR |
| 539 | HuangQi | MOL000098 | CLDN4 |
| 540 | HuangQi | MOL000098 | PPARA |
| 541 | HuangQi | MOL000098 | PPARD |
| 542 | HuangQi | MOL000098 | HSF1 |
| 543 | HuangQi | MOL000098 | CRP |
| 544 | HuangQi | MOL000098 | CXCL10 |
| 545 | HuangQi | MOL000098 | CHUK |
| 546 | HuangQi | MOL000098 | SPP1 |
| 547 | HuangQi | MOL000098 | RUNX2 |
| 548 | HuangQi | MOL000098 | RASSF1 |
| 549 | HuangQi | MOL000098 | E2F1 |
| 550 | HuangQi | MOL000098 | E2F2 |
| 551 | HuangQi | MOL000098 | ACPP |
| 552 | HuangQi | MOL000098 | CTSD |
| 553 | HuangQi | MOL000098 | IGFBP3 |
| 554 | HuangQi | MOL000098 | IGF2 |
| 555 | HuangQi | MOL000098 | IRF1 |
| 556 | HuangQi | MOL000098 | ERBB3 |
| 557 | HuangQi | MOL000098 | PON1 |
| 558 | HuangQi | MOL000098 | DIO1 |
| 559 | HuangQi | MOL000098 | PCOLCE |
| 560 | HuangQi | MOL000098 | NPEPPS |
| 561 | HuangQi | MOL000098 | HK2 |
| 562 | HuangQi | MOL000098 | NKX3-1 |
| 563 | HuangQi | MOL000098 | RASA1 |
| 564 | HuangQi | MOL000098 | GSTM1 |
| 565 | HuangQi | MOL000098 | GSTM2 |
| 566 | HuangQi | MOL000098 | HTR2A |
| 567 | HuangQi | MOL000098 | HTR1D |
| 568 | HuangQi | MOL000098 | CALY |
| 569 | HuangQi | MOL000098 | HTR2B |
| 570 | HuangQi | MOL000098 | DRD2 |
| 571 | HuangQi | MOL000098 | DRD3 |
| 572 | HuangQi | MOL000098 | ADRA2A |
| 573 | HuangQi | MOL000098 | DRD4 |
| 574 | HuangQi | MOL000098 | DRD5 |
| 575 | HuangQi | MOL000098 | HTR1B |
| 576 | HuangQi | MOL000098 | HTR1A |
| 577 | HuangQi | MOL000098 | DRD1 |
| 578 | HuangQi | MOL000098 | HTR2C |
| 579 | HuangQi | MOL000098 | ADRA2C |
| 580 | HuangQi | MOL000098 | ADRA2B |
| 581 | DaHuang | MOL002235 | NOS2 |
| 582 | DaHuang | MOL002235 | AR |
| 583 | DaHuang | MOL002235 | F7 |
| 584 | DaHuang | MOL002235 | PTGS2 |
| 585 | DaHuang | MOL002235 | TOP2B |
| 586 | DaHuang | MOL002235 | ESR2 |
| 587 | DaHuang | MOL002235 | DPP4 |
| 588 | DaHuang | MOL002235 | HSP90AA1 |
| 589 | DaHuang | MOL002235 | PRSS1 |
| 590 | DaHuang | MOL002235 | NCOA2 |
| 591 | DaHuang | MOL002235 | CALM2 |
| 592 | DaHuang | MOL002235 | SERPIND1 |
| 593 | DaHuang | MOL002235 | SCN5A |
| 594 | DaHuang | MOL002235 | KDR |
| 595 | DaHuang | MOL002235 | PPARD |
| 596 | DaHuang | MOL002259 | TOP2B |
| 597 | DaHuang | MOL002268 | PTGS1 |
| 598 | DaHuang | MOL002268 | PTGS2 |
| 599 | DaHuang | MOL002268 | HSP90AA1 |
| 600 | DaHuang | MOL002268 | NCOA2 |
| 601 | DaHuang | MOL002268 | AKR1B1 |
| 602 | DaHuang | MOL002268 | JUN |
| 603 | DaHuang | MOL002280 | TOP2B |
| 604 | DaHuang | MOL002281 | NOS2 |
| 605 | DaHuang | MOL002281 | PTGS1 |
| 606 | DaHuang | MOL002281 | ESR1 |
| 607 | DaHuang | MOL002281 | PTGS2 |
| 608 | DaHuang | MOL002281 | ESR2 |
| 609 | DaHuang | MOL002281 | HSP90AA1 |
| 610 | DaHuang | MOL002281 | CHEK1 |
| 611 | DaHuang | MOL002288 | TOP2B |
| 612 | DaHuang | MOL002297 | PGR |
| 613 | DaHuang | MOL002297 | NCOA2 |
| 614 | DaHuang | MOL000471 | PTGS1 |
| 615 | DaHuang | MOL000471 | PTGS2 |
| 616 | DaHuang | MOL000471 | HSP90AA1 |
| 617 | DaHuang | MOL000471 | NCOA2 |
| 618 | DaHuang | MOL000471 | PKIA |
| 619 | DaHuang | MOL000471 | AKR1B1 |
| 620 | DaHuang | MOL000471 | CDKN1A |
| 621 | DaHuang | MOL000471 | EIF6 |
| 622 | DaHuang | MOL000471 | BAX |
| 623 | DaHuang | MOL000471 | CD40LG |
| 624 | DaHuang | MOL000471 | CASP3 |
| 625 | DaHuang | MOL000471 | TP53 |
| 626 | DaHuang | MOL000471 | FASN |
| 627 | DaHuang | MOL000471 | PRKCA |
| 628 | DaHuang | MOL000471 | PRKCE |
| 629 | DaHuang | MOL000471 | CDK1 |
| 630 | DaHuang | MOL000471 | PCNA |
| 631 | DaHuang | MOL000471 | MYC |
| 632 | DaHuang | MOL000471 | IL1B |
| 633 | DaHuang | MOL000471 | PRKCD |
| 634 | DaHuang | MOL000471 | CCNB1 |
| 635 | DaHuang | MOL000096 | PTGS1 |
| 636 | DaHuang | MOL000096 | ESR1 |
| 637 | DaHuang | MOL000096 | PTGS2 |
| 638 | DaHuang | MOL000096 | HSP90AA1 |
| 639 | DaHuang | MOL000096 | LACTBL1 |
| 640 | DaHuang | MOL000096 | NCOA2 |
| 641 | DaHuang | MOL000096 | CALM2 |
| 642 | DaHuang | MOL000096 | FASN |
| 643 | DaHuang | MOL000096 | PPARG |
| 644 | DaHuang | MOL000096 | KLF7 |
| 645 | DaHuang | MOL000358 | PGR |
| 646 | DaHuang | MOL000358 | NCOA2 |
| 647 | DaHuang | MOL000358 | PTGS1 |
| 648 | DaHuang | MOL000358 | PTGS2 |
| 649 | DaHuang | MOL000358 | HSP90AA1 |
| 650 | DaHuang | MOL000358 | KCNH2 |
| 651 | DaHuang | MOL000358 | DRD1 |
| 652 | DaHuang | MOL000358 | CHRM3 |
| 653 | DaHuang | MOL000358 | CHRM1 |
| 654 | DaHuang | MOL000358 | SCN5A |
| 655 | DaHuang | MOL000358 | CHRM4 |
| 656 | DaHuang | MOL000358 | PDE3A |
| 657 | DaHuang | MOL000358 | HTR2A |
| 658 | DaHuang | MOL000358 | ADRA1D |
| 659 | DaHuang | MOL000358 | CHRM2 |
| 660 | DaHuang | MOL000358 | ADRA1B |
| 661 | DaHuang | MOL000358 | ADRB2 |
| 662 | DaHuang | MOL000358 | CHRNA2 |
| 663 | DaHuang | MOL000358 | SLC6A4 |
| 664 | DaHuang | MOL000358 | OPRM1 |
| 665 | DaHuang | MOL000358 | GABRA1 |
| 666 | DaHuang | MOL000358 | BCL2 |
| 667 | DaHuang | MOL000358 | BAX |
| 668 | DaHuang | MOL000358 | CASP9 |
| 669 | DaHuang | MOL000358 | JUN |
| 670 | DaHuang | MOL000358 | CASP3 |
| 671 | DaHuang | MOL000358 | CASP8 |
| 672 | DaHuang | MOL000358 | PRKCA |
| 673 | DaHuang | MOL000358 | TGFB1 |
| 674 | DaHuang | MOL000358 | PON1 |
| 675 | DaHuang | MOL000358 | MAP2 |
| 676 | TaoRen | MOL001323 | PGR |
| 677 | TaoRen | MOL001323 | PTGS2 |
| 678 | TaoRen | MOL001323 | GABRA1 |
| 679 | TaoRen | MOL001323 | ADH1C |
| 680 | TaoRen | MOL001323 | NR3C2 |
| 681 | TaoRen | MOL001328 | PTGS1 |
| 682 | TaoRen | MOL001328 | CHRM1 |
| 683 | TaoRen | MOL001328 | PTGS2 |
| 684 | TaoRen | MOL001328 | SLC6A2 |
| 685 | TaoRen | MOL001328 | GABRA1 |
| 686 | TaoRen | MOL001328 | PRSS1 |
| 687 | TaoRen | MOL001328 | GRIA2 |
| 688 | TaoRen | MOL001329 | PTGS2 |
| 689 | TaoRen | MOL001329 | CA2 |
| 690 | TaoRen | MOL001329 | GABRA1 |
| 691 | TaoRen | MOL001329 | NCOA2 |
| 692 | TaoRen | MOL001340 | CHRM3 |
| 693 | TaoRen | MOL001340 | CHRM1 |
| 694 | TaoRen | MOL001340 | PTGS2 |
| 695 | TaoRen | MOL001340 | CHRM2 |
| 696 | TaoRen | MOL001340 | GABRA1 |
| 697 | TaoRen | MOL001342 | PGR |
| 698 | TaoRen | MOL001344 | PGR |
| 699 | TaoRen | MOL001349 | NR3C2 |
| 700 | TaoRen | MOL001349 | PGR |
| 701 | TaoRen | MOL001351 | NR3C2 |
| 702 | TaoRen | MOL001351 | GABRA1 |
| 703 | TaoRen | MOL001352 | F7 |
| 704 | TaoRen | MOL001352 | PTGS2 |
| 705 | TaoRen | MOL001352 | HSP90AA1 |
| 706 | TaoRen | MOL001352 | NCOA2 |
| 707 | TaoRen | MOL001352 | CALM2 |
| 708 | TaoRen | MOL001353 | CHRM2 |
| 709 | TaoRen | MOL001353 | GABRA1 |
| 710 | TaoRen | MOL001353 | GRIA2 |
| 711 | TaoRen | MOL001355 | PTGS2 |
| 712 | TaoRen | MOL001355 | GABRA1 |
| 713 | TaoRen | MOL001355 | GRIA2 |
| 714 | TaoRen | MOL001358 | CHRM3 |
| 715 | TaoRen | MOL001358 | CHRM1 |
| 716 | TaoRen | MOL001358 | PTGS2 |
| 717 | TaoRen | MOL001358 | PDE3A |
| 718 | TaoRen | MOL001358 | SLC6A3 |
| 719 | TaoRen | MOL001358 | ADRB2 |
| 720 | TaoRen | MOL001358 | SLC6A4 |
| 721 | TaoRen | MOL001360 | GABRA1 |
| 722 | TaoRen | MOL001360 | GRIA2 |
| 723 | TaoRen | MOL001361 | PTGS2 |
| 724 | TaoRen | MOL001361 | CA2 |
| 725 | TaoRen | MOL001368 | PTGS1 |
| 726 | TaoRen | MOL001368 | PTGS2 |
| 727 | TaoRen | MOL001368 | HSP90AA1 |
| 728 | TaoRen | MOL001368 | NCOA2 |
| 729 | TaoRen | MOL001368 | CALM2 |
| 730 | TaoRen | MOL000493 | PGR |
| 731 | TaoRen | MOL000493 | PTGS1 |
| 732 | TaoRen | MOL000493 | PTGS2 |
| 733 | TaoRen | MOL000493 | HSP90AA1 |
| 734 | TaoRen | MOL000493 | NCOA2 |
| 735 | TaoRen | MOL000296 | PGR |
| 736 | TaoRen | MOL000296 | NCOA2 |
| 737 | TaoRen | MOL000296 | CHRM3 |
| 738 | TaoRen | MOL000296 | CHRM1 |
| 739 | TaoRen | MOL000296 | CHRM2 |
| 740 | TaoRen | MOL000296 | ADRA1B |
| 741 | TaoRen | MOL000296 | GABRA1 |
| 742 | TaoRen | MOL000296 | GRIA2 |
| 743 | TaoRen | MOL000296 | ADH1B |
| 744 | TaoRen | MOL000296 | ADH1C |
| 745 | TaoRen | MOL000296 | LYZ |
| 746 | TaoRen | MOL000296 | PTGS1 |
| 747 | TaoRen | MOL000296 | SCN5A |
| 748 | TaoRen | MOL000296 | PTGS2 |
| 749 | TaoRen | MOL000296 | RXRA |
| 750 | TaoRen | MOL000296 | PDE3A |
| 751 | TaoRen | MOL000296 | SLC6A2 |
| 752 | TaoRen | MOL000358 | PGR |
| 753 | TaoRen | MOL000358 | NCOA2 |
| 754 | TaoRen | MOL000358 | PTGS1 |
| 755 | TaoRen | MOL000358 | PTGS2 |
| 756 | TaoRen | MOL000358 | HSP90AA1 |
| 757 | TaoRen | MOL000358 | KCNH2 |
| 758 | TaoRen | MOL000358 | DRD1 |
| 759 | TaoRen | MOL000358 | CHRM3 |
| 760 | TaoRen | MOL000358 | CHRM1 |
| 761 | TaoRen | MOL000358 | SCN5A |
| 762 | TaoRen | MOL000358 | CHRM4 |
| 763 | TaoRen | MOL000358 | PDE3A |
| 764 | TaoRen | MOL000358 | HTR2A |
| 765 | TaoRen | MOL000358 | ADRA1D |
| 766 | TaoRen | MOL000358 | CHRM2 |
| 767 | TaoRen | MOL000358 | ADRA1B |
| 768 | TaoRen | MOL000358 | ADRB2 |
| 769 | TaoRen | MOL000358 | CHRNA2 |
| 770 | TaoRen | MOL000358 | SLC6A4 |
| 771 | TaoRen | MOL000358 | OPRM1 |
| 772 | TaoRen | MOL000358 | GABRA1 |
| 773 | TaoRen | MOL000358 | BCL2 |
| 774 | TaoRen | MOL000358 | BAX |
| 775 | TaoRen | MOL000358 | CASP9 |
| 776 | TaoRen | MOL000358 | JUN |
| 777 | TaoRen | MOL000358 | CASP3 |
| 778 | TaoRen | MOL000358 | CASP8 |
| 779 | TaoRen | MOL000358 | PRKCA |
| 780 | TaoRen | MOL000358 | TGFB1 |
| 781 | TaoRen | MOL000358 | PON1 |
| 782 | TaoRen | MOL000358 | MAP2 |
| 783 | DangGui | MOL000358 | PGR |
| 784 | DangGui | MOL000358 | NCOA2 |
| 785 | DangGui | MOL000358 | PTGS1 |
| 786 | DangGui | MOL000358 | PTGS2 |
| 787 | DangGui | MOL000358 | HSP90AA1 |
| 788 | DangGui | MOL000358 | KCNH2 |
| 789 | DangGui | MOL000358 | DRD1 |
| 790 | DangGui | MOL000358 | CHRM3 |
| 791 | DangGui | MOL000358 | CHRM1 |
| 792 | DangGui | MOL000358 | SCN5A |
| 793 | DangGui | MOL000358 | CHRM4 |
| 794 | DangGui | MOL000358 | PDE3A |
| 795 | DangGui | MOL000358 | HTR2A |
| 796 | DangGui | MOL000358 | ADRA1D |
| 797 | DangGui | MOL000358 | CHRM2 |
| 798 | DangGui | MOL000358 | ADRA1B |
| 799 | DangGui | MOL000358 | ADRB2 |
| 800 | DangGui | MOL000358 | CHRNA2 |
| 801 | DangGui | MOL000358 | SLC6A4 |
| 802 | DangGui | MOL000358 | OPRM1 |
| 803 | DangGui | MOL000358 | GABRA1 |
| 804 | DangGui | MOL000358 | BCL2 |
| 805 | DangGui | MOL000358 | BAX |
| 806 | DangGui | MOL000358 | CASP9 |
| 807 | DangGui | MOL000358 | JUN |
| 808 | DangGui | MOL000358 | CASP3 |
| 809 | DangGui | MOL000358 | CASP8 |
| 810 | DangGui | MOL000358 | PRKCA |
| 811 | DangGui | MOL000358 | TGFB1 |
| 812 | DangGui | MOL000358 | PON1 |
| 813 | DangGui | MOL000358 | MAP2 |
| 814 | DangGui | MOL000449 | PGR |
| 815 | DangGui | MOL000449 | NR3C2 |
| 816 | DangGui | MOL000449 | NCOA2 |
| 817 | DangGui | MOL000449 | ADH1C |
| 818 | DangGui | MOL000449 | RXRA |
| 819 | DangGui | MOL000449 | NCOA1 |
| 820 | DangGui | MOL000449 | PTGS1 |
| 821 | DangGui | MOL000449 | PTGS2 |
| 822 | DangGui | MOL000449 | ADRA2A |
| 823 | DangGui | MOL000449 | SLC6A2 |
| 824 | DangGui | MOL000449 | SLC6A3 |
| 825 | DangGui | MOL000449 | ADRB2 |
| 826 | DangGui | MOL000449 | AKR1B1 |
| 827 | DangGui | MOL000449 | PLAU |
| 828 | DangGui | MOL000449 | LTA4H |
| 829 | DangGui | MOL000449 | MAOB |
| 830 | DangGui | MOL000449 | MAOA |
| 831 | DangGui | MOL000449 | CTRB1 |
| 832 | DangGui | MOL000449 | CHRM3 |
| 833 | DangGui | MOL000449 | CHRM1 |
| 834 | DangGui | MOL000449 | ADRB1 |
| 835 | DangGui | MOL000449 | SCN5A |
| 836 | DangGui | MOL000449 | HTR2A |
| 837 | DangGui | MOL000449 | ADRA1D |
| 838 | DangGui | MOL000449 | CHRM2 |
| 839 | DangGui | MOL000449 | ADRA1B |
| 840 | DangGui | MOL000449 | GABRA1 |

| **Table S4.** The targets of IgAN | | | | | | | | | | | | |
| --- | --- | --- | --- | --- | --- | --- | --- | --- | --- | --- | --- | --- |
| **Target names** | | | | | | | | | | | | |
| COL4A3 | UMOD | CD79A | COL4A4 | IGAN1 | ACE | AGT | MFF-DT | PIGR | COL4A1 | NLRP3 | IGAN2 | CD40LG |
| FCAR | SPRY2 | REN | ALB | TGFB1 | TNF | NPHS1 | IL6 | HNF1B | TNFRSF13B | NPHS2 | GLA | JCHAIN |
| B2M | CFH | C3 | CCL2 | AGTR1 | MAFB | WT1 | COL4A5 | APOL1 | IL10 | SERPINB7 | CTLA4 | MEFV |
| HNFJ3 | SEC61A1 | COL4A2 | MME | TTR | CD2AP | IL1RN | COL17A1 | CD151 | CFHR5 | IL1B | HNP1 | AICDA |
| HLA-DQA1 | TGFBR2 | MBL2 | MYH9 | HLA-DQB1 | SELE | AMBP | CD40 | VEGFA | C1GALT1 | TREX1 | SCGB1A1 | ICAM1 |
| PVT1 | TGFB2 | HAVCR1 | IGHA1 | PLA2R1 | IL4 | TFRC | FN1 | FCAMR | NAGLU | MIR21 | TGFBR1 | CFB |
| FBN1 | NOS3 | IL2RA | TNFSF13B | IFNG | INS | CBS | SYNPO | APOA1 | SOD2 | HLA-DRB1 | LMX1B | NOTCH3 |
| UNG | LRP2 | HP | IL18 | APOE | MIR192 | AQP2 | SERPINE1 | MVK | CRP | ACTN4 | SMARCAL1 | SELL |
| CCN2 | LOC129935730 | ADA2 | PON1 | CR2 | ADIPOQ | MMP9 | C4A | IL2 | AKR1B1 | KAT6B | ADD1 | SLC12A3 |
| ITGAM | LCN2 | BTK | MTHFR | CXCL8 | IL1R1 | SPP1 | CCR5 | NPHP1 | COL3A1 | MIR216A | C1GALT1C1 | PPARG |
| HFE | INF2 | RAG1 | CST3 | ICOS | NPHP4 | CFHR1 | HGF | MALAT1 | MIF | TP53 | ITGB1 | CFP |
| COQ2 | GAPDH | TNFRSF1A | CD4 | MUC1 | CD19 | IGHE | PAX2 | VTN | SLC41A1 | FAS | THSD7A | TRPC6 |
| ADM | ATM | CFHR3 | IL15 | OTC | EPO | PDGFB | CCL5 | NPPA | POLG | NUP107 | STAT3 | MTOR |
| DNMT1 | SMAD2 | CHD7 | NAGA | EDN1 | HNF1A | FOXP3 | SERPINA1 | IL2RG | ADA | IL7R | MASP1 | TLR4 |
| SYK | MPO | PGM3 | CACNA1C | AGER | HPRT1 | FGA | EYA1 | KCNQ1 | HLA-B | IGKC | SLC2A1 | CYBA |
| ENPP1 | MET | BSND | TNFRSF13C | MEG8 | WFS1 | SCARB2 | HLA-A | NOD2 | PF4 | CD55 | NFE2L2 | HMOX1 |
| SGK1 | LAMB2 | APOA2 | JAK3 | STAT1 | SELP | DSG1 | TGM2 | SMAD4 | GATA3 | LOC102723407 | DCN | LTA |
| MGP | MIR377 | PDSS2 | PIK3CD | CD8A | PSMB8 | VCAM1 | PIK3R1 | MIR148B | TNFSF13 | MIR199A1 | PRTN3 | BLK |
| SLC2A2 | DGKE | AVP | COL4A6 | MIR217 | ITGB2 | MIR152 | CFI | PLCE1 | ACE2 | GCK | CRB2 | IL1A |
| PGR-AS1 | SOD1 | KCNJ10 | WAS | IGHA2 | CEP290 | FAN1 | MASP2 | FASLG | ATP6V1B1 | PKD1 | LINC01672 | MIR29C |
| ZFYVE9 | F2 | SLC12A1 | ESR1 | DNASE1L3 | MIR30A | NPHP3 | MT-TF | IGF1 | MYH14 | PTPRC | TNFRSF11B | PIK3CG |
| SIX1 | EDNRB | LRBA | GJA1 | MIR146A | SMAD3 | DNMT3B | SLC19A2 | VWF | FABP1 | KL | SALL1 | MANBA |
| SEMA3E | SIRT1 | MIR423 | KANK2 | CASP8 | MYO1E | RHOA | MIR214 | EGF | CLCNKB | AGTR2 | APRT | IL13 |
| C1QA | POLR1C | LYZ | NSD2 | TRIM8 | ALMS1 | CCND1 | ANLN | THBD | TNC | CD27 | EGFR | SIX5 |
| LIPC | KANK4 | BMP6 | LIG4 | SNHG6 | IL5 | BMP7 | PODXL | CD247 | PDGFD | NEAT1 | PRPS1 | MYD88 |
| AKT1 | PARK7 | MAN2B1 | SNAI2 | AFG2A | HNF4A | FGFR3 | UBD | CDH1 | CYP11B2 | MEG3 | HSPG2 | ITGA2 |
| CARD11 | IRS1 | IL21 | NEU1 | MIR155 | CTNS | MIR150 | LPL | IL17A | SMAD7 | SCNN1G | CDKN1C | SCNN1B |
| FCGR3A | PTEN | DIABLO | SLC26A4 | MSRB3 | ATRIP | TF | NFKBIA | TIMP1 | MMP7 | LCK | CLU | RASGRP1 |
| TLR2 | HIF1A | EDN3 | BCS1L | DIAPH1 | SLC3A1 | MYO15A | MIAT | MIR200A | C5 | AGXT | KANK1 | SLC17A5 |
| STIM1 | ST6GALNAC2 | LYN | MITF | RANGAP1 | FGF3 | TWNK | CDH23 | TIMM8A | GJB2 | DSP | NPPB | MMP2 |
| SLC29A3 | PPARA | SOD2-OT1 | CCR1 | CCR2 | KMT2D | GSTM1 | IL6R | FOXI1 | WHRN | CCL3 | CXCR4 | ABCA1 |
| NFKB1 | MIR133B | KCNJ11 | DCDC2 | TCF7L2 | CD86 | COL11A2 | DSC3 | MIR96 | KRAS | CCR6 | TTC7A | TLR9 |
| CLDN14 | CETP | MIR590 | STING1 | LTF | TNFRSF1B | NOS2 | KCNJ1 | PRKCB | PPARGC1A | FGF2 | CD3D | CD36 |
| H19 | MIR34A | APOB | MYO7A | APOH | IFIH1 | STAT4 | MIR193A | COL9A3 | EYA4 | MEST | RPL36A-HNRNPH2 | IRF5 |
| DIAPH3 | PAX3 | USH1C | OTOF | IGF1R | CAT | IRAK4 | SH2D1A | LINC02605 | TCOF1 | LMNA | NFKB2 | ILDR1 |
| CXCL10 | TAP2 | IGKV3-20 | IFNA1 | TUG1 | TJP2 | CD46 | MAPK1 | MIR1915 | RUVBL1 | DOCK8 | RDX | TFAP2A |
| KARS1 | MIR130A | ESRRB | ATP6V1B2 | LARS2 | GJB3 | NARS2 | GJB6 | PCDH15 | SLC26A5 | ADGRV1 | TMPRSS3 | TMC1 |
| TRMU | ESPN | POU3F4 | STRC | PTPN22 | FCGR2A | PLAT | SALL4 | TTC21B | NQO1 | BTD | MTR | MMP12 |
| LEP | CRYM | IGHM | LOC126862264 | MIR223 | LRTOMT | MIR27A | CYP3A4 | JUN | COL2A1 | TYR | S1PR2 | SOX10 |
| HARS1 | HARS2 | ROBO2 | UCP2 | RBP4 | USH2A | MIR141 | CERNA3 | CD79B | SAA1 | NLRC4 | C11orf65 | FAT1 |
| SLC5A2 | PKHD1 | GREM1 | CYLD | INSR | PARP1 | KDM6A | CARD9 | KCNE1 | RMND1 | XIST | MBP | TSC1 |
| ORAI1 | CD14 | APOC3 | ACTG1 | CP | GSDME | FLT1 | PLG | PNP | WDR19 | CD44 | GGT1 | ACYP2 |
| CASP10 | GAS6 | PIK3CA | HRAS | PRKCD | NRAS | RAF1 | RPS6KA3 | AIFM1 | ADCY1 | CACNA1D | HSD17B4 | CLPP |
| FDXR | SUCLA2 | DLX5 | PEX1 | SUCLG1 | EPS8 | P2RX2 | PNPT1 | COL11A1 | COL9A1 | MYO6 | SERPINB6 | SLC33A1 |
| SLC52A3 | CHSY1 | COCH | COL9A2 | HOMER2 | HOXB1 | KCNQ4 | NDP | POLR1D | ABHD12 | CD164 | GPSM2 | PEX6 |
| CDC14A | CLIC5 | GRHL2 | MYO3A | PEX26 | TRIOBP | ANKH | CIB2 | DCAF17 | SLC17A8 | SLC52A2 | SLITRK6 | TBC1D24 |
| CCDC50 | DSPP | EPS8L2 | MARVELD2 | OSBPL2 | RIPOR2 | TECTA | USH1G | WBP2 | POU4F3 | OTOA | BDP1 | CEP78 |
| GIPC3 | PDZD7 | TMEM132E | ELMOD3 | PJVK | CEACAM16 | CLRN1 | GRXCR1 | LOXHD1 | SMPX | TSPEAR | TMIE | TPRN |
| CABP2 | OTOG | LHFPL5 | OTOGL | SYNE4 | GRXCR2 | PLAU | VDR | SAMHD1 | MIR9-1 | ABCC8 | MYC | TIMP3 |
| TRAC | GSN | MTMR3 | BCL2 | RETN | PAX5 | MIRLET7B | PSTPIP1 | CTNNB1 | PDCD1 | CSF1 | TAP1 | PCNA |
| CDKN2A | TCF3 | MAF | IL6ST | ZAP70 | MRE11 | FGB | IGHMBP2 | CD28 | HMGCR | CD80 | MIR140 | EDNRA |
| STAT5B | CFTR | NOTCH1 | RTEL1 | NLRP1 | BLNK | IGLL1 | JAK1 | SOCS1 | FABP2 | KNG1 | IKZF1 | CD59 |
| MIR146B | CEL | CLEC16A | AIRE | ARPC5 | ITCH | RNASE3 | IGFBP1 | THBS1 | DPP4 | TNFRSF25 | F3 | PRKDC |
| GSTT1 | XDH | PTPRO | FCGR3B | CXCL9 | IL12A | MIR204 | PTPN11 | CXCR3 | TLR3 | MIR17 | WRN | CASP1 |
| ILK | MT-RNR1 | SOX2 | MIR29A | TPO | BDKRB2 | IL10RA | IL1RAPL2 | CTBP1 | CASP3 | ATP6V0A4 | CX3CR1 | NALT1 |
| MIR135A1 | IAPP | ITGAL | IL2RB | ITGA4 | PCSK1 | GTF2H5 | IL4R | PDGFA | F12 | C5AR1 | TNFRSF11A | RNU4ATAC |
| IL7 | NOX4 | PRF1 | MOK | MIR144 | SSBP1 | KIRREL1 | PTGS2 | RELA | RAC1 | IL12B | APEX1 | FGF23 |
| ADD2 | XBP1 | PRKCA | CYP24A1 | LAMA1 | SDCCAG8 | CUBN | IGF2 | STAT2 | NLRP12 | RMRP | KITLG | MIR126 |
| MIR34C | CSF2 | MMP3 | DDR1 | PRSS1 | EIF2AK3 | CXCL12 | TBXAS1 | MIR125A | MIR18A | GP1BA | ANGPT2 | MIR486-1 |
| DRD2 | SMAD5-AS1 | MMACHC | WIPF1 | COL18A1 | MIR532 | EXT1 | S100A8 | MIR25 | ADCY10 | MIRLET7C | EPHX2 | COL7A1 |
| UNC13D | CD38 | MIR142 | GATA2 | C1QB | JAG1 | CMA1 | COL8A2 | GHRL | MIR221 | UCP1 | GPX3 | COQ8B |
| SPI1 | CLCN5 | NR3C2 | IQCB1 | BGLAP | MIR145 | XPO5 | TRA | CD69 | REL | GCG | PECAM1 | BTNL2 |
| ADRB2 | MIR215 | ITGAX | MIR205 | TMX2-CTNND1 | GAS5 | ACP5 | FCER2 | HPSE | FOXO1 | PTX3 | LIF | AXL |
| IL33 | FCN3 | IFNGR1 | DHFR | CDC42 | HLA-DPB1 | S100A4 | RFX6 | TET2 | ITGB4 | TNFSF11 | PSMB9 | SAA4 |
| MIR122 | CBL | FCRL3 | MIR185 | ITGA1 | MT-ATP6 | CR1 | TGIF1 | PLAUR | TJP1 | BRCA1 | ENG | IRF1 |
| GNB3 | C4B | MPDU1 | CX3CL1 | MIR183 | IKBKB | TRNT1 | BMP4 | S100A9 | COL5A1 | KDR | PIK3CB | TNFSF10 |
| F10 | NAMPT | WNT4 | MIR181A1 | TGFB3 | NID1 | MCAM | XIAP | TNFSF12-TNFSF13 | IGHD | MIR98 | PTH | INVS |
| MIR16-1 | RAD51 | MAP2K1 | MIR30B | ZEB1 | TNXB | MMP1 | CYP2C9 | HAVCR2 | DNAH8 | EMSLR | LBR | HORMAD2 |
| ELN | CXCL1 | CDK2 | HSPD1 | MAPK8 | JAK2 | ADAM17 | GHR | TBX1 | CCL25 | MYOM2 | MAPK14 | MDK |
| ACKR2 | PAX6 | TERT | PAFAH1B1 | ISG15 | MIR424 | MIR29B1 | MIR23B | GDF15 | GP6 | UMPS | MIR200C | SRC |
| AHI1 | POU2AF1 | POU5F1 | SMAD1 | LPA | AHSG | TFR2 | PLA2G7 | HMGB1 | FABP4 | ITGA5 | MYH7 | ADRB3 |
| MIR19A | TYMS | TLR1 | MIR212 | MIR328 | MIR483 | RAI1 | SST | THBS4 | IFNB1 | CYP27B1 | PKM | MUC20 |
| AGRN | ATF6 | SGPL1 | PRL | HTR2A | MIR23A | TRAF1 | SLC30A8 | HDAC6 | MT-TL1 | MIR335 | BRAF | CD81 |
| LRP1 | MIR93 | NOTCH2 | E2F1 | ITGA3 | MIRLET7D | SERPINC1 | STAT6 | MIR877 | MIR342 | GSTP1 | MIR485 | GYS1 |
| ST6GAL1 | CIITA | CDCA7 | ANPEP | LY75 | MIR106B | RB1 | SLC22A11 | KLF4 | ITK | SCN9A | IL5RA | BAX |
| GC | VCL | NR3C1 | MR1 | SNORD15A | MIR374A | TSC2 | LEPQTL1 | MIR320A | GPANK1 | FTO | TLX1NB | CD226 |
| ADAMTS13 | CCL28 | MIR497 | CASR | OSM | TNFSF12 | HSPA1A | MAPK3 | MIR106A | ADNP | MT-CO1 | SCARB1 | CREBBP |
| FANCM | HSPA4 | ITPR1 | MIR324 | ELANE | APCS | HLA-DPA1 | SUV39H1 | MAP2K2 | GPT | STX11 | RPL26 | IL11 |
| SIRPA | MAP3K14 | MAD2L2 | BDKRB1 | DDIT3 | ACTB | SIX2 | HDAC4 | MIR30E | SOX15 | ACOXL | HCG9 | NF1 |
| EPCAM | FANCB | CALR | HMCN1 | DNAJB11 | MIR100 | NUP160 | POSTN | NRP1 | DICER1 | GZMB | GLUD1 | MIR20A |
| STUB1 | HLA-DPB2 | LYST | F2RL1 | MIR92A1 | LAMA3 | TAFAZZIN | CFHR4 | DNMT3A | FDX1 | SDC1 | FCGR2B | GALNT2 |
| IPO8 | BMP2 | MIR675 | STXBP2 | FOS | MT-ND4 | MB | FCER1A | ADH1B | LINC01194 | NPY | IL9 | MIR149 |
| LAMB1 | GSK3B | MT-ND2 | CDKN1B | IRF3 | ALK | HAX1 | C1QC | IFT140 | CASP9 | MMEL1 | SNAI1 | CYP3A5 |
| VIM | TNNI3 | TRAF6 | LAMP2 | MYH6 | SLC22A6 | CDKN1A | IGFBP3 | MSN | DNAAF1 | BDNF-AS | RNASEH2C | MIR451A |
| CAMP | DOLK | CHEK1 | GALNS | CYBB | NOS1 | MIR200B | IL23R | MTTP | CYP2J2 | GCLM | GJA4 | CARD14 |
| TRA-TGC7-1 | COL1A2 | XRCC2 | RNASEH2A | TXN | MS4A1 | MIRLET7A1 | SLC2A9 | MLKL | COQ6 | CD22 | CYP2D6 | KMT2C |
| CCL20 | RIGI | GAD2 | CHGA | KEAP1 | CBLB | PTK2 | MIR133A1 | MIR196A1 | MIR330 | MIR455 | MIR224 | MIRLET7G |
| ERBB2 | MIR615 | F5 | ADAM10 | G6PC3 | PDGFRB | MMP10 | FGF21 | MIR9-3 | SLC26A3 | NPPC | TYK2 | VDAC1 |
| G6PD | MIR27B | ITIH4 | NPNT | DEFA5 | EP300 | CLEC12A | SLC22A2 | SLC37A4 | TRPC1 | FUT4 | KIRREL2 | ACSM3 |
| PXDN | PXDNL | APOA4 | MICA | XCL1 | AKT2 | FGFR1 | DES | CCR3 | LAMA5 | HSPB1 | MIR197 | MIR30C1 |
| APOM | TIMP2 | PRDM1 | SNORD44 | LTBR | GCKR | HDAC9 | EXO1 | MIR210 | DEFA3 | MIR26B | GANAB | VIPAS39 |
| LAMC1 | VAV3 | EZH2 | PEPD | MIR186 | CXCR2 | PRKN | NOX1 | ITGB3 | EEF1A1 | LRRC8A | PTHLH | C3AR1 |
| SNCA | LTBP1 | ANG | TNR | TRDN | GCM1 | MIR503 | SOSTDC1 | MIR130B | PI4KA | LGALS3 | MMP8 | ARHGAP24 |
| MIR373 | LAP3 | FXYD2 | CARD8 | IBSP | CD274 | WDR73 | APP | SLC22A12 | SLC17A1 | GPX1 | NOTCH4 | TLR7 |
| ITPR3 | RUNX1 | DDN | FCGR1A | PLA2G2A | COQ8A | CGAS | SPTAN1 | MX1 | CEACAM1 | CREB1 | MIR15A | H3C14 |
| SAA2 | MIR542 | OAS1 | MIR196B | TNFRSF6B | MIR9-2 | CD163 | SFTA3 | RET | MIR296 | UTS2 | NES | SLC9A3 |
| LRG1 | LALBA | OXA1L | RELB | IL18BP | MDM2 | MIR208A | NPY1R | PRKCSH | HBEGF | SIRT6 | MIR361 | ATL1 |
| COL8A1 | BCL6 | RARA | AR | MIRLET7I | PCSK9 | CAV1 | VPS33B | MMAB | TTN | MIR26A1 | APLN | SMAD5 |
| PROM1 | SETD2 | H3-3B | SOCS3 | FCRL5 | TAB2 | ETS1 | MMAA | ZNF407 | NFAT5 | HLA-E | IL3 | APOC2 |
| GSDMD | RIPK1 | APAF1 | CEBPA | IL1RL1 | RGS1 | CD70 | SMPDL3B | IRF8 | FYN | SHC1 | GSTA1 | EXT2 |
| CCNB1 | PWAR1 | LDHA | MIR494 | AOC3 | RPL18 | SLC9A1 | DEFA1 | SAA2-SAA4 | ASGR2 | NCALD | RNASEH2B | MMUT |
| ATR | LDLR | SHROOM3 | ITGB7 | DEFA1A3 | CDH2 | HORMAD2-AS1 | DEFA9P | MT-CYB | TMPO | FOXO3 | SPINK1 | MIR33A |
| CDK5 | PDPN | PLCG1 | MIR1260A | FAT4 | LCP2 | SLC46A1 | TNFRSF10A | ATP6AP2 | OCRL | UBR3 | SDCBP | ITGA6 |
| SMARCA4 | NEUROG3 | MIR137 | FGF1 | AREG | CYCS | FGF9 | TXNIP | SH2B3 | COLEC11 | MIR151A | SLC7A9 | CYP19A1 |
| ZNF236 | DNM3 | MAGI2 | TNS2 | MIR24-1 | MIR638 | ENAH | NUP205 | NUP93 | RBPJ | GATA4 | HIPK2 | RNU6-1 |
| SREBF1 | MPL | XRCC1 | IFI27 | APOBEC1 | SDHB | ABCB1 | YAP1 | F9 | ALPI | SCIN | FCN2 | RAB27A |
| UNC119 | GSS | NXF5 | PDE5A | HMGB2 | TNFAIP1 | LGALS1 | MIR19B1 | XRCC3 | AGO2 | TNFRSF8 | TG | STAT5A |
| SERPINH1 | NGF | SNORD118 | ACKR1 | SDC2 | PTPN3 | COL1A1 | SLPI | TNFSF14 | DLEU2 | SOS1 | REG1A | CABIN1 |
| HLA-G | MIR488 | MLH1 | HLA-DMA | IGLL5 | NCAM1 | MIR28 | MIR20B | MIRLET7F1 | NCF2 | TNFRSF12A | CYP21A2 | MIR30D |
| PRPS1L1 | MIRLET7A3 | MIRLET7A2 | DSC2 | MIR505 | EMP2 | ANGPT1 | PXN | H1-5 | NLRC5 | PTPRN | PIK3C3 | ACTN1 |
| KLRK1 | TGM1 | CDK1 | BATF | TLR10 | THPO | AQP5 | LOC129932089 | C1QTNF3 | PRKD1 | USP18 | CRIPT | PDGFC |
| BDNF | TSBP1 | CALCA | MIR15B | IFNAR1 | MIR99B | INPP5D | CISH | MIR490 | KLKB1 | MIR31HG | ACSL4 | DUSP1 |
| CD84 | IGES | IGH | SHBG | TRIM21 | NUP133 | DSG2 | MIR572 | APOBEC2 | CXCL16 | ZFPM2 | SPRED1 | SHOC2 |
| LRP5 | IFNAR2 | DKK1 | SHH | MIR32 | RNY5 | SLC17A3 | IL22 | ULK1 | SLC5A1 | MIR16-2 | KCNA3 | TBK1 |
| MIR124-1 | C9orf72 | SOX9 | PINK1 | C4BPA | ELP1 | ABCD4 | TBX5 | AP4B1-AS1 | WNT5A | MIR127 | NR1H4 | TRPV4 |
| B4GALT1 | ANXA2 | MIR195 | TSLP | SIGLEC1 | ACTA1 | CD34 | HDAC2 | HDAC1 | MIR132 | PROC | SLC39A7 | IGBP1 |
| SPINT2 | ZMPSTE24 | ADAMTS5 | UBA5 | KCNJ16 | ALPP | LPP | PDZK1 | POMGNT2 | GH1 | PROS1 | HBA1 | MIR138-1 |
| PGF | IDO1 | CD24 | CD58 | GALNT12 | CHIA | SMAD9 | PEBP4 | SLC30A10 | SMN1 | MIR10B | SIRT3 | TNFRSF17 |
| PRNP | ARG1 | PROCR | MIR486-2 | MT-ND1 | TBC1D8B | BLZF1 | HSPA1B | CD5L | IRF4 | TEK | AGA | MC2R |
| FBXL4 | MECP2 | CMIP | RUNX2 | FGF7 | SOST | MIR139 | MIR574 | MIR582 | MIR338 | MIR188 | MIR411 | ITLN1 |
| COL6A1 | ENO1 | ENTPD1 | UPB1 | PTGDS | JUP | FCRL6 | SI | SMURF2 | HYOU1 | MIR543 | CTSB | LOX |
| MAG | CDH16 | GREB1L | TFF3 | IL22RA1 | RNF217-AS1 | BACH1 | MIR584 | MIR103A1 | FOXP1 | CDH3 | CHIT1 | CCL26 |
| RECQL | ZMIZ1 | MYLK2 | CAV3 | TKT | H3-4 | H3C12 | H3C13 | H3-5 | H3-7 | CDKN2B | ARHGDIA | BSG |
| PTGR3 | DROSHA | CD74 | KIT | NFASC | RBM8A | MIR7-1 | ABCG2 | CCL21 | SMN2 | MICB | PRDM16 | VEGFC |
| NBL1 | MIR181C | SEMA3A | ALOX5 | FLT3 | SOAT1 | NAT2 | PDSS1 | TMEM11 | SP1 | ADAR | PYCARD | PSORS1C1 |
| DNAH11 | DNAI1 | DNAH5 | DNAAF4 | CFAP418 | MIR222 | KLK3 | PIWIL1 | NSD1 | PMPCA | NFATC1 | RPGR | REV1 |
| GBA1 | CA2 | LSM11 | ESR2 | ROCK1 | MEN1 | ERVW-1 | FCGRT | NR1H2 | ACTA2 | P3H2 | BCR | CYP2E1 |
| NLRP2 | MGAM | HPX | PSEN1 | RYR2 | EMD | MIR17HG | ITGA2B | EHMT2 | RXRB | DEDD | DDOST | DPEP1 |
| FLNB | KCNH2 | ADSL | HLTF | DVL2 | NR1I3 | MMP14 | MIR629 | MIR3613 | MIR99A | KCNN4 | HSP90AA1 | DGCR8 |
| TLN1 | TLN2 | ACVR1 | TREM1 | CRNDE | FNIP1 | DELEC1 | NPM1 | ITGA8 | FOXE3 | EPB41L3 | BCL2L11 | RECQL4 |
| MTRR | HULC | CHI3L1 | FOSL1 | SLAMF7 | MAP3K1 | NCR2 | TNFRSF4 | BRD4 | CRKL | DIS3L2 | NTRK2 | GLP1R |
| BMPR1A | UCHL1 | CXCL5 | CD209 | AFP | CXCL13 | OPTN | GOLGA2 | MYCT1 | ZNF543 | FAM20A | CASC15 | SLC7A7 |
| TRIM28 | CRYAB | PDCD4 | CD5 | HPN | AFG2B | CST9L | R3HDM2 | B3GNT4 | CST9 | TMEM171 | UBE2W | FCRLB |
| MIR5100 | COMT | OLR1 | STMN1 | CRYGD | CNR1 | VEGFB | H2AX | CDK4 | KPNA4 | PRKAR1A | SDHA | DACH1 |
| PLK1 | FLCN | CDH11 | LAMP1 | EGR1 | CDH5 | MIR382 | CXCR5 | H6PD | MIR22 | MIR191 | IKZF3 | LCN1 |
| HOTAIR | TWIST1 | GALC | GP2 | GSR | CSF3 | CCAT1 | METTL3 | RPE65 | LSM2 | HSPA5 | PPM1D | PML |
| PARG | HSP90AB1 | TYRO3 | CCR7 | ZFP36 | GLB1 | ANXA5 | SNX9 | CRYBB3 | MIR125B1 | LEPR | CLEC4A | SLC25A4 |
| PDLIM3 | FBLN1 | VAV1 | HNRNPA2B1 | PRCP | KPNA1 | CAP1 | GADD45B | FCRL2 | HECW1 | DEFA6 | FCRL1 | VWCE |
| PRAG1 | FGD5-AS1 | MIRLET7BHG | MIR630 | PNKP | SPARC | TNFRSF10B | ICAM3 | RHOD | INPP5E | CD9 | SMARCA2 | MUS81 |
| CANX | STIM2 | PDCD1LG2 | KIR2DL1 | FAM167A | MCM10 | CSN2 | TTN-AS1 | PIWIL4 | TERF2 | FABP3 | IL18R1 | SPHK1 |
| MIR135B | SERPINA3 | SDHC | ERBB3 | MT-TH | MT-TQ | SPON2 | F8 | LAMA2 | HLA-C | SYVN1 | HAMP | IFIT1 |
| NT5E | ANXA1 | CYP2R1 | MCL1 | AFF3 | TCF19 | C6orf15 | RHO | ABL1 | CCNA2 | TCHP | FMN1 | AMMECR1 |
| RTL9 | TMEM164 | SNORD96B | MIR3978 | CCL4 | VHL | ABCG1 | GRB2 | NT5C3A | SRSF2 | MIR10A | MIR34B | MIR378A |
| FMOD | KAT5 | TNFSF4 | SORD | FMR1 | GPX4 | USF1 | CD47 | ALDH2 | ANKRD26 | MAX | MIR143 | MSH6 |
| PGR | NR1I2 | BCL2L1 | NDUFS3 | NTN4 | GNG2 | WFDC2 | PHLDB1 | MIR129-2 | ZFAS1 | PPOX | CADM1 | CEACAM5 |
| TAC1 | ALOX5AP | MIR181A2 | PCAT1 | SMARCB1 | MST1R | SSB | CDKN3 | PTK2B | RPS6KB1 | TEC | PLEK | FZD7 |
| AHR | MAPT | CYP7A1 | NR0B2 | SERPINA7 | FBH1 | ZRANB3 | THY1 | MARCHF1 | RAP1B | CYP2B6 | SAFB | ELK1 |
| DUSP22 | ANXA3 | CD63 | PLA2G1B | H2AC16 | H2AC17 | MAGEL2 | AKT3 | EXOC7 | DDR2 | ACVR2A | LOXL2 | COL6A3 |
| CRYAA | GJA8 | P4HA2 | FBN2 | KIRREL3 | PTPRU | P4HA1 | GPR143 | ADAMTS17 | CHRDL1 | COL27A1 | CRYBA4 | CRYBB2 |
| CRYBA1 | CRYBB1 | SALL2 | HOXD11 | NID2 | NYX | VSX1 | GUCY2F | GPRASP2 | KCNE5 | RAB33A | NXT2 | OSBPL7 |
| RBM48 | EVI5L | FAM186B | MPV17L | HMCN2 | ZNF625 | PRR32 | MIR4651 | LINC01512 | MIR4775 | RICTOR | TNFRSF9 | IGHG1 |
| F2R | AIF1 | MIR383 | TRAF2 | CHUK | WEE1 | BECN1 | CFLAR | MUC16 | AMPD1 | ATIC | PTPN2 | FHL2 |
| APC | MAFK | PSAP | CCK | TBX21 | MIR4668 | MIR3182 | RNPC3 | MLLT3 | RARRES2 | HDAC3 | GRN | DYSF |
| NCR1 | EIF4A1 | SKP1 | RPS18 | BID | PIK3C2A | MIR362 | SIRT7 | SQSTM1 | SNRPN | SERPINF2 | BAP1 | BARD1 |
| TSHR | TRAF5 | MIR365A | YY1 | MIRLET7F2 | NTRK1 | CD2 | MIR211 | PPIA | LOC111365141 | BIRC2 | B3GAT1 | ATG5 |
| LGALS3BP | AXDND1 | NUP85 | PKD1L3 | GAST | KDM5C | DNAJC3 | BRD2 | OFD1 | NCF1 | MRC2 | POLD1 | SNHG5 |
| MUC7 | ANKRD55 | lnc-IL31RA-5 | IFT81 | ALG6 | AIM2 | USP2 | TCF7 | P2RX7 | CSNK2B | AGPAT1 | DXO | GHSR |
| RARS1 | ASXL1 | NCK1 | SPN | MIR7-3HG | MIR519D | PPBP | SNRNP70 | HSPA8 | IRAK1 | PTAFR | TRAF3 | IFNA2 |
| SLAMF1 | ERN1 | CENPB | RO60 | TSPAN32 | MIR193B | RAD51B | RECQL5 | MERTK | CFL1 | CDK6 | KAT2B | EIF4EBP1 |
| PSMA7 | CD1D | DNTT | CCNL2 | DPH1 | MYCN | ZNF7 | PFKFB3 | SLC22A8 | FOSB | ERF | HLA-DMB | LINC01554 |
| BUD23 | GNE | LOC111674472 | FABP5 | S100A1 | MIR1228 | COG5 | ATXN2 | SMPD1 | ATXN10 | FH | SDHD | SDHAF2 |
| MIR499A | PTPN6 | ALPL | MIR339 | MIR1224 | ADCYAP1 | FDCSP | CCND3 | DPYS | IDH1 | BIRC3 | CRBN | DIS3 |
| TENT5C | MIRLET7E | GDNF | PPIG | CSF2RB | KLF6 | GFAP | CHKB-CPT1B | CALCR | HSP90B1 | CDK9 | TFAM | FBXW7 |
| FAH | GADD45A | TOP2A | DDB1 | PTPN1 | P2RX4 | BTRC | ALCAM | IL19 | MIR33B | PHGDH | POMC | SLC2A4 |
| PCDH1 | PTH1R | USP14 | GAD1 | G6PC2 | CNTN1 | GPHA2 | RPS27A | EXOSC10 | ATF4 | MSTN | SKP2 | TAT |
| EPRS1 | FSCN1 | FFAR2 | CXCR6 | CMKLR1 | IL17RE | IL36A | MIR134 | MIR374B | TNFAIP8 | EXD2 | PHOX2B | LCP1 |
| ARG2 | FUS | CKAP5 | ADCY5 | PCK1 | MAEA | SMURF1 | SOX4 | RFC2 | PRKAA2 | SCARNA5 | PRKACA | EZR |
| ERCC1 | COPA | RIPK3 | AEBP1 | FZD4 | MAPK9 | WNT3A | NOG | MIR136 | MIR148A | MIR301A | MIR31 | MIR425 |
| MIR92B | MIR654 | MIR452 | MIR501 | MIR518A1 | MIR885 | MIR371A | POLI | DKK3 | ACP1 | CSF1R | CTSK | FGF8 |
| GLUL | XPO1 | FGF10 | BIRC5 | CD33 | FGF17 | PVR | CEBPB | FGF4 | FGF5 | IL3RA | PSMB10 | CD276 |
| CKS1B | CNTF | FGF18 | KLRC1 | CD200 | KLRD1 | RHD | AGFG1 | CD7 | CTRL | FGF6 | LAG3 | NCR3 |
| TIGIT | FGF16 | FGF20 | IFNA5 | CD52 | LY9 | NANOG | TNFSF9 | FGF22 | IFNA14 | IFNA6 | IFNA8 | IFNA10 |
| IFNA21 | IFNA4 | KLRC2 | IFNA13 | IFNA17 | IFNA7 | IFNA16 | MIR363 | PREP | MT-TK | GPC3 | DRD1 | PTGS1 |
| RHOB | KCNH7 | SCN1A-AS1 | TBC1D27P | ATRX | YBX3 | ACTR2 | AMN | RAB11A | CCND2 | BAK1 | SUFU | MIR513A1 |
| SFTPD | SMC3 | TRD-GTC9-1 | CYP1A2 | SLX1A-SULT1A3 | LUM | CCL24 | CTSC | SFRP2 | PCNT | CASP5 | NEK7 | NLRP6 |
| IRX2-DT | DNASE1 | NKRF | GUSB | FAR2 | IDH2 | CXCR1 | CDK7 | CYLD-AS1 | DEFB1 | BMPR2 | TNFRSF10C | GOT2 |
| CKB | CKM | CKMT2 | HBA2 | PPY | CKMT1B | INSM2 | SDC4 | TERC | MIR4516 | MFGE8 | PTCH1 | VCP |
| TARDBP | HTT | NCKIPSD | GADD45G | BRCC3 | SOCS6 | LIPA | IFNL3 | MIR500A | MMADHC | LMBRD1 | MT-TT | MT-TG |
| TLR8 | RIPK2 | TXK | TNFRSF18 | VASP | WASL | BAIAP2 | WASF2 | BGN | LMO2 | CHKA | ANXA11 | MFSD11 |
| C19orf81 | COTL1P1 | UBE4A | MIR1237 | UBE3A | EIF4E | USP7 | KDM1A | RBX1 | TCL1A | GJC2 | BBC3 | PMAIP1 |
| SAG | MIR767 | CARMN | CYP1A1 | SUCNR1 | TRPV1 | MIR302C | GDAP1 | PPP2CA | NOD1 | RPTOR | NEFL | EPAS1 |
| FGG | EGR2 | CD68 | CCN1 | DDAH1 | PLSCR3 | AURKA | PIK3R2 | PIM1 | NKX2-1 | RXRA | CDKN2C | LATS1 |
| H1-4 | NCOR2 | EIF1AX | TET3 | FUBP1 | ARID4A | H3C1 | LRRC56 | MGA | P2RY8 | BCORL1 | FAM135A | UCA1 |
| GFOD3P | MIR561 | ST3GAL6-AS1 | TET2-AS1 | LAMA5-AS1 | PDIA3P1 | CYLD-AS2 | LOC130063979 | LOC130068308 | RIT1 | NDUFS2 | PADI6 | ATF6B |
| TRMT112 | NPC1 | DMRT1 | KIR3DL1 | TICRR | RECK | RREB1 | MIR369 | MIR589 | MIR95 | ITGAE | MICU1 | PFN1 |
| TFE3 | WASF1 | CTTN | HCLS1 | ARPC2 | ACTR3 | ARPC3 | ITSN1 | TRIP10 | WASF3 | MTSS1 | ARFRP1 | FNBP1 |
| GPRC5B | MIR3074 | SH2B1 | SCT | ALDH3A2 | EPN2 | EPN3 | NUP35 | ZUP1 | NUP43 | MT-TC | EEF1D | CALB2 |
| LAMP3 | TCF21 | MYO5A | COL5A2 | RNASEH1 | DAG1 | CHAT | CNTNAP2 | ERVFRD-1 | TRIAP1 | AZGP1 | CYP20A1 | HCP5 |
| HNRNPC | GNRH1 | PSIP1 | MORC3 | TMEM107 | DCLK3 | SLC35B3 | MBL1P | SUOX | FOXM1 | TUBG1 | CASP7 | S1PR1 |
| CYP2C19 | IGKV1D-33 | BAZ1B | STX3 | OCA2 | TPP1 | MOCS1 | CTSD | SLC7A11 | TIA1 | FCN1 | CMKLR2 | ABCC2 |
| TNS1 | IBTK | TRB | GCGR | ABCA3 | ABCC1 | CSNK1A1 | EPOR | FOLR1 | FOLH1 | LIFR | FDPS | JAG2 |
| HDAC11 | HMBS | NECTIN2 | BCL2L2 | BRDT | CUL4A | HMMR | ING1 | PIM2 | CHD8 | MSLN | NDN | PSMB5 |
| PSMD14 | PUS1 | SFRP1 | BRD3 | COX4I2 | PLS3 | POU2F2 | PSMC4 | BCL2A1 | MCPH1 | MVP | NEDD8 | UCHL5 |
| MGAT3 | ULBP1 | CEP70 | GPRC5D | MAGEA1 | MAGEA3 | SPA17 | ADAT3 | MAGEC1 | MYEOV | METTL6 | ZNF141 | CTAG1B |
| DGCR5 | MIR432 | MIR1252 | INPP5B | CPAMD8 | CNTROB | OGG1 | GRK2 | RYR1 | NEDD4 | MAP3K7 | PAK1 | PAK2 |
| HBB | GIPC1 | CDK5RAP2 | ST8SIA6-AS1 | MIR1910 | SPNS1 | PRICKLE1 | GOSR2 | CATSPER1 | ELAVL1 | SNTA1 | ORAI2 | ORAI3 |
| NICOL1 | TCF4 | A2M | B3GNT2 | RCAN1 | FXN | SACS | COG2 | SP3 | BCHE | SELENBP1 | MIR7-3 | MIR7-2 |
| MIR378I | ATXN3 | PPP1R12C | PDP1 | GCLC | NEDD9 | CSF2RA | TH | FURIN | PRKACB | HNRNPA1 | ACAN | CTCF |
| MYOD1 | PRKACG | DGUOK | DUOX2 | NUP153 | OGA | RAPSN | POLG2 | SHPK | CGA | SNRPD1 | FTH1 | CES1 |
| ATP6V1E1 | BMX | ALG8 | SGCE | SNAP29 | SRD5A3 | MSTO1 | TBCK | NIPAL4 | VPREB1 | AGMX2 | ASIC1 | ASIC2 |
| PHF21A | SIM1 | MYT1L | HNRNPL | HLA-S | NR1H3 | BMAL1 | CXCL6 | MIR491 | MRTFA | ODC1 | ARRB2 | CALB1 |
| IL17C | MIR18B | F7 | IGKV1-33 | TRPA1 | LYVE1 | CCL8 | SOX11 | BBOX1 | C1QBP | SCN7A | GCA | PSD3 |
| NHERF1 | MIR23C | BACE1 | DNAJB1 | PABPC1 | APEH | DEFB103A | IDS | TGFBR3 | ASGR1 | NDE1 | RPE | AZU1 |
| LTC4S | TRIM40 | PDLIM5 | GLI1 | IL36G | RFX1 | IL17D | RABIF | ADAMTSL5 | LGALS9 | CTSG | TRIM33 | CCL23 |
| KIF1A | FOXC1 | CETN2 | LILRB3 | SFN | PWAR6 | AP2B1 | MFAP4 | KPNA2 | GRIN1 | HSD11B1 | ACHE | CLDN1 |
| TACR1 | PTBP1 | EDA | VEGFD | HSPB2 | KIF23 | GALNT18 | ENO2 | S100B | GZMA | CCL13 | ARF6 | USF2 |
| PGC | RB1CC1 | WIPI2 | CLTC | PRSS8 | EFEMP1 | SNU13 | PLA2G4A | ARRB1 | MBL3P | PDLIM1 | DISC1 | BMI1 |
| MAP3K5 | AQP3 | CXCL11 | GPR55 | VTCN1 | CRHR1 | CERT1 | UBA52 | GPIHBP1 | ROCR | MIR125B2 | MSR1 | ATF3 |
| FSHB | ROM1 | TP63 | ICA1 | HCCAT5 | PRKCZ | ITGAV | PPARD | APLNR | ZBTB16 | KRIT1 | NTS | YBX1 |
| CREM | KLF9 | MIR671 | MIR510 | LOC126806496 | CDYL | S100A6 | VTRNA1-1 | GSK3A | YWHAZ | APOD | AZIN2 | INSRR |
| ATF2 | TAGLN | PWAR4 | ATP7B | CLDN14-AS1 | LNCTSI | HDAC5 | PTGER2 | RARB | MKI67 | TRC-GCA24-1 | TBXT | UBC |
| C4BPB | HRG | LTA4H | CASQ1 | SPTB | DPP9 | C1D | CD248 | DPP8 | DLEU1 | SNHG1 | MIR766 | XPNPEP3 |

| **Table S5.** The GQYS–IgAN targets | | | | | | | | | | | | |
| --- | --- | --- | --- | --- | --- | --- | --- | --- | --- | --- | --- | --- |
| **Target names** | | | | | | | | | | | | |
| PTGS1 | AR | PPARG | PTGS2 | HSP90AA1 | DPP4 | AKR1B1 | PRSS1 | KCNH2 | F7 | ADRB2 | MMP3 | RXRA |
| ACHE | RELA | EGFR | AKT1 | VEGFA | CCND1 | BCL2 | BCL2L1 | FOS | CDKN1A | BAX | CASP9 | PLAU |
| MMP2 | MMP9 | MAPK1 | IL10 | EGF | RB1 | CD40LG | JUN | IL6 | CASP3 | TP53 | ELK1 | NFKBIA |
| ODC1 | XDH | CASP8 | SOD1 | PRKCA | MMP1 | HIF1A | STAT1 | CDK1 | HSPA5 | ERBB2 | HMOX1 | CYP3A4 |
| CYP1A2 | CAV1 | MYC | F3 | GJA1 | CYP1A1 | ICAM1 | IL1B | CCL2 | SELE | VCAM1 | CXCL8 | PRKCB |
| BIRC5 | DUOX2 | NOS3 | HSPB1 | TGFB1 | MGAM | IL2 | NR1I2 | CCNB1 | PLAT | THBD | SERPINE1 | COL1A1 |
| IFNG | ALOX5 | IL1A | MPO | TOP2A | NCF1 | ABCG2 | GSTP1 | NFE2L2 | NQO1 | PARP1 | AHR | SLC2A4 |
| COL3A1 | CXCL11 | NR1I3 | INSR | PPARA | PPARD | CRP | CXCL10 | CHUK | SPP1 | RUNX2 | E2F1 | CTSD |
| IGFBP3 | IGF2 | IRF1 | ERBB3 | PON1 | GSTM1 | PGR | NR3C2 | NOS2 | ESR2 | CDK2 | CHEK1 | ADH1B |
| LYZ | ESR1 | MAPK14 | GSK3B | CCNA2 | OLR1 | DRD1 | HTR2A | RXRB | KDR | MET | IL4 | SIRT1 |
| IKBKB | MAPK8 | SLPI | DRD2 | PCNA | PRKCD | CA2 | LTA4H |  |  |  |  |  |

| **Table S6.** DEG between control and IgAN groups | | | | | | | | | | | | | | |
| --- | --- | --- | --- | --- | --- | --- | --- | --- | --- | --- | --- | --- | --- | --- |
| **gene_id** | **BaseMean_DESeq2** | **BaseMean_control_Control** | **BaseMean_case_IgAN** | **FoldChange** | **log2FoldChange** | **p-value** | **q-value** | **Regulation** | **FPKM_IgAN1** | **FPKM_IgAN2** | **FPKM_IgAN3** | **FPKM_C1** | **FPKM_C2** | **FPKM_C3** |
| 5430403G16Rik | 26.66909264 | 40.92352875 | 12.41465652 | 0.30347702 | -1.72034082 | 0.00052315 | 0.041009176 | Down | 0.104244447 | 0.09532846 | 0.157909841 | 0.299064577 | 0.350648366 | 0.526000914 |
| A4galt | 489.6253375 | 367.963259 | 611.287416 | 1.658858303 | 0.730190659 | 0.000394936 | 0.034661817 | Up | 8.290830282 | 6.885928154 | 6.920062208 | 3.695081844 | 4.010323413 | 5.558141997 |
| Accs | 175.2579329 | 234.3352579 | 116.180608 | 0.494704942 | -1.015359783 | 5.3416E-05 | 0.007595426 | Down | 0.689772976 | 0.458746882 | 0.526160248 | 1.017602976 | 1.002937676 | 1.335106612 |
| Acer2 | 652.1632709 | 472.1175251 | 832.2090166 | 1.763931922 | 0.818794882 | 0.000372853 | 0.033200241 | Up | 3.364439359 | 3.796123956 | 3.439154527 | 1.47653064 | 2.614293686 | 1.897759937 |
| Acnat2 | 6693.725997 | 4469.397652 | 8918.054343 | 1.995622192 | 0.996838618 | 4.10391E-06 | 0.000977636 | Up | 83.96440325 | 75.92741276 | 104.752011 | 39.2647464 | 54.91783058 | 36.85451553 |
| Actn1 | 1002.256186 | 715.4905622 | 1289.021811 | 1.801507625 | 0.849204758 | 1.74656E-05 | 0.003140901 | Up | 9.82134809 | 8.307732119 | 6.763596238 | 4.147153268 | 4.913786664 | 4.657904902 |
| Adamts16 | 95.37626004 | 134.3732649 | 56.37925524 | 0.421038626 | -1.247975502 | 8.54497E-05 | 0.01096087 | Down | 0.140989698 | 0.20696803 | 0.228118349 | 0.516085754 | 0.455161416 | 0.380370452 |
| Adamts4 | 200.5396097 | 46.97782232 | 354.101397 | 7.524074498 | 2.911514133 | 5.95899E-14 | 1.21451E-10 | Up | 2.719506542 | 1.387931629 | 0.946219754 | 0.247680377 | 0.174240735 | 0.240631134 |
| Adamts5 | 523.0496498 | 730.7693129 | 315.3299866 | 0.431489445 | -1.212602825 | 8.08482E-09 | 5.14338E-06 | Down | 1.019983255 | 1.390043338 | 1.029106338 | 2.698141843 | 2.457956675 | 2.752775724 |
| Akap12 | 893.1181529 | 485.7272004 | 1300.509106 | 2.676110897 | 1.420137902 | 1.71851E-11 | 2.42482E-08 | Up | 7.703095617 | 5.278404144 | 5.786775117 | 1.865260274 | 2.422943592 | 2.690825445 |
| Alas1 | 6917.849834 | 3970.956758 | 9864.74291 | 2.484607116 | 1.313017741 | 1.12705E-09 | 9.84454E-07 | Up | 90.68032222 | 95.3172748 | 86.38808118 | 36.74830065 | 43.76462236 | 27.66143242 |
| Amigo2 | 89.6321132 | 58.75654423 | 120.5076822 | 2.056129582 | 1.03993119 | 0.000172084 | 0.018351916 | Up | 1.159545951 | 1.032465953 | 1.187303514 | 0.574770638 | 0.553459407 | 0.496942301 |
| Angpt1 | 307.1335565 | 421.5768994 | 192.6902136 | 0.457436806 | -1.128355644 | 0.000584369 | 0.044287369 | Down | 0.765125241 | 1.716206964 | 1.337818952 | 1.882547851 | 3.563421379 | 2.919517354 |
| Angptl4 | 2623.084757 | 1100.81273 | 4145.356785 | 3.765129489 | 1.912699482 | 2.81119E-14 | 6.44571E-11 | Up | 81.82212943 | 63.68594372 | 50.54458213 | 20.29587402 | 12.98444905 | 18.1066916 |
| Ankrd65 | 97.24634657 | 135.7959581 | 58.69673507 | 0.433001487 | -1.207556115 | 0.000674084 | 0.047374451 | Down | 0.600623125 | 0.878803301 | 1.299751345 | 1.47695514 | 2.241031224 | 2.707654517 |
| Apobec3 | 302.0408626 | 204.4165347 | 399.6651904 | 1.952713543 | 0.965480326 | 0.000182225 | 0.019321128 | Up | 1.934096708 | 1.311465882 | 1.590528116 | 0.922684165 | 0.598768099 | 0.920309503 |
| Arg2 | 280.7335898 | 127.653128 | 433.8140517 | 3.394889854 | 1.763364767 | 0.000213585 | 0.022260171 | Up | 18.50263164 | 4.07179675 | 5.098215164 | 2.908206508 | 1.985721594 | 3.14123968 |
| Arhgef9 | 86.42893005 | 116.7514963 | 56.10636381 | 0.480249862 | -1.058142894 | 0.000390724 | 0.034457003 | Down | 0.303016954 | 0.213503304 | 0.252301188 | 0.418896695 | 0.614309284 | 0.557003788 |
| Arid5a | 106.817962 | 55.65596074 | 157.9799633 | 2.849578709 | 1.510748642 | 4.42708E-05 | 0.006711238 | Up | 0.968047005 | 0.931039133 | 0.515570289 | 0.309546057 | 0.341254871 | 0.18714986 |
| Asns | 214.5448627 | 132.0497863 | 297.039939 | 2.241430787 | 1.164419951 | 7.08226E-05 | 0.009413761 | Up | 3.243198656 | 2.527079978 | 2.077640822 | 1.02603002 | 0.844864047 | 1.61387229 |
| Atf5 | 433.5719186 | 308.2098455 | 558.9339918 | 1.81301322 | 0.858389445 | 0.000543298 | 0.042227632 | Up | 11.37407801 | 10.5045813 | 7.064293016 | 5.87721824 | 4.713459249 | 5.188367442 |
| B4galt1 | 1953.12816 | 1380.720976 | 2525.535344 | 1.828657654 | 0.870785011 | 2.86006E-05 | 0.004769285 | Up | 22.97120325 | 18.29767479 | 16.12354338 | 8.105710009 | 10.81609177 | 12.39106983 |
| B4galt5 | 4685.334529 | 3673.964236 | 5696.704822 | 1.550565753 | 0.632794706 | 4.90866E-05 | 0.007203161 | Up | 38.34411125 | 39.26612831 | 42.79239446 | 21.42517462 | 27.57658185 | 28.24733791 |
| B4galt6 | 538.7449932 | 410.2597685 | 667.2302179 | 1.624412699 | 0.699918211 | 0.000497143 | 0.040349975 | Up | 3.527306889 | 3.2799543 | 3.118978753 | 1.606032305 | 1.945232069 | 2.543902197 |
| Bco2 | 592.1605158 | 727.9252763 | 456.3957554 | 0.627108913 | -0.673212071 | 0.00043395 | 0.036346786 | Down | 5.136255997 | 4.557094353 | 6.359705239 | 7.401439321 | 8.599356655 | 9.411645384 |
| Birc3 | 374.1595482 | 273.4718194 | 474.847277 | 1.733371282 | 0.793580708 | 0.000442563 | 0.036732702 | Up | 3.48494286 | 2.655730881 | 3.252254475 | 1.446257029 | 1.617462465 | 2.331730992 |
| Btbd8 | 192.5339516 | 279.0523754 | 106.0155277 | 0.380421502 | -1.394329302 | 1.29156E-05 | 0.002493804 | Down | 0.228691521 | 0.396628943 | 0.527012206 | 0.774691185 | 0.986921391 | 1.266366639 |
| C1qtnf2 | 93.07699621 | 137.2029394 | 48.951053 | 0.358035682 | -1.481824721 | 8.26245E-05 | 0.010673113 | Down | 0.389621017 | 1.017991095 | 1.091124635 | 2.371038034 | 2.276065403 | 2.288425721 |
| C5ar1 | 69.78512401 | 31.27095154 | 108.2992965 | 3.431822675 | 1.77897501 | 0.000201446 | 0.021236314 | Up | 1.88259793 | 1.139965177 | 0.77074749 | 0.187993524 | 0.289443412 | 0.631655919 |
| C7 | 499.9852691 | 340.2962058 | 659.6743323 | 1.935988203 | 0.953070162 | 4.39972E-05 | 0.006711238 | Up | 5.016904455 | 4.35025404 | 5.403501819 | 2.526553431 | 1.831142632 | 3.205437352 |
| Car3 | 1532.268028 | 2068.165197 | 996.370859 | 0.481832455 | -1.053396523 | 0.000106972 | 0.012824773 | Down | 23.88552951 | 12.91495343 | 21.77621978 | 42.12180199 | 46.88244743 | 30.33975404 |
| Cars | 769.0625241 | 585.0331221 | 953.091926 | 1.628794002 | 0.703804154 | 0.000578144 | 0.044187102 | Up | 8.388445538 | 5.719779497 | 6.136185405 | 4.165259844 | 3.932269572 | 4.189058282 |
| Casp4 | 106.9208422 | 36.04340237 | 177.798282 | 4.901629544 | 2.293261452 | 9.77847E-14 | 1.79367E-10 | Up | 4.456873677 | 3.172203368 | 3.130124521 | 0.648950108 | 0.608180218 | 0.914388277 |
| Cc2d2a | 536.2540639 | 708.5622587 | 363.9458691 | 0.513590744 | -0.961308892 | 3.47627E-06 | 0.000861691 | Down | 1.337617879 | 1.223211944 | 1.482693481 | 1.94745252 | 2.822066287 | 3.081700096 |
| Ccdc68 | 247.5709302 | 327.6944625 | 167.4473979 | 0.510911361 | -0.968855079 | 1.61368E-05 | 0.002959981 | Down | 2.701202456 | 2.217200482 | 2.59543062 | 5.432232852 | 4.217842037 | 4.848250008 |
| Ccl12 | 51.30186778 | 9.210524028 | 93.39321153 | 10.27034704 | 3.360413027 | 2.39432E-06 | 0.000627415 | Up | 10.6123959 | 2.677164641 | 2.445592275 | 0.848364101 | 0.543058575 | 0.097698346 |
| Ccl2 | 132.2913002 | 42.40169062 | 222.1809097 | 5.233239027 | 2.387704155 | 3.52402E-06 | 0.000861882 | Up | 7.70632896 | 8.753376199 | 8.348592587 | 2.785602474 | 0.321013947 | 1.494324075 |
| Ccl7 | 13.21850731 | 2.86437082 | 23.57264381 | 8.168223434 | 3.03002233 | 0.000259771 | 0.026181248 | Up | 1.020320182 | 0.970374699 | 0.654600479 | 0.212885374 | 0 | 0.098064257 |
| Ccr1 | 18.83471619 | 2.868982378 | 34.80045 | 12.0656143 | 3.592829464 | 1.36577E-07 | 6.77089E-05 | Up | 0.357973443 | 0.348475864 | 0.401292523 | 0.020077851 | 0.03427286 | 0.036994923 |
| Cdc14a | 343.7250193 | 428.2109057 | 259.2391329 | 0.605139807 | -0.724659605 | 0.000100801 | 0.012326667 | Down | 0.925730215 | 0.881973493 | 0.959486081 | 1.491723631 | 1.36419517 | 1.675225661 |
| Cdc42ep4 | 682.4621332 | 533.8255716 | 831.0986948 | 1.556988053 | 0.638757874 | 0.000309424 | 0.02910645 | Up | 6.600858768 | 5.442441929 | 5.452887772 | 3.739324873 | 3.71114704 | 3.665274788 |
| Cdh11 | 307.8271259 | 386.8712835 | 228.7829684 | 0.590665346 | -0.759587122 | 0.000102234 | 0.012419074 | Down | 1.214479663 | 1.081758791 | 1.016588859 | 1.663710494 | 1.789273299 | 2.118064938 |
| Cdkn1a | 699.699713 | 301.0804444 | 1098.318981 | 3.648258901 | 1.867208115 | 3.18641E-07 | 0.000127061 | Up | 27.95438757 | 9.529399973 | 11.23125306 | 3.531586415 | 5.385064145 | 4.320992449 |
| Cdkn2b | 62.79549161 | 31.73887527 | 93.85210796 | 2.945578391 | 1.558550948 | 0.000119908 | 0.014099183 | Up | 1.196872929 | 2.274853228 | 2.593026162 | 0.571260249 | 0.557223061 | 0.92101556 |
| Cdkn2c | 342.64381 | 437.69385 | 247.5937701 | 0.56530679 | -0.822894069 | 0.000136993 | 0.015416288 | Down | 3.758093293 | 3.463202994 | 2.66343657 | 5.941372824 | 5.598508883 | 5.764245755 |
| Cebpd | 451.409426 | 181.0691563 | 721.7496956 | 3.987645877 | 1.995537297 | 1.14502E-10 | 1.20967E-07 | Up | 13.65502626 | 7.672169464 | 7.462879931 | 3.068375294 | 2.003496338 | 2.004285883 |
| Cep72 | 61.02581244 | 91.24486586 | 30.80675902 | 0.336602871 | -1.570880612 | 8.63724E-05 | 0.010962002 | Down | 0.135694467 | 0.20164393 | 0.141064026 | 0.4227148 | 0.313241212 | 0.683787037 |
| Ch25h | 105.0508603 | 43.26414056 | 166.83758 | 3.851677873 | 1.945487052 | 0.000663479 | 0.046895137 | Up | 6.318037688 | 2.276047245 | 2.431030915 | 1.664433229 | 0.260441952 | 0.843381326 |
| Chac1 | 45.60919076 | 17.93507552 | 73.283306 | 4.05302689 | 2.018999747 | 1.69885E-06 | 0.000510854 | Up | 1.291807289 | 1.714818651 | 1.18821043 | 0.380385051 | 0.206132283 | 0.433882774 |
| Chil3 | 26.26972787 | 3.901175198 | 48.63828054 | 12.494445 | 3.643214914 | 1.73561E-06 | 0.00051349 | Up | 1.774101131 | 0.553977594 | 0.57835317 | 0.150470933 | 0.021404471 | 0.051985089 |
| Cib2 | 107.1226773 | 76.3408038 | 137.9045508 | 1.807773191 | 0.854213684 | 0.000627035 | 0.045762592 | Up | 2.524325524 | 2.613666692 | 2.78842259 | 1.414662027 | 1.444767621 | 1.487109725 |
| Cit | 251.1338586 | 336.3806317 | 165.8870854 | 0.493390877 | -1.019197054 | 6.05364E-05 | 0.008412263 | Down | 0.382770365 | 0.390681061 | 0.354274447 | 0.929592497 | 0.686519535 | 0.630943267 |
| Cldn4 | 554.8513565 | 289.2713396 | 820.4313734 | 2.835466291 | 1.503586005 | 7.80407E-06 | 0.001632089 | Up | 22.37136463 | 8.942104191 | 9.549147055 | 3.889740041 | 5.301114836 | 5.115252454 |
| Clec4d | 9.135182495 | 0.36003907 | 17.91032592 | 51.51630682 | 5.686957266 | 3.60579E-05 | 0.005958643 | Up | 0.41597904 | 0.335647513 | 0.457877356 | 0 | 0.0242082 | 0 |
| Clu | 10091.18563 | 5954.531994 | 14227.83927 | 2.389352425 | 1.256619664 | 8.36671E-08 | 4.38487E-05 | Up | 244.455178 | 163.9034254 | 162.522056 | 56.85304848 | 90.9353116 | 90.5918567 |
| Col5a1 | 403.9075215 | 234.1651176 | 573.6499255 | 2.44738501 | 1.291241077 | 1.14865E-05 | 0.002265562 | Up | 3.006118487 | 1.625529934 | 1.440236368 | 0.784350721 | 0.736861785 | 0.937858223 |
| Creb3l1 | 303.8018952 | 178.58337 | 429.0204204 | 2.401912545 | 1.264183623 | 8.66538E-05 | 0.010962002 | Up | 8.089993376 | 5.133884637 | 3.783913602 | 2.928369084 | 1.90834381 | 2.121400625 |
| Creld2 | 2019.839881 | 1127.414225 | 2912.265537 | 2.584272341 | 1.369758115 | 1.51623E-06 | 0.000471393 | Up | 68.06642709 | 55.09973824 | 69.38597109 | 30.10790706 | 28.00299505 | 14.72322664 |
| Csf1 | 777.980165 | 411.0894617 | 1144.870868 | 2.784770035 | 1.477558195 | 1.03438E-16 | 3.16226E-13 | Up | 7.598791754 | 7.289500946 | 6.457178747 | 2.643602368 | 2.36519179 | 2.576548456 |
| Csf2rb2 | 134.2416613 | 50.7547737 | 217.7285489 | 4.280389813 | 2.097742188 | 2.82581E-05 | 0.004755393 | Up | 2.531143148 | 0.763142537 | 0.854226005 | 0.443690845 | 0.150111269 | 0.353527853 |
| Csf3r | 94.39849168 | 33.16791047 | 155.6290729 | 4.715156393 | 2.237305623 | 4.6834E-07 | 0.000168446 | Up | 1.234823065 | 0.832388445 | 0.96197871 | 0.361923515 | 0.153578116 | 0.107377504 |
| Csrp1 | 2020.073779 | 1482.538874 | 2557.608684 | 1.725122833 | 0.786699089 | 2.97428E-07 | 0.000123993 | Up | 28.87493108 | 32.90832639 | 29.89568212 | 15.95380802 | 17.97502249 | 18.89151261 |
| Cx3cl1 | 3265.444224 | 2409.696913 | 4121.191535 | 1.710154843 | 0.774126958 | 0.00013262 | 0.015109592 | Up | 49.31733179 | 37.05497299 | 31.64984988 | 22.47220443 | 22.57984433 | 23.3100049 |
| Cxcr2 | 21.09622452 | 6.119660241 | 36.0727888 | 5.912698641 | 2.563816748 | 3.82882E-05 | 0.006262037 | Up | 0.209423822 | 0.383023769 | 0.447862467 | 0.027309607 | 0.082875478 | 0.067093291 |
| Cyp27b1 | 158.6603042 | 89.51116184 | 227.8094466 | 2.557780867 | 1.354892669 | 0.000105452 | 0.012725685 | Up | 1.055117546 | 1.2650567 | 1.358028966 | 0.438252999 | 0.71330197 | 0.272301073 |
| Cyp4a12b | 1046.897452 | 771.1243469 | 1322.670558 | 1.714722838 | 0.777975403 | 0.000646125 | 0.046660903 | Up | 13.89540614 | 19.4972852 | 16.24939778 | 10.28823012 | 7.386705167 | 11.04174872 |
| Cyp4a14 | 1808.150216 | 959.4905461 | 2656.809886 | 2.767713423 | 1.46869457 | 6.78313E-08 | 3.77039E-05 | Up | 17.91142016 | 24.70019465 | 29.71953435 | 7.412097416 | 6.353097871 | 12.33591453 |
| D17H6S56E-5 | 302.9185499 | 193.5108873 | 412.3262125 | 2.127214325 | 1.088965398 | 0.000169674 | 0.01830302 | Up | 5.070410341 | 3.28915982 | 2.652083169 | 1.736227955 | 1.342794105 | 2.049926853 |
| Defb1 | 7058.091558 | 5507.012472 | 8609.170644 | 1.563437722 | 0.644721752 | 0.000206837 | 0.021680099 | Up | 287.1888088 | 297.3508646 | 261.1180587 | 181.8768527 | 193.6645427 | 159.2141729 |
| Dennd2a | 123.457182 | 79.27836303 | 167.6360009 | 2.110262268 | 1.077422312 | 0.000309316 | 0.02910645 | Up | 1.144823065 | 1.110884433 | 0.674404054 | 0.420220817 | 0.440457366 | 0.519587933 |
| Depp1 | 601.0788212 | 129.735155 | 1072.422487 | 8.255730007 | 3.04539579 | 5.65333E-50 | 5.18495E-46 | Up | 26.46064428 | 21.47355723 | 25.48021181 | 2.244267676 | 3.167910415 | 3.439397188 |
| Dnaja1 | 16904.39554 | 11869.26723 | 21939.52384 | 1.848502769 | 0.886357204 | 9.80473E-05 | 0.012070351 | Up | 184.1094388 | 195.0143094 | 168.5385541 | 116.2988544 | 101.4147324 | 73.42762598 |
| Dnajb9 | 1488.00348 | 981.6129203 | 1994.394039 | 2.032316537 | 1.023125122 | 1.44571E-05 | 0.002705982 | Up | 29.16778637 | 33.96649647 | 33.11260547 | 10.75853049 | 20.77528251 | 15.7239332 |
| Dynlt1b | 287.0207023 | 421.1897069 | 152.8516978 | 0.362644557 | -1.463371898 | 0.000158039 | 0.017255444 | Down | 9.158584522 | 2.520331174 | 6.271768793 | 19.24169006 | 12.45865121 | 16.81019783 |
| Eif1a | 1579.342575 | 1210.838844 | 1947.846305 | 1.608512229 | 0.685726904 | 5.21771E-05 | 0.007477223 | Up | 19.32157778 | 17.72445746 | 17.17167807 | 9.075135675 | 12.19704151 | 12.28625402 |
| Eno2 | 58.66992877 | 22.81941603 | 94.52044151 | 4.134703153 | 2.047783756 | 0.000330506 | 0.030626269 | Up | 1.746772938 | 0.417917127 | 0.488662613 | 0.282524485 | 0.14066175 | 0.203348529 |
| Epha7 | 49.11023699 | 72.20852407 | 26.0119499 | 0.360227244 | -1.4730208 | 6.4879E-05 | 0.008881157 | Down | 0.052156362 | 0.082839463 | 0.061150645 | 0.159891949 | 0.176525324 | 0.206668631 |
| Epn3 | 807.3989694 | 656.3267495 | 958.4711892 | 1.460071567 | 0.546039087 | 0.000490357 | 0.039976057 | Up | 7.076342923 | 7.532066489 | 7.104631251 | 4.585287322 | 4.843589812 | 5.338121537 |
| Eps8l1 | 194.8965867 | 129.8271971 | 259.9659763 | 2.000941997 | 1.000679347 | 0.000127531 | 0.014620642 | Up | 1.19776081 | 1.535824638 | 1.931540661 | 0.752665522 | 0.656889651 | 0.901968558 |
| F2rl1 | 733.1514402 | 496.0941303 | 970.2087501 | 1.953987911 | 0.966421542 | 4.87329E-07 | 0.000171286 | Up | 11.51509472 | 9.579793921 | 10.49217202 | 4.271243539 | 5.269621379 | 6.564707622 |
| Fam110d | 227.0585082 | 126.5091446 | 327.6078718 | 2.584546901 | 1.369911383 | 0.000123934 | 0.014315827 | Up | 4.373189009 | 2.394111091 | 2.088183382 | 1.338323632 | 0.688750155 | 1.350780726 |
| Fam161a | 161.9843739 | 206.4735068 | 117.4952409 | 0.569111337 | -0.813217176 | 0.000656713 | 0.046895137 | Down | 0.707272416 | 0.546051699 | 0.625056975 | 1.169265082 | 1.055321254 | 1.030796377 |
| Fam174b | 371.8061435 | 258.0072942 | 485.6049927 | 1.879842995 | 0.910612173 | 2.46545E-05 | 0.004226522 | Up | 5.029393637 | 4.967616615 | 6.352411221 | 2.674342697 | 2.427473184 | 3.529544265 |
| Fblim1 | 432.4745148 | 266.3879575 | 598.5610721 | 2.244512021 | 1.166401823 | 1.02166E-05 | 0.002059367 | Up | 6.734521672 | 4.587723894 | 3.660448717 | 2.212303383 | 1.870216367 | 2.533149432 |
| Fbxl2 | 264.3022363 | 327.3793259 | 201.2251467 | 0.614342027 | -0.702886015 | 0.000303999 | 0.02910645 | Down | 0.795105262 | 0.775040893 | 0.852520242 | 1.207753945 | 1.223149794 | 1.483583911 |
| Fgd3 | 613.1584848 | 319.3975913 | 906.9193782 | 2.835116125 | 1.503407828 | 2.31137E-11 | 3.0284E-08 | Up | 4.675135387 | 3.846834022 | 3.934888411 | 1.070252898 | 1.390530227 | 1.928108652 |
| Fgl2 | 179.3332946 | 126.8987618 | 231.7678274 | 1.825455763 | 0.868256708 | 0.000428505 | 0.036228984 | Up | 2.177090931 | 1.871907991 | 1.483923187 | 0.867159114 | 1.089799338 | 1.055940517 |
| Fkbp5 | 4188.432725 | 2601.778456 | 5775.086994 | 2.219788674 | 1.150422337 | 9.1655E-05 | 0.011515261 | Up | 61.67028493 | 31.37282209 | 41.18210602 | 13.51495999 | 27.41255788 | 19.19244256 |
| Fn1 | 1009.438166 | 759.852549 | 1259.023783 | 1.656124321 | 0.727810976 | 0.000306363 | 0.02910645 | Up | 5.302504377 | 4.42196216 | 3.651961285 | 2.610189301 | 2.40914885 | 2.995098427 |
| Fpgs | 1785.883238 | 2116.663649 | 1455.102828 | 0.687460271 | -0.540651755 | 0.000305343 | 0.02910645 | Down | 17.01090033 | 15.647808 | 17.69708876 | 24.26194271 | 23.01459812 | 25.21787896 |
| Frem2 | 269.2564129 | 364.7134759 | 173.79935 | 0.47683322 | -1.068443347 | 0.000660351 | 0.046895137 | Down | 0.161157053 | 0.205041188 | 0.305932001 | 0.291170575 | 0.521289881 | 0.599357238 |
| Fstl3 | 242.4163793 | 171.4663023 | 313.3664563 | 1.828985889 | 0.871043945 | 1.36142E-05 | 0.002601301 | Up | 4.753845701 | 4.745238913 | 4.951903471 | 2.721237538 | 2.533717225 | 2.560667136 |
| Galnt15 | 204.6092819 | 131.7115136 | 277.5070503 | 2.104163959 | 1.073247125 | 6.78529E-05 | 0.009178141 | Up | 1.425082914 | 0.796833777 | 1.067120831 | 0.518698456 | 0.454386896 | 0.570693803 |
| Glcci1 | 562.9804273 | 686.4923306 | 439.468524 | 0.640502259 | -0.642724436 | 0.000282356 | 0.028301925 | Down | 1.85221427 | 2.191407228 | 2.289163439 | 3.024876963 | 3.400895637 | 3.390232668 |
| Glul | 16697.3566 | 13664.50252 | 19730.21067 | 1.443930991 | 0.530001793 | 0.000306431 | 0.02910645 | Up | 215.3977531 | 219.7229304 | 201.3291814 | 142.7732927 | 151.5560346 | 142.2618177 |
| Gm10685 | 22.27292377 | 35.16601464 | 9.379832898 | 0.267340192 | -1.903251347 | 0.000346006 | 0.031733901 | Down | 0.030023276 | 0.031377597 | 0.049683335 | 0.134233417 | 0.110324854 | 0.1683252 |
| Gm16062 | 37.09829096 | 18.88415112 | 55.31243081 | 2.919204566 | 1.545575312 | 0.000663847 | 0.046895137 | Up | 3.309842386 | 2.887056573 | 1.542695522 | 0.796827964 | 0.856412208 | 0.978809594 |
| Gm16252 | 66.98329674 | 107.5655406 | 26.40105288 | 0.24532256 | -2.027248184 | 3.85296E-08 | 2.27983E-05 | Down | 0.081334995 | 0.041036383 | 0.082470899 | 0.299904279 | 0.227527173 | 0.29426849 |
| Gm19792 | 20.79334769 | 3.202753474 | 38.38394191 | 11.95517768 | 3.579563667 | 0.000468567 | 0.038715837 | Up | 0.168510612 | 1.168576232 | 0.125127669 | 0.08545592 | 0 | 0.033741181 |
| Gm32461 | 814.3380036 | 1062.421642 | 566.2543649 | 0.532908403 | -0.908040513 | 0.00014612 | 0.016146271 | Down | 18.44343198 | 14.74047346 | 13.90587804 | 36.10913353 | 24.4581949 | 26.25568615 |
| Gm32960 | 199.0162692 | 268.6386551 | 129.3938833 | 0.481826532 | -1.053414255 | 0.000374736 | 0.033206655 | Down | 6.254791489 | 5.675135508 | 5.486315226 | 16.05804875 | 9.862181843 | 9.471336179 |
| Gm33945 | 65.7056676 | 27.31674381 | 104.0945914 | 3.808474684 | 1.929213306 | 4.9491E-07 | 0.000171286 | Up | 0.8692581 | 0.413353613 | 0.718793379 | 0.139047977 | 0.192635683 | 0.189369778 |
| Gm36317 | 926.9615801 | 648.7252421 | 1205.197918 | 1.858755052 | 0.894336664 | 0.000612376 | 0.04499582 | Up | 6.087779157 | 5.12864909 | 9.803595905 | 3.241284573 | 4.443769679 | 3.49647711 |
| Gm38863 | 171.3296977 | 235.33025 | 107.3291455 | 0.455378425 | -1.134862153 | 2.02217E-06 | 0.000553622 | Down | 0.2685261 | 0.245559167 | 0.272439651 | 0.510805435 | 0.494496191 | 0.711221073 |
| Gm38895 | 15.61293234 | 26.83498541 | 4.390879272 | 0.16325686 | -2.614784484 | 0.000288369 | 0.028430347 | Down | 0.066377784 | 0.242802072 | 0.088719963 | 0.692471815 | 0.591024155 | 1.169602936 |
| Gm39900 | 63.03528107 | 95.74732257 | 30.32323957 | 0.315522222 | -1.66418648 | 0.000337037 | 0.031066725 | Down | 0.322930283 | 0.157956609 | 0.147221197 | 0.933629273 | 0.386352416 | 0.619541726 |
| Gm40055 | 56.22568079 | 86.99179237 | 25.45956921 | 0.293739858 | -1.767389055 | 0.000297617 | 0.029036332 | Down | 0.024072945 | 0.066041985 | 0.050051068 | 0.23543978 | 0.125034105 | 0.107650435 |
| Gm40228 | 440.2801987 | 603.2823002 | 277.2780972 | 0.45991376 | -1.120564733 | 6.01469E-05 | 0.008412263 | Down | 10.67280104 | 7.545515704 | 16.18317851 | 19.68751671 | 27.86128044 | 26.65007163 |
| Gm41932 | 34.58473703 | 55.16488005 | 14.004594 | 0.254031568 | -1.976920309 | 4.39905E-05 | 0.006711238 | Down | 2.314411231 | 1.71962419 | 1.546710867 | 7.670938234 | 9.301947281 | 4.634187014 |
| Gm42060 | 200.3082156 | 297.0778049 | 103.5386263 | 0.349273373 | -1.517571433 | 0.000644336 | 0.046660903 | Down | 1.62104423 | 1.760346378 | 6.319464336 | 7.750962925 | 10.55797627 | 9.142465847 |
| Gm6710 | 32.35638939 | 10.06775588 | 54.64502289 | 5.316095932 | 2.410367139 | 3.05567E-06 | 0.000789438 | Up | 0.437252555 | 0.337132238 | 0.51949149 | 0.059628004 | 0.042410379 | 0.137336253 |
| Gpr153 | 130.2559538 | 75.16022625 | 185.3516813 | 2.463109098 | 1.300480531 | 2.21545E-05 | 0.003833778 | Up | 1.789626941 | 1.20705619 | 1.140078268 | 0.66175342 | 0.432617384 | 0.557778417 |
| Gpr176 | 50.84951056 | 20.14072984 | 81.55829129 | 4.059204611 | 2.021197063 | 3.74825E-07 | 0.000137508 | Up | 0.449700857 | 0.476434405 | 0.302976467 | 0.119192239 | 0.092235638 | 0.087848202 |
| Gprc5a | 140.6993441 | 81.38766121 | 200.0110271 | 2.448180598 | 1.291709987 | 0.000250448 | 0.025381019 | Up | 3.540547867 | 1.888673611 | 2.721052488 | 1.167074893 | 0.642172756 | 1.476937987 |
| Gramd1b | 7743.355458 | 4935.050322 | 10551.66059 | 2.137994493 | 1.096258137 | 3.91331E-11 | 4.48637E-08 | Up | 13.3355844 | 10.61577279 | 11.47370054 | 5.564823511 | 4.943555587 | 5.891527252 |
| Grem1 | 13.6135225 | 3.185708616 | 24.04133639 | 7.522029099 | 2.911121887 | 0.000113999 | 0.013572709 | Up | 0.259294547 | 0.492474154 | 0.568731594 | 0.069359847 | 0.039465717 | 0.063900321 |
| Gucy1a1 | 582.5752306 | 769.5530614 | 395.5973998 | 0.513974309 | -0.960231848 | 4.01226E-05 | 0.006344558 | Down | 1.995657405 | 2.865424838 | 1.745723109 | 4.194531274 | 4.117259284 | 4.468631049 |
| Havcr1 | 668.2879234 | 30.32759062 | 1306.248256 | 43.01317046 | 5.42670657 | 0.00029918 | 0.029036332 | Up | 43.82600438 | 1.792038816 | 1.329860243 | 0.282058331 | 0.115553552 | 0.696415837 |
| Hdc | 20.97169305 | 8.061223436 | 33.88216265 | 4.137059476 | 2.048605698 | 0.000521678 | 0.041009176 | Up | 0.432258048 | 0.474344623 | 0.242105731 | 0.075157303 | 0.061092095 | 0.138482884 |
| Herpud1 | 11750.11422 | 6835.645282 | 16664.58316 | 2.438128029 | 1.285773885 | 3.48218E-12 | 5.32281E-09 | Up | 239.9536537 | 235.9769126 | 260.7524563 | 100.0284965 | 114.5464553 | 83.624223 |
| Hivep2 | 622.3674751 | 426.5464427 | 818.1885074 | 1.916776394 | 0.938682046 | 1.37677E-05 | 0.002603513 | Up | 1.844075224 | 1.620429217 | 1.779942425 | 0.638837842 | 0.963960948 | 1.130543183 |
| Hmgcr | 2138.959116 | 1503.407695 | 2774.510538 | 1.844662107 | 0.883356577 | 5.06848E-05 | 0.007320555 | Up | 16.63302855 | 13.58913664 | 15.600252 | 6.784814438 | 6.761157758 | 11.24465356 |
| Hmox1 | 2011.742601 | 1484.142723 | 2539.342479 | 1.711029586 | 0.774864706 | 0.0006093 | 0.04499582 | Up | 60.40378348 | 48.1430984 | 36.43063498 | 29.70054893 | 28.21729908 | 25.80104203 |
| Hpgd | 364.0516523 | 496.3069085 | 231.796396 | 0.467265078 | -1.097686875 | 6.99377E-08 | 3.77314E-05 | Down | 3.404130016 | 4.278168277 | 4.456728742 | 8.613684027 | 7.845653696 | 9.306520476 |
| Hsp90aa1 | 22260.10707 | 17374.50698 | 27145.70715 | 1.562419151 | 0.643781538 | 0.000519 | 0.041009176 | Up | 231.9115171 | 324.5443717 | 300.2303277 | 175.0285279 | 191.6244323 | 176.9705776 |
| Hsp90ab1 | 55112.21053 | 42897.36891 | 67327.05214 | 1.569514616 | 0.650318464 | 0.000141969 | 0.015878895 | Up | 742.7533707 | 831.3721039 | 843.669699 | 489.911149 | 576.6759784 | 457.5316017 |
| Hspa4l | 2149.695159 | 1582.359214 | 2717.031103 | 1.717422018 | 0.780244593 | 0.000613256 | 0.04499582 | Up | 6.797861326 | 7.60947497 | 10.03641266 | 3.533383152 | 5.841079709 | 4.783612032 |
| Hspa5 | 32334.02595 | 22380.02463 | 42288.02727 | 1.88959903 | 0.91808013 | 5.85E-06 | 0.00129285 | Up | 468.8217722 | 458.7214839 | 529.1676669 | 267.7104374 | 290.5601417 | 200.8776581 |
| Hspa8 | 106055.0405 | 73577.63305 | 138532.4479 | 1.882820442 | 0.912895422 | 0.000356144 | 0.032181058 | Up | 1820.335721 | 1999.370556 | 2109.523469 | 1293.875412 | 1092.423926 | 697.2634343 |
| Hspb8 | 391.9874537 | 242.4477366 | 541.5271709 | 2.237326232 | 1.161775636 | 8.56678E-07 | 0.000281642 | Up | 7.236677078 | 10.33814055 | 9.239382974 | 4.100270769 | 4.416770088 | 3.344984767 |
| Hsph1 | 10030.77996 | 6154.983372 | 13906.57655 | 2.259584847 | 1.176057731 | 5.75758E-05 | 0.008123944 | Up | 54.12146727 | 67.41176821 | 73.73957522 | 36.39717467 | 31.05109143 | 17.02129736 |
| Hyou1 | 5780.626565 | 3577.018149 | 7984.234981 | 2.232458229 | 1.158633182 | 1.97799E-06 | 0.000549731 | Up | 47.95196836 | 43.97740953 | 60.76668598 | 19.41273606 | 30.45661506 | 17.71817595 |
| Icam1 | 1077.884494 | 656.2960883 | 1499.472901 | 2.284218018 | 1.191700356 | 5.66966E-08 | 3.24996E-05 | Up | 18.19129922 | 18.09709276 | 16.07390909 | 8.955064138 | 5.798244348 | 7.86409128 |
| Id1 | 653.0967739 | 864.0616066 | 442.1319413 | 0.511829347 | -0.966265224 | 0.000500772 | 0.040465498 | Down | 10.37095653 | 11.21062693 | 12.75680899 | 30.33121067 | 16.17107758 | 19.18593374 |
| Id3 | 1588.155053 | 2187.805308 | 988.5047985 | 0.451866952 | -1.146030049 | 2.42042E-07 | 0.000108271 | Down | 29.84388355 | 33.31426597 | 30.16897685 | 84.24665019 | 58.88104849 | 60.00421204 |
| Id4 | 791.6809776 | 1085.198522 | 498.1634333 | 0.459344194 | -1.122352501 | 1.08891E-05 | 0.002171065 | Down | 2.466471495 | 4.450682069 | 4.388201773 | 7.974579738 | 8.903681878 | 7.512048722 |
| Igfbp1 | 182.9826906 | 65.12454217 | 300.840839 | 4.608764007 | 2.204379896 | 8.75188E-07 | 0.000281642 | Up | 9.67827394 | 3.264849247 | 4.944386908 | 0.54222745 | 1.51071909 | 1.84315642 |
| Ikzf2 | 89.06774078 | 121.7346867 | 56.40079491 | 0.463185895 | -1.110336774 | 0.000543058 | 0.042227632 | Down | 0.146309633 | 0.158882545 | 0.168395592 | 0.217291952 | 0.389010538 | 0.417465714 |
| Il1b | 82.9367733 | 45.22665447 | 120.6468921 | 2.658053149 | 1.410369952 | 6.37601E-05 | 0.008793623 | Up | 1.696887578 | 2.137619542 | 1.913180849 | 0.873078098 | 0.411129091 | 0.845960039 |
| Il22ra1 | 180.0894202 | 253.8854514 | 106.2933891 | 0.419575049 | -1.252999207 | 3.94788E-05 | 0.006344558 | Down | 0.381629526 | 0.528615542 | 0.735119147 | 0.95140575 | 1.615719683 | 1.343993791 |
| Il36g | 6.2828321 | 0 | 12.5656642 | 70.55371056 | 6.140650054 | 6.96568E-05 | 0.00932638 | Up | 0.158790813 | 0.108907123 | 0.424476813 | 0 | 0 | 0 |
| Il4ra | 827.6585271 | 628.9177545 | 1026.3993 | 1.631272629 | 0.705997915 | 0.000518914 | 0.041009176 | Up | 7.291127086 | 5.10947396 | 5.324727752 | 3.049494259 | 3.687216387 | 4.063682098 |
| Inhbb | 133.6470721 | 55.55218028 | 211.741964 | 3.799194219 | 1.925693466 | 4.29599E-05 | 0.006711238 | Up | 2.395962015 | 1.551984059 | 0.520051402 | 0.320453248 | 0.319091031 | 0.535103271 |
| Itgb3 | 63.13709286 | 30.64061009 | 95.63357563 | 3.108306391 | 1.63612872 | 1.96058E-05 | 0.00345797 | Up | 0.444291233 | 0.501594046 | 0.498528788 | 0.076295832 | 0.179075691 | 0.21087106 |
| Jdp2 | 195.8467342 | 130.7563259 | 260.9371425 | 1.99666208 | 0.997590188 | 0.000232504 | 0.023825851 | Up | 2.281964093 | 3.177077018 | 3.758305221 | 1.705211844 | 1.293686207 | 1.560721493 |
| Kbtbd3 | 167.7066798 | 219.6501645 | 115.763195 | 0.526146929 | -0.92646236 | 0.000486245 | 0.039817851 | Down | 0.761197121 | 0.800814068 | 0.582234281 | 1.452340604 | 1.06629813 | 1.516065735 |
| Kctd12b | 204.3896643 | 262.7351308 | 146.0441979 | 0.555424147 | -0.848338197 | 9.70677E-05 | 0.012030495 | Down | 0.913828817 | 0.969864481 | 0.796446165 | 1.380127929 | 1.662971455 | 1.75765324 |
| Klf6 | 1467.625931 | 1030.697555 | 1904.554308 | 1.847697327 | 0.885728447 | 2.07325E-06 | 0.000559259 | Up | 16.47344074 | 12.15791649 | 12.06082367 | 7.08988562 | 7.301335479 | 7.413490399 |
| Large2 | 417.3461233 | 555.3300792 | 279.3621675 | 0.503498845 | -0.989939627 | 0.000430569 | 0.036228984 | Down | 2.45875547 | 2.406801262 | 4.042365988 | 7.215438533 | 4.96780985 | 5.168214885 |
| Litaf | 1251.343571 | 930.4754118 | 1572.211729 | 1.688691121 | 0.755905468 | 0.000602807 | 0.04494831 | Up | 24.21109795 | 16.36137209 | 17.97596186 | 10.2951314 | 9.752074874 | 14.42723294 |
| Lman2l | 2050.347926 | 1685.393773 | 2415.302079 | 1.433306476 | 0.519347126 | 0.000408634 | 0.035356505 | Up | 11.17104932 | 11.28140335 | 12.17486045 | 7.961093015 | 7.973579237 | 7.976215468 |
| Lrat | 95.93094752 | 127.1928276 | 64.66906739 | 0.508245395 | -0.976402857 | 0.000700376 | 0.048662889 | Down | 0.311692651 | 0.452700583 | 0.321303712 | 0.642894725 | 0.701381566 | 0.783194066 |
| Lrrn1 | 149.2995325 | 214.6094092 | 83.98965579 | 0.3921353 | -1.350576574 | 7.46471E-05 | 0.009711001 | Down | 0.400369728 | 0.684496923 | 0.930662023 | 1.172824972 | 1.963261815 | 2.007654182 |
| Maff | 192.675977 | 43.12277271 | 342.2291813 | 7.93917804 | 2.98898965 | 3.43967E-11 | 4.20626E-08 | Up | 4.649757561 | 3.002555103 | 1.953490357 | 0.67371647 | 0.191672161 | 0.310343092 |
| Manf | 4111.333261 | 2484.272249 | 5738.394273 | 2.31029238 | 1.208075444 | 3.10787E-06 | 0.000791772 | Up | 213.810069 | 174.2038434 | 208.0358784 | 108.343817 | 85.77378017 | 58.12781431 |
| Map3k6 | 235.2922359 | 64.7055568 | 405.878915 | 6.259065549 | 2.645947285 | 1.18705E-10 | 1.20967E-07 | Up | 2.866677246 | 1.333668151 | 0.897486186 | 0.309044388 | 0.180354971 | 0.313920461 |
| Mbd1 | 1589.300999 | 1183.169683 | 1995.432315 | 1.686105985 | 0.753695224 | 2.31155E-06 | 0.000614504 | Up | 10.46220362 | 8.617941225 | 10.21912373 | 5.207283724 | 5.578231648 | 6.460502002 |
| Mchr1 | 41.89213555 | 13.69191006 | 70.09236105 | 5.135070564 | 2.360384101 | 4.76219E-06 | 0.00107843 | Up | 1.090199763 | 1.338378486 | 0.439141527 | 0.168781437 | 0.221622808 | 0.167457374 |
| Medag | 75.43196307 | 4.118842473 | 146.7450837 | 35.29611062 | 5.141437312 | 2.70361E-14 | 6.44571E-11 | Up | 2.687636269 | 0.6915381 | 0.764894214 | 0.062188616 | 0.010110083 | 0.040923971 |
| Mef2c | 288.557786 | 355.4620751 | 221.6534969 | 0.624027214 | -0.680319148 | 0.00051251 | 0.041009176 | Down | 0.103840071 | 0.123605419 | 0.12664422 | 0.17449627 | 0.193411288 | 0.195608201 |
| Micall2 | 128.8023114 | 74.66753509 | 182.9370877 | 2.438989085 | 1.286283302 | 4.60547E-05 | 0.006924438 | Up | 1.36946865 | 1.537959599 | 1.120373897 | 0.563948062 | 0.348617057 | 0.724815458 |
| Mpzl2 | 199.3921359 | 261.9950958 | 136.789176 | 0.522450362 | -0.936634121 | 0.000407523 | 0.035356505 | Down | 1.110861216 | 1.007313138 | 1.405746117 | 1.558160451 | 2.650542128 | 2.519624153 |
| Mthfd2 | 178.5393703 | 103.0096539 | 254.0690868 | 2.461783732 | 1.299704027 | 0.000405484 | 0.035356505 | Up | 5.319550963 | 2.249074775 | 2.117629783 | 1.153144104 | 1.189250845 | 1.560365632 |
| Mtss1 | 3376.94231 | 2622.687176 | 4131.197444 | 1.575506237 | 0.655815466 | 4.98108E-05 | 0.007251425 | Up | 13.79753868 | 14.49319211 | 14.53132425 | 8.93570793 | 9.736902573 | 8.208235724 |
| Myof | 1022.993493 | 621.6321254 | 1424.354861 | 2.290269107 | 1.195517125 | 0.000121298 | 0.014171766 | Up | 9.061652277 | 4.436435396 | 4.367432487 | 1.798496497 | 2.685433468 | 3.310221053 |
| Nap1l5 | 149.4247342 | 205.1451411 | 93.70432734 | 0.456494164 | -1.131331678 | 4.21084E-06 | 0.00099025 | Down | 1.760553317 | 1.373213014 | 1.32268006 | 3.211152187 | 3.381070075 | 3.055162415 |
| Nfkb2 | 709.1926868 | 473.9380839 | 944.4472896 | 1.992601233 | 0.994653022 | 7.46048E-05 | 0.009711001 | Up | 3.451365749 | 2.06884018 | 2.013301978 | 1.33298271 | 1.199235665 | 1.197937343 |
| Nlrp10 | 13.81171132 | 3.88413034 | 23.7392923 | 6.115987879 | 2.612585547 | 0.0005867 | 0.044287369 | Up | 0.189597931 | 0.213392854 | 0.071476006 | 0.031697744 | 0.0216432 | 0.023362174 |
| Nmnat3 | 580.1126946 | 693.4118868 | 466.8135024 | 0.673458831 | -0.570338339 | 0.000576542 | 0.044187102 | Down | 4.375087213 | 4.084627222 | 4.632831495 | 6.359826307 | 6.482523475 | 6.397067523 |
| Nrep | 343.8488633 | 458.0853013 | 229.6124252 | 0.500528933 | -0.998474628 | 3.31921E-06 | 0.000834031 | Down | 2.750276425 | 2.449149945 | 2.397155612 | 4.437393054 | 4.324961234 | 6.338978772 |
| Nrg1 | 838.8593516 | 381.6702167 | 1296.048486 | 3.394083067 | 1.763021874 | 8.1316E-09 | 5.14338E-06 | Up | 2.608861146 | 1.312664724 | 1.112118459 | 0.429848291 | 0.47523053 | 0.568634935 |
| Nrg4 | 61.41281556 | 83.80266447 | 39.02296665 | 0.465185569 | -1.104121753 | 0.000427689 | 0.036228984 | Down | 0.384137176 | 0.324260375 | 0.351066241 | 0.744970525 | 0.711352012 | 0.796775782 |
| Ogn | 546.6567005 | 728.4828791 | 364.8305218 | 0.500995838 | -0.997129477 | 0.000143903 | 0.015997629 | Down | 3.348410319 | 5.686612455 | 3.566904651 | 8.907986399 | 8.717562039 | 7.289342411 |
| Olr1 | 22.61020985 | 0.976446689 | 44.243973 | 45.58651846 | 5.510535326 | 1.89789E-06 | 0.000549187 | Up | 0.817711419 | 0.175010674 | 0.069762504 | 0.007562586 | 0.008606215 | 0.006967312 |
| Or5m3b | 218.0900339 | 116.8670036 | 319.3130642 | 2.731260969 | 1.449567169 | 3.4244E-07 | 0.00013049 | Up | 0.922098333 | 1.075425837 | 0.937747799 | 0.461810055 | 0.244590647 | 0.350535873 |
| Osmr | 706.6882195 | 343.7902231 | 1069.586216 | 3.108499406 | 1.636218303 | 1.828E-09 | 1.45787E-06 | Up | 8.458736168 | 4.707224569 | 4.592088665 | 1.805703149 | 1.608173461 | 2.251847909 |
| P4ha1 | 3387.640446 | 2375.737838 | 4399.543054 | 1.852225747 | 0.889259943 | 8.77897E-06 | 0.001789251 | Up | 27.14454456 | 32.13313388 | 37.06002951 | 18.85929482 | 17.27954717 | 15.12182308 |
| P4ha2 | 1072.358217 | 822.067166 | 1322.649268 | 1.610139967 | 0.687186105 | 0.000664708 | 0.046895137 | Up | 16.61737395 | 15.96100062 | 18.24800026 | 10.50759537 | 12.13692816 | 8.508130213 |
| Pacc1 | 823.9005917 | 1035.043099 | 612.758084 | 0.591955518 | -0.756439325 | 1.26636E-05 | 0.002471163 | Down | 7.905111286 | 6.397940936 | 6.722243381 | 11.85076776 | 11.73727109 | 11.52617253 |
| Pcdh18 | 210.458187 | 282.5631286 | 138.3532453 | 0.488624403 | -1.033202177 | 3.85766E-05 | 0.006262037 | Down | 0.898680957 | 0.692352784 | 0.756901062 | 1.278935639 | 1.412799849 | 2.095244128 |
| Pcdh7 | 127.0602868 | 169.7503281 | 84.37024559 | 0.498245805 | -1.005070437 | 0.000593485 | 0.044433876 | Down | 0.180572585 | 0.180962501 | 0.213800164 | 0.303211852 | 0.513911364 | 0.330855566 |
| Pcsk9 | 134.6578696 | 72.41536853 | 196.9003707 | 2.723336848 | 1.445375439 | 4.78565E-05 | 0.00713408 | Up | 2.559806699 | 1.268324535 | 1.227562288 | 0.558369482 | 0.764350478 | 0.51441851 |
| Pde9a | 939.5025136 | 1163.653213 | 715.3518141 | 0.614636057 | -0.702195691 | 2.09289E-05 | 0.003656175 | Down | 5.341831192 | 5.246259063 | 4.978175725 | 8.621548883 | 7.684877574 | 8.765692997 |
| Pdia4 | 5975.977973 | 4695.534529 | 7256.421416 | 1.545504155 | 0.628077533 | 7.18544E-05 | 0.009482191 | Up | 80.61331862 | 72.98660015 | 92.85304389 | 51.80932406 | 54.06195277 | 51.78446533 |
| Pdk4 | 1734.17712 | 683.5005818 | 2784.853659 | 4.073025431 | 2.026100822 | 1.12025E-08 | 6.84955E-06 | Up | 15.98103301 | 39.85134918 | 16.27316317 | 5.325186132 | 4.570799803 | 7.878453442 |
| Peg10 | 27.66283907 | 11.61830131 | 43.70737684 | 3.763208734 | 1.911963314 | 9.55351E-05 | 0.011921094 | Up | 0.220653613 | 0.224201329 | 0.144184911 | 0.038365348 | 0.063064049 | 0.05498188 |
| Pfkp | 1611.10478 | 1204.893626 | 2017.315934 | 1.673684626 | 0.743027705 | 8.41603E-06 | 0.001734554 | Up | 14.74932903 | 12.08493058 | 13.80000206 | 6.998672073 | 7.754889942 | 9.379128508 |
| Pim1 | 386.3566414 | 233.0371751 | 539.6761077 | 2.312023569 | 1.209156105 | 9.54007E-08 | 4.86093E-05 | Up | 6.923520707 | 5.42844845 | 5.557714786 | 2.648364619 | 1.989370133 | 3.028180914 |
| Plat | 2209.811525 | 1701.982167 | 2717.640883 | 1.596806712 | 0.67518969 | 0.000284798 | 0.028391622 | Up | 34.38769877 | 30.79444119 | 26.80723132 | 20.6711778 | 18.13544692 | 18.08892769 |
| Plaur | 199.1243385 | 69.58418264 | 328.6644943 | 4.718747222 | 2.23840389 | 5.12209E-07 | 0.00017399 | Up | 11.88956398 | 3.720096857 | 3.419332265 | 1.531299924 | 1.058017905 | 1.377176936 |
| Plet1 | 746.889124 | 439.7598045 | 1054.018443 | 2.394733168 | 1.259864913 | 1.96438E-09 | 1.50136E-06 | Up | 19.17899053 | 15.06086392 | 17.23166613 | 5.31146701 | 7.235812612 | 8.893195669 |
| Ppard | 1670.952959 | 1221.78446 | 2120.121458 | 1.735882019 | 0.795668897 | 0.000724776 | 0.049837883 | Up | 22.15550444 | 15.92095527 | 20.12308807 | 9.150507864 | 14.67503145 | 9.370478452 |
| Prkar1b | 134.9639901 | 90.01807433 | 179.9099058 | 2.002429604 | 1.001751525 | 0.000424911 | 0.036228984 | Up | 1.573207725 | 1.773432509 | 1.551704283 | 0.567715807 | 1.076766667 | 0.800393105 |
| Prlr | 295.4021476 | 466.2205203 | 124.583775 | 0.267228905 | -1.903852031 | 8.64223E-07 | 0.000281642 | Down | 0.339094606 | 0.128313922 | 0.339662678 | 0.546894134 | 1.33727489 | 1.125694051 |
| Prss23 | 944.9562928 | 720.1105918 | 1169.801994 | 1.623742059 | 0.69932247 | 2.60043E-05 | 0.004416631 | Up | 9.443194418 | 8.115926736 | 8.236188035 | 4.570886092 | 5.272919299 | 5.948095312 |
| Purg | 125.8812713 | 160.67004 | 91.09250264 | 0.566366002 | -0.820193428 | 0.000628696 | 0.045762592 | Down | 0.656852801 | 0.600672437 | 0.553136682 | 0.972649723 | 1.071168751 | 1.127338384 |
| Relb | 292.2355556 | 183.0428905 | 401.4282208 | 2.190521724 | 1.131274523 | 1.56008E-05 | 0.002890566 | Up | 1.569591375 | 1.57613225 | 0.997089014 | 0.662680918 | 0.520089791 | 0.691721344 |
| Rere | 5308.39935 | 4261.017605 | 6355.781095 | 1.491774812 | 0.577029772 | 0.000114691 | 0.013572709 | Up | 5.202599973 | 5.265357487 | 5.389640068 | 3.503212762 | 3.688258406 | 3.323221691 |
| Retnlg | 25.87693012 | 1.08011721 | 50.67374302 | 51.72879274 | 5.692895617 | 2.18115E-09 | 1.60036E-06 | Up | 2.473336674 | 2.261793153 | 2.7788221 | 0 | 0.159583002 | 0 |
| Rgs16 | 36.58222628 | 11.09634109 | 62.06811148 | 5.617278152 | 2.489871243 | 3.16127E-07 | 0.000127061 | Up | 1.120996439 | 0.640698782 | 0.636783449 | 0.182727373 | 0.124766137 | 0.112229561 |
| Rhob | 2509.994083 | 1855.112625 | 3164.875541 | 1.705932996 | 0.770560983 | 0.000170627 | 0.01830302 | Up | 49.72548 | 38.99459165 | 32.56477147 | 24.56066441 | 22.34624003 | 23.40767515 |
| Rhoj | 292.5367667 | 207.3043608 | 377.7691726 | 1.818827617 | 0.863008815 | 0.000324482 | 0.030367229 | Up | 5.947609906 | 4.31056054 | 4.175507127 | 2.555166178 | 2.167116419 | 3.142422954 |
| Rnf180 | 121.5900503 | 189.3171267 | 53.86297384 | 0.284677985 | -1.812597166 | 0.000592192 | 0.044433876 | Down | 0.173822568 | 0.147601621 | 0.295021864 | 0.169103593 | 0.954009641 | 1.067347314 |
| Rnf39 | 20.4564337 | 4.31946489 | 36.59340251 | 8.309679351 | 3.054792808 | 4.82269E-05 | 0.00713408 | Up | 0.926924899 | 1.095736703 | 0.241740426 | 0.058963065 | 0.067099907 | 0.144858405 |
| Rtn4rl2 | 44.95590091 | 13.83999653 | 76.0718053 | 5.486539184 | 2.455896408 | 1.44207E-06 | 0.000456066 | Up | 1.009865945 | 0.482177502 | 0.382238005 | 0.147617209 | 0.079573372 | 0.107366689 |
| S100a8 | 79.85011155 | 12.39522869 | 147.3049944 | 11.82075495 | 3.563250273 | 6.78914E-13 | 1.13212E-09 | Up | 13.67687147 | 10.21921095 | 9.957608818 | 1.667511582 | 0.165010996 | 0.935112737 |
| S100a9 | 147.997669 | 24.12080813 | 271.8745298 | 11.14976039 | 3.478940802 | 6.32444E-26 | 3.86697E-22 | Up | 16.53269187 | 13.52121416 | 16.73291244 | 1.627110538 | 0.678938372 | 1.798842822 |
| Samd4 | 187.5149814 | 112.3309645 | 262.6989982 | 2.334301951 | 1.222991191 | 3.48579E-07 | 0.00013049 | Up | 0.655197853 | 0.66909978 | 0.517942483 | 0.214985506 | 0.264830874 | 0.306283514 |
| Sbno2 | 1252.310121 | 752.5186605 | 1752.101582 | 2.328080393 | 1.219140878 | 0.000413418 | 0.035602512 | Up | 10.09632441 | 4.555857647 | 3.62351891 | 3.015658529 | 2.252948092 | 2.457132611 |
| Sdf2l1 | 849.2374193 | 500.8471049 | 1197.627734 | 2.392905873 | 1.258763648 | 5.46668E-06 | 0.001222869 | Up | 38.53296262 | 29.35538412 | 29.49778639 | 17.10854843 | 13.71914524 | 9.003413966 |
| Sele | 23.78772812 | 4.37982258 | 43.19563365 | 9.714505231 | 3.28014052 | 1.46016E-07 | 7.04836E-05 | Up | 0.226740065 | 0.444315162 | 0.28862741 | 0.02815972 | 0.024034299 | 0.045400569 |
| Sema3f | 601.9934394 | 454.7513187 | 749.2355602 | 1.647030068 | 0.719866893 | 6.80492E-05 | 0.009178141 | Up | 4.134310323 | 3.404666574 | 3.941400335 | 1.913037254 | 2.435419809 | 2.581375292 |
| Sema6b | 114.2404 | 68.85256521 | 159.6282349 | 2.304583352 | 1.204505948 | 0.000725438 | 0.049837883 | Up | 1.368996317 | 0.989727204 | 0.791950327 | 0.355174578 | 0.319096028 | 0.688879368 |
| Sema7a | 340.7858207 | 223.2901613 | 458.2814802 | 2.051416703 | 1.036620575 | 1.68479E-06 | 0.000510854 | Up | 4.212246262 | 3.445291918 | 2.930916519 | 1.714257286 | 1.635370782 | 1.76077696 |
| Serpina3f | 28.21326867 | 13.4174927 | 43.00904464 | 3.166540214 | 1.662907401 | 0.000586272 | 0.044287369 | Up | 0.656676287 | 0.587456433 | 0.445214081 | 0.148926799 | 0.127108907 | 0.251541243 |
| Serpina3g | 287.8100999 | 76.18258942 | 499.4376103 | 6.532264979 | 2.707583314 | 7.05065E-21 | 3.23325E-17 | Up | 8.686775017 | 8.13181744 | 6.732812947 | 1.415051757 | 0.711934233 | 1.427174156 |
| Serpinb8 | 376.1735398 | 264.83118 | 487.5158996 | 1.838002149 | 0.878138453 | 0.000249277 | 0.025381019 | Up | 4.275059501 | 3.882699508 | 4.937387975 | 1.727053997 | 2.1966075 | 3.190024147 |
| Sesn2 | 1478.725506 | 1010.475953 | 1946.97506 | 1.926734675 | 0.946157916 | 0.000567177 | 0.043713143 | Up | 24.78272504 | 16.48836627 | 24.86656797 | 6.778933464 | 14.22422099 | 13.28859228 |
| Sh3pxd2b | 229.0017996 | 169.1784248 | 288.8251744 | 1.704372369 | 0.769240568 | 0.000288996 | 0.028430347 | Up | 1.159502874 | 1.048461668 | 1.237511983 | 0.579236421 | 0.624927826 | 0.803929637 |
| Slc10a2 | 2913.396298 | 2352.907536 | 3473.88506 | 1.476592265 | 0.562271506 | 0.000362234 | 0.032412024 | Up | 26.2935912 | 23.08672487 | 27.22004292 | 17.67919813 | 16.94640322 | 16.61426328 |
| Slc10a6 | 46.89447062 | 17.5394462 | 76.24949504 | 4.380088978 | 2.130960177 | 4.44144E-06 | 0.001018367 | Up | 1.633736064 | 0.717121563 | 1.09181864 | 0.312465938 | 0.29093393 | 0.170105465 |
| Slc16a3 | 29.78830413 | 11.20211868 | 48.37448958 | 4.37993312 | 2.130908841 | 0.000561402 | 0.043450622 | Up | 0.329313686 | 0.496486609 | 0.356884688 | 0.15475196 | 0.088053785 | 0.021385644 |
| Slc2a6 | 11.0019708 | 2.651315102 | 19.3526265 | 7.394411818 | 2.886435394 | 0.000682037 | 0.047750429 | Up | 0.443424088 | 0.195757751 | 0.177121785 | 0.039878668 | 0.045381883 | 0.024493131 |
| Slc5a3 | 8198.073451 | 5665.293947 | 10730.85296 | 1.894248365 | 0.921625503 | 4.84295E-09 | 3.29016E-06 | Up | 26.70284035 | 28.55270216 | 33.34716471 | 15.27133121 | 15.62132318 | 15.38887259 |
| Slc7a1 | 371.3971774 | 225.8964439 | 516.8979109 | 2.28727584 | 1.193630362 | 6.61131E-06 | 0.00142672 | Up | 2.290456338 | 1.697520959 | 2.333062109 | 0.573873074 | 1.086983938 | 1.099983542 |
| Slc7a5 | 90.22217987 | 50.71386619 | 129.7304936 | 2.553496154 | 1.352473886 | 1.6327E-05 | 0.002965201 | Up | 1.414472221 | 1.063727767 | 0.845781832 | 0.436860421 | 0.395876081 | 0.454646329 |
| Slf1 | 221.1173459 | 277.4896058 | 164.7450861 | 0.593228131 | -0.753341082 | 0.000358336 | 0.032220408 | Down | 0.907912224 | 0.949679639 | 0.96415665 | 1.335322191 | 1.531899683 | 1.86773516 |
| Slfn4 | 26.98131127 | 5.03703854 | 48.925584 | 9.831739936 | 3.297446755 | 0.000124092 | 0.014315827 | Up | 0.400966677 | 0.127212788 | 0.583323581 | 0.092481243 | 0.008095658 | 0.006553982 |
| Smad9 | 36.30876821 | 55.66607786 | 16.95145856 | 0.304064925 | -1.71754869 | 0.000224923 | 0.023178493 | Down | 0.06760798 | 0.10938357 | 0.064876885 | 0.162762823 | 0.303561431 | 0.333225029 |
| Socs3 | 310.4234422 | 64.48538503 | 556.3614993 | 8.613472616 | 3.106594993 | 1.49491E-19 | 5.48421E-16 | Up | 8.67533584 | 4.46455421 | 5.235246401 | 0.925840984 | 0.42617774 | 0.73795866 |
| Sphk1 | 250.2566942 | 76.88952857 | 423.6238597 | 5.499130187 | 2.459203442 | 2.42221E-07 | 0.000108271 | Up | 5.938964827 | 1.383963297 | 1.627777273 | 0.418628112 | 0.483960236 | 0.716256564 |
| Spsb1 | 136.0429274 | 84.99317083 | 187.0926839 | 2.201866434 | 1.138726957 | 7.8299E-06 | 0.001632089 | Up | 1.723649806 | 1.279256461 | 1.291026875 | 0.637029386 | 0.659035255 | 0.633571034 |
| Sqle | 2682.458586 | 2071.661628 | 3293.255543 | 1.589540316 | 0.668609608 | 0.000655301 | 0.046895137 | Up | 44.02824164 | 30.50421923 | 33.50765979 | 18.54345485 | 24.42138718 | 24.60149578 |
| Srd5a2 | 708.6883045 | 943.5989078 | 473.7777012 | 0.502074123 | -0.994027724 | 0.000215037 | 0.022284887 | Down | 2.859223507 | 4.650150262 | 4.281174099 | 5.411872628 | 7.725236619 | 10.42833169 |
| Stc1 | 220.8024416 | 107.9290881 | 333.6757951 | 3.089806119 | 1.627516314 | 2.5025E-07 | 0.000108271 | Up | 2.890927174 | 3.522227431 | 1.579837945 | 0.835218197 | 0.829507586 | 0.909380273 |
| Steap4 | 81.1241057 | 49.6305388 | 112.6176726 | 2.270757108 | 1.183173396 | 0.000691192 | 0.048207351 | Up | 0.749603892 | 1.028235846 | 1.456486066 | 0.352989713 | 0.52530252 | 0.542008019 |
| Sting1 | 204.2194384 | 127.7778484 | 280.6610284 | 2.19056731 | 1.131304545 | 0.000506385 | 0.040739557 | Up | 5.249659052 | 2.669884531 | 2.951745054 | 1.586357089 | 1.19425734 | 2.136023941 |
| Stip1 | 4742.0219 | 3473.151974 | 6010.891826 | 1.730937421 | 0.791553568 | 0.000613081 | 0.04499582 | Up | 77.59801218 | 83.21899962 | 88.3007245 | 56.94502506 | 49.29462398 | 34.99120425 |
| Stx11 | 73.24165656 | 36.61288955 | 109.8704236 | 3.001726934 | 1.585792741 | 3.40684E-07 | 0.00013049 | Up | 0.591948464 | 0.773313347 | 0.766075879 | 0.232801789 | 0.223097427 | 0.248342076 |
| Tacstd2 | 1298.354765 | 621.1431834 | 1975.566347 | 3.18008182 | 1.669063885 | 4.37834E-09 | 3.08892E-06 | Up | 49.77788181 | 28.40364435 | 22.70599026 | 8.651726757 | 11.53243515 | 11.36978343 |
| Tcf21 | 609.146983 | 892.6268783 | 325.6670877 | 0.364963137 | -1.454177342 | 1.78068E-09 | 1.45787E-06 | Down | 6.230592516 | 9.440527944 | 7.665716137 | 24.70336137 | 18.18279058 | 20.27419863 |
| Tenm2 | 33.87900783 | 50.5502354 | 17.20778025 | 0.339995548 | -1.556412239 | 0.00042974 | 0.036228984 | Down | 0.005465186 | 0.007688847 | 0.006742818 | 0.013888114 | 0.019131956 | 0.025589876 |
| Tent5b | 103.8380449 | 54.47146731 | 153.2046224 | 2.82355562 | 1.497513051 | 4.43758E-06 | 0.001018367 | Up | 2.357528267 | 1.829239826 | 1.846070626 | 0.496856598 | 1.017760128 | 0.617959116 |
| Tet2 | 2256.409777 | 1503.440446 | 3009.379107 | 2.001132341 | 1.00081658 | 1.79467E-05 | 0.003196086 | Up | 12.01033041 | 6.863664804 | 9.014989225 | 4.336421945 | 3.928613775 | 5.557098752 |
| Tgif1 | 581.3390315 | 347.4078678 | 815.2701952 | 2.344963951 | 1.229565745 | 3.99828E-10 | 3.86003E-07 | Up | 5.762718313 | 4.627917976 | 4.628587621 | 2.191086793 | 1.832060732 | 2.313113223 |
| Thbs1 | 2312.759252 | 1699.701304 | 2925.817199 | 1.721183151 | 0.783400622 | 0.000440704 | 0.036732702 | Up | 18.8051849 | 12.53463622 | 13.76787786 | 6.43925471 | 9.783391327 | 9.894797562 |
| Tinagl1 | 1927.971331 | 1308.594893 | 2547.34777 | 1.945962813 | 0.960484141 | 1.94609E-06 | 0.000549187 | Up | 43.25741001 | 31.00833638 | 31.27259737 | 17.22198628 | 15.65806409 | 20.93448707 |
| Tmem119 | 436.6680769 | 305.2770961 | 568.0590577 | 1.859847877 | 0.895184623 | 0.000485205 | 0.039817851 | Up | 9.412372704 | 6.854233986 | 6.29345831 | 4.774292419 | 3.108725673 | 4.063699794 |
| Tmem252 | 6540.123449 | 4785.09122 | 8295.155679 | 1.73353438 | 0.793716449 | 0.000170553 | 0.01830302 | Up | 131.467982 | 87.65720642 | 84.47855817 | 57.84468283 | 59.10128192 | 56.21615188 |
| Tmod1 | 85.94527374 | 54.5546837 | 117.3358638 | 2.149945735 | 1.104300246 | 0.000147111 | 0.016158378 | Up | 0.570296498 | 0.722521477 | 0.624624226 | 0.315033989 | 0.258596189 | 0.309268614 |
| Tnc | 459.4040661 | 195.5518077 | 723.2563245 | 3.6953513 | 1.885711521 | 1.92152E-06 | 0.000549187 | Up | 5.149640378 | 1.752801605 | 1.601660247 | 0.685047103 | 0.674233854 | 0.924512762 |
| Trem1 | 6.597103117 | 0 | 13.19420623 | 73.91292888 | 6.207754838 | 4.40595E-05 | 0.006711238 | Up | 0.063442587 | 0.190625206 | 0.072682975 | 0 | 0 | 0 |
| Trib1 | 650.8744284 | 407.0753929 | 894.6734639 | 2.197158263 | 1.135638792 | 4.00854E-05 | 0.006344558 | Up | 9.743981712 | 5.212690914 | 5.07925096 | 3.17662415 | 2.763462836 | 3.063156178 |
| Tubb2b | 411.9236351 | 303.517919 | 520.3293513 | 1.71593799 | 0.778997418 | 0.000711816 | 0.049271074 | Up | 9.558988011 | 7.186000198 | 7.653750919 | 5.234521268 | 4.896757103 | 3.868895152 |
| Tubb6 | 280.169169 | 131.5368609 | 428.8014771 | 3.256468004 | 1.703308052 | 7.27357E-06 | 0.001551386 | Up | 12.09044313 | 5.708163255 | 4.359436505 | 2.705133467 | 1.576309168 | 2.417137739 |
| Txndc11 | 1349.4944 | 1099.518159 | 1599.470642 | 1.455150795 | 0.541168665 | 0.000518076 | 0.041009176 | Up | 16.08374954 | 14.4112693 | 15.66585589 | 10.18648331 | 11.12603288 | 10.0807669 |
| Ucp2 | 2807.664737 | 1862.135772 | 3753.193703 | 2.015573188 | 1.01119017 | 2.5381E-07 | 0.000108271 | Up | 64.56971523 | 52.58370936 | 50.86118837 | 31.20289068 | 24.80315379 | 26.17014313 |
| Ugt2b37 | 3726.422696 | 5212.464719 | 2240.380672 | 0.42985987 | -1.218061662 | 0.000289837 | 0.028430347 | Down | 37.04058747 | 24.56513462 | 46.16727519 | 62.05857898 | 131.0210139 | 54.30322585 |
| Usp2 | 2914.009567 | 2302.279712 | 3525.739422 | 1.531681851 | 0.615116663 | 0.000330589 | 0.030626269 | Up | 19.49226224 | 15.89670896 | 17.71441442 | 11.18000412 | 12.62014243 | 10.46626181 |
| Uvssa | 561.5106889 | 685.7673211 | 437.2540568 | 0.637222456 | -0.650130986 | 0.000353232 | 0.032181058 | Down | 1.577432476 | 1.407922599 | 1.574124029 | 2.259277437 | 2.073311035 | 2.766167785 |
| Vangl2 | 60.97580826 | 94.4144344 | 27.53718212 | 0.290942775 | -1.781192676 | 5.93694E-06 | 0.001296443 | Down | 0.086183738 | 0.139713026 | 0.069813592 | 0.245207215 | 0.341055681 | 0.432986892 |
| Vcam1 | 645.6877602 | 369.8007642 | 921.5747562 | 2.48942424 | 1.315812111 | 1.00899E-09 | 9.25391E-07 | Up | 8.427712587 | 8.269954339 | 7.715347024 | 3.462613808 | 2.427089337 | 3.821908678 |
| Vcan | 56.45632377 | 22.20761997 | 90.70502756 | 4.079590367 | 2.028424298 | 1.9533E-07 | 9.18702E-05 | Up | 0.224261151 | 0.198988692 | 0.130582192 | 0.052118816 | 0.037344063 | 0.044459615 |
| Xbp1 | 6294.212675 | 4205.764182 | 8382.661168 | 1.993190599 | 0.995079674 | 3.58104E-06 | 0.000864302 | Up | 136.7292252 | 106.5816138 | 92.57469512 | 62.67115179 | 53.45739398 | 49.95424676 |
| Yars | 1238.524648 | 1002.467227 | 1474.582068 | 1.471356741 | 0.557147081 | 0.000355136 | 0.032181058 | Up | 18.26011612 | 18.92893407 | 18.14081019 | 11.31358421 | 13.5893674 | 12.42035525 |
| Zbtb16 | 765.5579283 | 96.54840085 | 1434.567456 | 14.82292769 | 3.889758519 | 1.19446E-54 | 2.19101E-50 | Up | 6.455530063 | 3.882279366 | 5.408692176 | 0.266093774 | 0.353938955 | 0.436173694 |
| Zeb2 | 938.2696083 | 1176.689445 | 699.8497713 | 0.594697344 | -0.749772463 | 0.000136199 | 0.015416288 | Down | 1.92781196 | 2.258166153 | 2.379422954 | 2.895910924 | 3.63251128 | 4.490255867 |

| **Table S7.** DEG between IgAN and GQYS groups | | | | | | | | | | | | | | |
| --- | --- | --- | --- | --- | --- | --- | --- | --- | --- | --- | --- | --- | --- | --- |
| **gene_id** | **BaseMean_DESeq2** | **BaseMean_control_Control** | **BaseMean_case_IgAN** | **FoldChange** | **log2FoldChange** | **p-value** | **q-value** | **Regulation** | **FPKM_GQYS1** | **FPKM_GQYS2** | **FPKM_GQYS3** | **FPKM_IgAN1** | **FPKM_IgAN2** | **FPKM_IgAN3** |
| 1700016C15Rik | 1087.787212 | 1320.805732 | 854.7686927 | 0.647399414 | -0.627272035 | 0.001033405 | 0.04078283 | Down | 22.54298433 | 27.62343788 | 26.38385911 | 49.90534641 | 35.07366746 | 31.16536129 |
| 2610035D17Rik | 165.7287538 | 91.07169883 | 240.3858088 | 2.631782005 | 1.396039993 | 1.13534E-06 | 0.000191563 | Up | 4.244217958 | 3.846968191 | 3.729963013 | 0.831428439 | 1.601518133 | 1.970354526 |
| 2610507I01Rik | 478.571614 | 387.6715087 | 569.4717194 | 1.467853124 | 0.553707616 | 0.001202775 | 0.045509553 | Up | 5.553861245 | 5.78933778 | 6.47026248 | 3.938681764 | 3.447444656 | 4.552459029 |
| 4930412C18Rik | 139.1285819 | 93.09030942 | 185.1668544 | 1.989053426 | 0.992082027 | 0.000373036 | 0.018958289 | Up | 1.329952299 | 1.523840515 | 1.390969942 | 0.535378889 | 0.979176284 | 0.572466179 |
| 9930014A18Rik | 83.89211479 | 55.41038899 | 112.3738406 | 2.032256954 | 1.023082825 | 0.000314235 | 0.016861185 | Up | 0.668535344 | 0.760126263 | 0.566078641 | 0.356861459 | 0.279719346 | 0.329341878 |
| Abcc6 | 433.5334848 | 328.3651186 | 538.7018511 | 1.638454334 | 0.712335463 | 0.00045636 | 0.021752357 | Up | 3.460760407 | 2.520826891 | 2.950918188 | 1.529406252 | 1.649907083 | 2.187923147 |
| Accs | 167.7329112 | 117.1381218 | 218.3277005 | 1.864258931 | 0.898602253 | 0.000163808 | 0.010087405 | Up | 1.024909732 | 0.949810675 | 1.193635862 | 0.689772976 | 0.458746882 | 0.526160248 |
| Acnat2 | 7168.007703 | 8991.325335 | 5344.69007 | 0.594421978 | -0.750440637 | 3.65967E-06 | 0.000497471 | Down | 60.93009323 | 53.14096996 | 45.74739651 | 83.96440325 | 75.92741276 | 104.752011 |
| Acsbg1 | 62.05774779 | 99.74103989 | 24.37445569 | 0.244237439 | -2.033643728 | 3.84461E-05 | 0.003296841 | Down | 0.194398451 | 0.196495224 | 0.264750626 | 1.69509193 | 0.442888965 | 0.509230684 |
| Acta2 | 2126.798835 | 2659.035745 | 1594.561925 | 0.599661748 | -0.737779148 | 1.17483E-06 | 0.000195993 | Down | 19.78344411 | 16.3054982 | 15.03260205 | 27.00415253 | 29.64183644 | 27.11510404 |
| Actg1 | 15089.18921 | 18133.47417 | 12044.90426 | 0.664237336 | -0.590229279 | 2.64204E-05 | 0.00246112 | Down | 196.6635149 | 178.733686 | 184.9354581 | 320.3154625 | 256.1051363 | 253.2480995 |
| Adamts1 | 1636.754907 | 2020.928813 | 1252.581002 | 0.619907522 | -0.689875085 | 0.001149509 | 0.044131045 | Down | 7.699868855 | 7.772303422 | 7.840763091 | 17.42987648 | 9.720161381 | 9.8530507 |
| Adamts16 | 96.03077726 | 56.82796358 | 135.2335909 | 2.376519515 | 1.248850248 | 1.50383E-05 | 0.001613849 | Up | 0.426470741 | 0.547938675 | 0.423753601 | 0.140989698 | 0.20696803 | 0.228118349 |
| Adamts4 | 212.7545545 | 357.0075063 | 68.50160268 | 0.191851275 | -2.381939745 | 1.46649E-12 | 1.68197E-09 | Down | 0.283528661 | 0.323652013 | 0.379241473 | 2.719506542 | 1.387931629 | 0.946219754 |
| Adamts5 | 488.1825296 | 317.7818614 | 658.5831979 | 2.071872188 | 1.050935007 | 6.41231E-08 | 1.73047E-05 | Up | 2.103540914 | 2.441101895 | 2.723572874 | 1.019983255 | 1.390043338 | 1.029106338 |
| Adamtsl4 | 140.7333132 | 211.1391438 | 70.32748264 | 0.333475095 | -1.584349076 | 6.19298E-07 | 0.000119629 | Down | 0.708540976 | 0.460076131 | 0.348763998 | 2.058239615 | 1.235859087 | 1.190380629 |
| Agap2 | 55.52496665 | 77.02337896 | 34.02655433 | 0.442607401 | -1.17590052 | 0.001346997 | 0.049437467 | Down | 0.140215986 | 0.180630338 | 0.181082474 | 0.514110358 | 0.295654234 | 0.306976635 |
| Ahsa1 | 3881.159227 | 4515.511255 | 3246.807199 | 0.719061199 | -0.475813532 | 0.000330077 | 0.017405884 | Down | 62.71984476 | 64.90017575 | 55.83592459 | 75.75797503 | 88.14384439 | 86.53879321 |
| Ahsa2 | 1875.70019 | 2328.642856 | 1422.757524 | 0.611050126 | -0.710637361 | 5.54763E-09 | 1.92084E-06 | Down | 10.2382154 | 10.94352775 | 10.03935468 | 16.53875753 | 16.92006806 | 16.71884367 |
| Airn | 181.2391332 | 124.4987825 | 237.9794838 | 1.909033066 | 0.932842091 | 0.000720824 | 0.030978558 | Up | 2.998604995 | 2.800595782 | 4.069205536 | 1.344696196 | 2.309074895 | 1.411220503 |
| Akap12 | 946.2513623 | 1311.191596 | 581.3111285 | 0.44345505 | -1.173140219 | 2.6794E-11 | 1.96678E-08 | Down | 3.064837262 | 2.798334822 | 2.595045324 | 7.703095617 | 5.278404144 | 5.786775117 |
| Alas1 | 7459.170139 | 9943.386306 | 4974.953973 | 0.500362636 | -0.998954033 | 8.18001E-08 | 2.11424E-05 | Down | 56.95464123 | 48.95950737 | 32.95964248 | 90.68032222 | 95.3172748 | 86.38808118 |
| Alcam | 905.3976125 | 1094.771103 | 716.0241219 | 0.654215899 | -0.612161274 | 0.000778808 | 0.03250143 | Down | 4.33469858 | 4.471113819 | 4.10684649 | 7.921569237 | 4.884688528 | 6.625379804 |
| Amz1 | 106.9837942 | 72.89047089 | 141.0771175 | 1.933554159 | 0.951255175 | 0.000585566 | 0.026273152 | Up | 1.554990151 | 1.383150741 | 1.830329047 | 0.767052773 | 0.979799052 | 0.67264161 |
| Ankrd1 | 78.35083569 | 109.1390579 | 47.56261347 | 0.435435874 | -1.199467822 | 0.001211928 | 0.045761499 | Down | 0.827933141 | 0.676322089 | 0.940180794 | 2.630102168 | 1.846207117 | 1.039757758 |
| Ankrd65 | 101.4601776 | 59.17392762 | 143.7464276 | 2.423197098 | 1.276911755 | 4.03224E-05 | 0.003397106 | Up | 2.222988732 | 2.673572816 | 1.976695476 | 0.600623125 | 0.878803301 | 1.299751345 |
| Ano5 | 57.50479676 | 28.50544264 | 86.50415089 | 3.032354849 | 1.600438589 | 9.42475E-05 | 0.006601285 | Up | 0.306084854 | 0.393264327 | 0.299224661 | 0.057992248 | 0.174248636 | 0.088585062 |
| Anxa2 | 2043.835319 | 2593.174769 | 1494.495868 | 0.576359757 | -0.79495849 | 0.000826754 | 0.034080356 | Down | 35.36362033 | 28.46514325 | 30.60167444 | 79.91905985 | 42.06520558 | 39.36667975 |
| Anxa6 | 1990.107112 | 2311.036543 | 1669.177681 | 0.722505054 | -0.468920416 | 0.001154537 | 0.044231558 | Down | 17.54724018 | 21.18174362 | 18.17902947 | 28.73629762 | 25.37156617 | 23.19467698 |
| Aqp2 | 5439.312409 | 6875.085554 | 4003.539263 | 0.582263263 | -0.780256499 | 4.06055E-05 | 0.003402518 | Down | 87.02438373 | 74.44754442 | 95.12722761 | 157.129481 | 103.6613526 | 174.1817446 |
| Arhgef39 | 655.9118476 | 494.2290178 | 817.5946774 | 1.653670585 | 0.725671875 | 0.000162633 | 0.01004874 | Up | 11.35099298 | 8.182304228 | 11.04086142 | 6.942637196 | 5.054413243 | 6.234360975 |
| Arid5a | 112.3062218 | 159.2153859 | 65.39705769 | 0.411435409 | -1.281262136 | 2.43941E-05 | 0.002307506 | Down | 0.360346625 | 0.347611957 | 0.304129803 | 0.968047005 | 0.931039133 | 0.515570289 |
| Arid5b | 1700.344732 | 2006.324185 | 1394.36528 | 0.695033617 | -0.524845336 | 0.00017173 | 0.010503437 | Down | 4.540934425 | 4.313007144 | 3.854635772 | 5.715036715 | 6.45187912 | 5.784480547 |
| Arrdc3 | 5720.964124 | 7140.340118 | 4301.588129 | 0.602419511 | -0.731159597 | 0.000197878 | 0.011676058 | Down | 26.1099849 | 25.27923163 | 21.62600408 | 34.50926235 | 30.63150024 | 54.25261087 |
| Arsg | 1958.163581 | 1529.857057 | 2386.470105 | 1.560173257 | 0.641706249 | 0.000214862 | 0.012411154 | Up | 7.81992552 | 9.022475773 | 7.613299746 | 4.792136721 | 6.2839422 | 4.273364882 |
| Arvcf | 1431.619962 | 1112.269903 | 1750.970021 | 1.573809791 | 0.654261188 | 0.000531647 | 0.02445175 | Up | 10.9991692 | 9.608486705 | 11.20780361 | 5.305673116 | 8.345713866 | 6.185037887 |
| Asns | 232.2531124 | 299.4335347 | 165.0726901 | 0.55288991 | -0.854935851 | 0.000920715 | 0.036971652 | Down | 1.120422272 | 2.000998476 | 1.301953303 | 3.243198656 | 2.527079978 | 2.077640822 |
| Atf3 | 148.2942241 | 254.6446513 | 41.94379681 | 0.164525859 | -2.60361374 | 9.22591E-11 | 6.04659E-08 | Down | 0.603388764 | 0.563544725 | 0.75865431 | 6.895382627 | 2.676487563 | 1.944928282 |
| Atf4 | 3647.024274 | 4548.674006 | 2745.374542 | 0.603533721 | -0.728493715 | 0.000126629 | 0.008211192 | Down | 50.36533827 | 42.05327376 | 51.6976565 | 101.43871 | 70.94228233 | 62.65669959 |
| Atp2a2 | 17104.27357 | 20210.74456 | 13997.80258 | 0.692587521 | -0.529931702 | 0.000281711 | 0.015340319 | Down | 84.87636042 | 83.30855609 | 72.28703704 | 97.04193173 | 114.1250575 | 129.9832653 |
| Atxn1 | 1081.781896 | 801.6434525 | 1361.920339 | 1.697790354 | 0.763658324 | 2.29636E-05 | 0.002206307 | Up | 1.556125658 | 1.451416225 | 2.046203822 | 0.850229545 | 1.004894669 | 1.073275493 |
| Azin2 | 125.3569398 | 86.07718621 | 164.6366934 | 1.914046226 | 0.936625672 | 0.000861969 | 0.034995567 | Up | 1.108807618 | 1.767404992 | 1.585154154 | 0.670934874 | 0.960339249 | 0.64983019 |
| B4galt1 | 2137.212154 | 2545.925387 | 1728.498921 | 0.679139678 | -0.558219772 | 0.001054976 | 0.041455808 | Down | 14.1284233 | 14.33467874 | 11.23601932 | 22.97120325 | 18.29767479 | 16.12354338 |
| B4galt6 | 538.4266573 | 672.5951822 | 404.2581324 | 0.601186259 | -0.734116061 | 1.64326E-06 | 0.000262221 | Down | 2.113986793 | 2.033784014 | 1.924627497 | 3.527306889 | 3.2799543 | 3.118978753 |
| Bag3 | 1334.621722 | 1742.277276 | 926.9661681 | 0.532287972 | -0.909721129 | 5.002E-10 | 2.57191E-07 | Down | 9.492630627 | 12.40986602 | 10.62500447 | 21.41610778 | 18.48997429 | 20.10455911 |
| Bahcc1 | 451.4917243 | 321.5130585 | 581.47039 | 1.808267975 | 0.854608492 | 0.000115682 | 0.007581699 | Up | 1.490122721 | 1.811079387 | 1.149664728 | 0.617692996 | 0.790806737 | 1.00540103 |
| Baiap3 | 91.96957382 | 53.41304556 | 130.5261021 | 2.436502428 | 1.28481166 | 0.000109989 | 0.00726173 | Up | 0.837380252 | 0.535764072 | 0.571165473 | 0.166407688 | 0.323985278 | 0.291775534 |
| Banp | 492.2457355 | 679.7989882 | 304.6924827 | 0.44820824 | -1.157758921 | 6.31271E-08 | 1.72902E-05 | Down | 1.789439303 | 1.335740941 | 1.048815839 | 2.755058312 | 2.834910032 | 3.574791671 |
| Bcat1 | 1053.508875 | 1607.74863 | 499.2691193 | 0.310280848 | -1.688353445 | 8.69141E-10 | 3.79753E-07 | Down | 1.542485986 | 1.193956621 | 2.24054098 | 6.223784687 | 3.049705049 | 6.597223118 |
| Bcl11b | 192.3026054 | 146.4041642 | 238.2010466 | 1.627183166 | 0.702376659 | 0.001106204 | 0.0428269 | Up | 0.544121512 | 0.531360921 | 0.604542314 | 0.355337594 | 0.373687564 | 0.284964665 |
| Bcl9 | 442.8936273 | 344.057676 | 541.7295786 | 1.573832929 | 0.654282399 | 4.82774E-05 | 0.003802313 | Up | 1.318656782 | 1.289365152 | 1.392887377 | 0.799805629 | 0.886911882 | 0.809750849 |
| Bhlhe40 | 2836.109856 | 3480.414379 | 2191.805333 | 0.62993894 | -0.6667161 | 0.000729368 | 0.031017302 | Down | 22.40758219 | 27.36194421 | 14.45415585 | 31.97695906 | 32.73757551 | 35.1839872 |
| Birc3 | 378.5172443 | 478.7497324 | 278.2847563 | 0.581466641 | -0.782231669 | 6.17085E-05 | 0.00469198 | Down | 1.471827194 | 2.053954796 | 2.029930396 | 3.48494286 | 2.655730881 | 3.252254475 |
| Bmal1 | 859.6486158 | 1042.622257 | 676.6749746 | 0.6486658 | -0.624452719 | 0.001035683 | 0.040785023 | Down | 1.19803846 | 0.914196912 | 1.074937813 | 1.706918825 | 1.238190383 | 1.900454648 |
| Bnc2 | 1328.357588 | 1003.737372 | 1652.977805 | 1.646460861 | 0.719368217 | 4.63806E-05 | 0.003718543 | Up | 3.355179981 | 4.526737991 | 4.21899261 | 1.93491107 | 2.541135541 | 2.733766368 |
| Bnip5 | 21.71570656 | 9.876870749 | 33.55454236 | 3.40125654 | 1.766067826 | 0.001324875 | 0.048820845 | Up | 0.129034656 | 0.229550496 | 0.171213063 | 0.039604952 | 0.067261175 | 0.045373398 |
| Brca2 | 49.58895065 | 26.69492572 | 72.48297558 | 2.703756986 | 1.434965488 | 0.000681183 | 0.02955176 | Up | 0.171465027 | 0.161358256 | 0.215387415 | 0.032688335 | 0.099641714 | 0.065536412 |
| Btg2 | 628.9640465 | 760.9319792 | 496.9961139 | 0.653126411 | -0.614565846 | 0.000288667 | 0.015626363 | Down | 4.188497578 | 5.110915355 | 5.361779823 | 8.164811922 | 6.322265119 | 7.587144411 |
| Bysl | 545.5762933 | 640.1161295 | 451.0364572 | 0.704469987 | -0.505389851 | 0.00093933 | 0.03755478 | Down | 3.629150924 | 3.46211941 | 3.543927264 | 5.301482006 | 4.475718208 | 5.071625066 |
| C1qtnf2 | 100.7157254 | 49.33278716 | 152.0986637 | 3.070359209 | 1.61840745 | 1.61639E-05 | 0.001704735 | Up | 3.486624787 | 1.927036025 | 2.40878744 | 0.389621017 | 1.017991095 | 1.091124635 |
| C3 | 716.9004345 | 915.6778808 | 518.1229883 | 0.565976116 | -0.821186921 | 1.08668E-07 | 2.73356E-05 | Down | 2.840237113 | 3.112117623 | 3.094376425 | 5.938122403 | 4.965280234 | 4.804614173 |
| C5ar1 | 70.66577344 | 109.1785801 | 32.15296683 | 0.294969802 | -1.761360829 | 3.40228E-06 | 0.00046704 | Down | 0.348122448 | 0.392225876 | 0.397346687 | 1.88259793 | 1.139965177 | 0.77074749 |
| C7 | 510.5463537 | 665.0713433 | 356.021364 | 0.534866193 | -0.902750076 | 1.25573E-05 | 0.00141374 | Down | 1.999521285 | 2.634899954 | 3.399604564 | 5.016904455 | 4.35025404 | 5.403501819 |
| Capg | 410.453976 | 542.1029295 | 278.8050225 | 0.514061702 | -0.95998656 | 0.000519767 | 0.024147463 | Down | 4.001498616 | 3.451849017 | 5.348273829 | 12.14948711 | 6.675289759 | 5.707950456 |
| Casp4 | 113.6795626 | 179.2493483 | 48.10977693 | 0.268228792 | -1.898463987 | 4.09444E-12 | 3.75685E-09 | Down | 1.001426786 | 0.926391185 | 1.007293198 | 4.456873677 | 3.172203368 | 3.130124521 |
| Cbx7 | 1083.497907 | 859.7213382 | 1307.274477 | 1.520574283 | 0.604616296 | 9.28451E-05 | 0.006530752 | Up | 5.060868358 | 6.698091302 | 6.286558327 | 3.609203927 | 4.057632638 | 3.975849134 |
| Cc2d2a | 507.7296958 | 366.9131551 | 648.5462365 | 1.766373875 | 0.82079074 | 2.31613E-07 | 5.38017E-05 | Up | 2.455191411 | 2.30483522 | 2.50135224 | 1.337617879 | 1.223211944 | 1.482693481 |
| Ccl12 | 49.78758015 | 94.19374442 | 5.381415881 | 0.056066653 | -4.156713231 | 2.33825E-10 | 1.34092E-07 | Down | 0.389472813 | 0.098980803 | 0.416759964 | 10.6123959 | 2.677164641 | 2.445592275 |
| Ccl2 | 123.6882588 | 223.9509591 | 23.42555856 | 0.103917818 | -3.266485057 | 1.14173E-29 | 4.19038E-26 | Down | 1.073017619 | 0.691146354 | 0.871044575 | 7.70632896 | 8.753376199 | 8.348592587 |
| Ccl7 | 12.23491526 | 23.75874747 | 0.711083063 | 0.027545464 | -5.182041401 | 1.78242E-05 | 0.001827324 | Down | 0 | 0 | 0.079680164 | 1.020320182 | 0.970374699 | 0.654600479 |
| Cd79a | 17.61426751 | 4.926894789 | 30.30164023 | 6.223046833 | 2.637621104 | 0.000454649 | 0.021752357 | Up | 0.892888913 | 0.767743317 | 1.082839118 | 0.32625807 | 0 | 0.116286313 |
| Cdc42ep3 | 321.8015774 | 180.1147714 | 463.4883834 | 2.569804786 | 1.36165877 | 2.7335E-07 | 6.19289E-05 | Up | 6.344147721 | 5.831909139 | 5.465648854 | 1.259454521 | 2.879334667 | 2.586055662 |
| Cdh11 | 306.0774924 | 230.6252758 | 381.529709 | 1.654067653 | 0.726018244 | 9.07193E-05 | 0.006452671 | Up | 1.918461864 | 1.676592815 | 1.975889953 | 1.214479663 | 1.081758791 | 1.016588859 |
| Cdkn1a | 682.2825037 | 1107.654458 | 256.9105493 | 0.232038423 | -2.107564376 | 4.82461E-05 | 0.003802313 | Down | 3.764430181 | 4.79463789 | 2.946678923 | 27.95438757 | 9.529399973 | 11.23125306 |
| Cdr2 | 2384.171696 | 3200.985536 | 1567.357856 | 0.489654365 | -1.03016435 | 1.12047E-08 | 3.48504E-06 | Down | 18.66537001 | 17.98624815 | 19.19720136 | 48.3314867 | 29.75432278 | 34.20171986 |
| Cebpb | 800.9536297 | 1049.672884 | 552.2343757 | 0.526523012 | -0.925431509 | 0.000742354 | 0.031389247 | Down | 10.33374807 | 13.75272405 | 9.081649076 | 29.76221544 | 20.26479598 | 11.66724016 |
| Cebpd | 442.6476155 | 727.707166 | 157.588065 | 0.216691854 | -2.206283172 | 4.49169E-20 | 1.03034E-16 | Down | 2.124522495 | 2.183183665 | 2.03332497 | 13.65502626 | 7.672169464 | 7.462879931 |
| Cep131 | 151.1439935 | 99.60943461 | 202.6785523 | 2.030275902 | 1.021675794 | 3.18415E-05 | 0.002809251 | Up | 1.134585686 | 1.189620928 | 1.587117099 | 0.597541136 | 0.565495315 | 0.730564743 |
| Cep72 | 53.11864015 | 31.04438167 | 75.19289864 | 2.424306654 | 1.277572199 | 0.00038311 | 0.01915655 | Up | 0.324942382 | 0.467959052 | 0.391861866 | 0.135694467 | 0.20164393 | 0.141064026 |
| Ces1g | 905.1533241 | 380.752513 | 1429.554135 | 3.755002401 | 1.90881383 | 0.000835998 | 0.034241375 | Up | 15.04804525 | 32.88912857 | 9.340750054 | 4.084597104 | 6.504024713 | 4.225018558 |
| Cfh | 5701.835752 | 4640.033976 | 6763.637529 | 1.457705386 | 0.543699169 | 0.000103162 | 0.007016692 | Up | 46.75264534 | 52.47637924 | 41.82543252 | 28.29480402 | 33.86730824 | 32.74674514 |
| Ch25h | 95.84879089 | 168.2487808 | 23.44880097 | 0.139096863 | -2.845838211 | 1.522E-10 | 9.31006E-08 | Down | 0.807783395 | 0.349548606 | 0.397146704 | 6.318037688 | 2.276047245 | 2.431030915 |
| Chac1 | 48.03522524 | 73.85164265 | 22.21880783 | 0.30222838 | -1.726288954 | 8.18044E-06 | 0.001007512 | Down | 0.494190396 | 0.490298791 | 0.305085141 | 1.291807289 | 1.714818651 | 1.18821043 |
| Chil3 | 26.03153889 | 49.0521741 | 3.01090368 | 0.06006486 | -4.057334974 | 4.96262E-08 | 1.40106E-05 | Down | 0.039473845 | 0.035111655 | 0.105598629 | 1.774101131 | 0.553977594 | 0.57835317 |
| Chrdl1 | 140.9461634 | 182.3041063 | 99.58822044 | 0.545981405 | -0.873076277 | 0.000182245 | 0.011001257 | Down | 0.368178885 | 0.456149628 | 0.506538187 | 0.836014727 | 0.790873152 | 0.766346284 |
| Cirbp | 627.0701348 | 468.9048997 | 785.2353699 | 1.674350527 | 0.743601589 | 0.000221979 | 0.012690158 | Up | 14.37475561 | 10.27389316 | 13.03491601 | 8.873287346 | 5.836643863 | 7.490499768 |
| Ckap4 | 381.2015543 | 488.1960012 | 274.2071074 | 0.562231734 | -0.830763208 | 0.000230769 | 0.013030289 | Down | 2.619059128 | 3.139542049 | 2.802555019 | 6.807366242 | 3.876607873 | 4.297008634 |
| Cldn4 | 548.0995491 | 827.3374733 | 268.8616248 | 0.325364896 | -1.619869489 | 7.41497E-08 | 1.94389E-05 | Down | 4.18041522 | 5.650864316 | 3.698399676 | 22.37136463 | 8.942104191 | 9.549147055 |
| Cldn7 | 533.0860798 | 668.3214548 | 397.8507049 | 0.595434409 | -0.7479855 | 0.000172281 | 0.010503437 | Down | 8.497254459 | 8.014652078 | 8.367815624 | 17.84171335 | 11.3572215 | 11.92855071 |
| Clec14a | 305.6697934 | 223.6720738 | 387.667513 | 1.734108278 | 0.794193983 | 0.00080758 | 0.033453495 | Up | 2.378440464 | 3.301976919 | 2.109180818 | 1.130754837 | 1.824392251 | 1.437553993 |
| Clec2d | 1311.220358 | 1669.632531 | 952.8081855 | 0.570819349 | -0.808893857 | 0.000222911 | 0.012703829 | Down | 19.87508081 | 19.66252675 | 17.8039289 | 40.63124297 | 36.76037034 | 21.1098907 |
| Clec4d | 10.25043663 | 18.05799915 | 2.442874107 | 0.139138549 | -2.845405917 | 0.000815031 | 0.033686128 | Down | 0.044644446 | 0.099277153 | 0.023886157 | 0.41597904 | 0.335647513 | 0.457877356 |
| Clu | 10591.38118 | 14344.32594 | 6838.436429 | 0.476786032 | -1.068586123 | 7.65324E-07 | 0.000140445 | Down | 76.06992137 | 126.9887569 | 74.96314109 | 244.455178 | 163.9034254 | 162.522056 |
| Cntrob | 179.6429216 | 134.402513 | 224.8833302 | 1.67426178 | 0.743525119 | 0.000294926 | 0.01587153 | Up | 0.975567435 | 1.137636304 | 1.088870787 | 0.67029718 | 0.58957124 | 0.620072327 |
| Col6a2 | 438.0037943 | 562.5482555 | 313.4593332 | 0.557206858 | -0.84371508 | 0.000104818 | 0.007045836 | Down | 1.462859072 | 1.499689191 | 1.772294069 | 3.696361802 | 2.415858415 | 2.247454388 |
| Col6a3 | 1046.660417 | 1383.927475 | 709.3933579 | 0.512704085 | -0.963801704 | 7.41686E-05 | 0.005423887 | Down | 2.120368579 | 1.905594688 | 1.910364594 | 5.696397398 | 2.97353155 | 2.72571347 |
| Coq10b | 1233.182783 | 1521.715812 | 944.649754 | 0.620907353 | -0.687550078 | 5.60895E-07 | 0.000113463 | Down | 16.43420522 | 17.02127125 | 16.11247407 | 27.82418436 | 26.77267628 | 23.80131875 |
| Cpm | 1120.676937 | 937.7260354 | 1303.627839 | 1.389884697 | 0.474965203 | 0.001200511 | 0.045509553 | Up | 7.778579778 | 7.164509785 | 6.988482884 | 4.647673646 | 5.617073349 | 5.230623784 |
| Creb3l1 | 312.3836533 | 432.5036902 | 192.2636164 | 0.444242592 | -1.170580375 | 2.05339E-05 | 0.002025897 | Down | 2.757693894 | 2.009079308 | 2.908747026 | 8.089993376 | 5.133884637 | 3.783913602 |
| Creb3l3 | 15.7806963 | 2.050132666 | 29.51125994 | 14.46848865 | 3.854842323 | 0.000388579 | 0.019327852 | Up | 0.052160017 | 1.032308754 | 0.111628879 | 0.014294298 | 0.052286848 | 0.012737088 |
| Creld2 | 2284.624958 | 2936.174451 | 1633.075464 | 0.556142574 | -0.846473313 | 1.53486E-05 | 0.001628109 | Down | 47.79469387 | 30.9804109 | 29.87646897 | 68.06642709 | 55.09973824 | 69.38597109 |
| Crem | 512.5632215 | 639.0674702 | 386.0589728 | 0.604678134 | -0.725760684 | 0.000335612 | 0.0176399 | Down | 1.196692383 | 1.427988811 | 1.228053824 | 2.720372055 | 1.783015328 | 1.75972771 |
| Cry1 | 258.601057 | 346.8828692 | 170.3192448 | 0.491259341 | -1.025443256 | 2.40562E-05 | 0.002287336 | Down | 1.252289609 | 1.300663007 | 1.340027223 | 3.592153037 | 1.976964133 | 2.233986674 |
| Cry2 | 357.7846909 | 274.6258159 | 440.9435659 | 1.606323806 | 0.683762744 | 0.000389829 | 0.019334488 | Up | 2.998104328 | 3.929667059 | 2.784001447 | 1.753846065 | 1.986739105 | 2.189304816 |
| Cryab | 3691.158405 | 4839.110545 | 2543.206264 | 0.52552842 | -0.928159308 | 6.17457E-09 | 2.06017E-06 | Down | 41.32984211 | 34.4575646 | 37.58304466 | 84.80095919 | 62.16752176 | 65.39529484 |
| Csf1 | 748.5992815 | 1154.028035 | 343.170528 | 0.297146763 | -1.750752432 | 1.42181E-24 | 4.34861E-21 | Down | 1.847301515 | 2.093791561 | 2.518839052 | 7.598791754 | 7.289500946 | 6.457178747 |
| Csf2rb | 95.12573032 | 133.8399403 | 56.41152029 | 0.42287422 | -1.241699484 | 9.79767E-05 | 0.006759285 | Down | 0.40375063 | 0.380898435 | 0.26838731 | 1.099760742 | 0.760406285 | 0.591557418 |
| Csf3r | 96.70006232 | 156.9113627 | 36.48876199 | 0.230999628 | -2.114037567 | 3.00365E-11 | 2.12E-08 | Down | 0.212420065 | 0.177494607 | 0.323733989 | 1.234823065 | 0.832388445 | 0.96197871 |
| Csrp1 | 2093.214523 | 2577.922294 | 1608.506752 | 0.624042703 | -0.68028334 | 3.06403E-07 | 6.85708E-05 | Down | 18.54697466 | 21.0629572 | 18.70215673 | 28.87493108 | 32.90832639 | 29.89568212 |
| Ctnnal1 | 1111.280629 | 1411.376148 | 811.1851101 | 0.574947472 | -0.798497939 | 9.90401E-05 | 0.006785507 | Down | 5.973700042 | 6.766428501 | 6.236319978 | 14.78621038 | 8.302032802 | 9.377837771 |
| Ctps | 842.755124 | 1026.457221 | 659.0530271 | 0.642242435 | -0.638810103 | 0.000112725 | 0.007414366 | Down | 5.541634535 | 7.119055691 | 6.756356873 | 11.09104223 | 8.381053565 | 10.25056882 |
| Cx3cl1 | 3442.066766 | 4154.521991 | 2729.611541 | 0.657069041 | -0.605883126 | 0.000425257 | 0.020699954 | Down | 25.42120622 | 26.31592291 | 27.18196046 | 49.31733179 | 37.05497299 | 31.64984988 |
| Cxcl1 | 48.95182423 | 86.83064073 | 11.07300774 | 0.127138026 | -2.9755325 | 6.48017E-07 | 0.000122595 | Down | 0.124910952 | 0.361098554 | 0.568065338 | 5.168952728 | 1.064324791 | 1.921646537 |
| Cxcl10 | 240.3224137 | 325.0874892 | 155.5573383 | 0.477057022 | -1.067766375 | 6.37875E-06 | 0.000818577 | Down | 4.469310443 | 3.083957744 | 5.246189779 | 8.373186682 | 9.693475786 | 8.281201429 |
| Cxcr2 | 19.68567611 | 36.35905375 | 3.012298475 | 0.085914874 | -3.540948263 | 1.12603E-06 | 0.000191563 | Down | 0.019104734 | 0.059477254 | 0.010221623 | 0.209423822 | 0.383023769 | 0.447862467 |
| Cygb | 350.7439312 | 461.6161292 | 239.8717332 | 0.518957411 | -0.946311948 | 2.17316E-05 | 0.002132607 | Down | 3.795589596 | 2.652685528 | 3.9546333 | 7.883394046 | 6.336596786 | 5.505377953 |
| Cyp27b1 | 172.259431 | 229.6334016 | 114.8854604 | 0.500719444 | -0.997925616 | 1.63538E-05 | 0.001706042 | Down | 0.705857744 | 0.670662829 | 0.497818864 | 1.055117546 | 1.2650567 | 1.358028966 |
| Cyp2c68 | 28.59717244 | 10.39207173 | 46.80227315 | 4.462298585 | 2.157787052 | 7.13597E-05 | 0.00530171 | Up | 1.02892489 | 0.522982908 | 0.768961585 | 0.071612396 | 0.2128341 | 0.223338499 |
| Cyp7b1 | 5622.883105 | 6590.655973 | 4655.110237 | 0.706348699 | -0.501547529 | 0.001330683 | 0.048936611 | Down | 65.38430955 | 59.7480134 | 48.58152255 | 74.34298194 | 90.10209801 | 76.85847685 |
| D17H6S56E-5 | 310.7560441 | 415.6804702 | 205.8316181 | 0.496216292 | -1.010958991 | 0.000252272 | 0.014071241 | Down | 2.060688047 | 2.273505687 | 1.230292927 | 5.070410341 | 3.28915982 | 2.652083169 |
| D730005E14Rik | 13.23781901 | 22.91910343 | 3.556534581 | 0.154798196 | -2.691539432 | 0.000323091 | 0.017185626 | Down | 0.04960769 | 0.022062813 | 0.017694431 | 0.172201307 | 0.240353521 | 0.153441837 |
| Dbp | 346.4528713 | 162.2361279 | 530.6696146 | 3.270218993 | 1.70938725 | 8.18071E-10 | 3.66156E-07 | Up | 5.159487059 | 7.888198005 | 4.668896237 | 1.100064885 | 2.405596611 | 1.779320944 |
| Dclk1 | 19.76465035 | 33.91034627 | 5.618954422 | 0.164529966 | -2.603577731 | 0.000435922 | 0.021017959 | Down | 0.012958788 | 0.007684489 | 0.01617782 | 0.142052688 | 0.054126241 | 0.02320589 |
| Dclre1c | 282.4721454 | 218.9690448 | 345.975246 | 1.579687794 | 0.659639455 | 0.000496822 | 0.023258114 | Up | 0.714731691 | 0.736806052 | 0.727229826 | 0.482315958 | 0.368588413 | 0.506445941 |
| Dcun1d3 | 937.8541377 | 1128.817635 | 746.8906403 | 0.661804825 | -0.595522284 | 0.000474709 | 0.022452037 | Down | 4.004203443 | 3.503858767 | 3.066923032 | 5.331392274 | 5.825335117 | 4.52826509 |
| Ddit3 | 438.5279387 | 550.8576673 | 326.1982101 | 0.592483446 | -0.755153249 | 0.000674509 | 0.029401222 | Down | 4.059237384 | 3.850672541 | 3.753603394 | 8.873654785 | 5.198108685 | 5.305688816 |
| Ddit4l | 543.1278486 | 665.4094165 | 420.8462807 | 0.632900169 | -0.659950143 | 0.000531134 | 0.02445175 | Down | 4.077165072 | 5.313170206 | 4.691202614 | 8.770478798 | 5.757068247 | 7.354692593 |
| Ddn | 346.7995285 | 271.0198875 | 422.5791695 | 1.558384157 | 0.640050916 | 0.000152811 | 0.009573408 | Up | 3.50055427 | 3.248475861 | 3.515429193 | 2.228935817 | 1.990335905 | 2.258721707 |
| Depp1 | 823.9442493 | 1081.198969 | 566.6895292 | 0.523588918 | -0.933493534 | 4.63685E-05 | 0.003718543 | Down | 15.05843253 | 8.278312469 | 15.60460693 | 26.46064428 | 21.47355723 | 25.48021181 |
| Dgkg | 494.3283163 | 302.902983 | 685.7536496 | 2.263871535 | 1.178792094 | 2.03172E-06 | 0.0003107 | Up | 0.881764789 | 1.311782663 | 1.042689134 | 0.326707452 | 0.648612633 | 0.420836384 |
| Dixdc1 | 295.1430523 | 184.9879822 | 405.2981225 | 2.186795854 | 1.128818546 | 1.28328E-05 | 0.001427239 | Up | 0.703902695 | 0.854291789 | 0.977208786 | 0.263202165 | 0.333263889 | 0.543225604 |
| Dnaja1 | 17273.50947 | 22113.89933 | 12433.1196 | 0.562253818 | -0.830706542 | 4.01519E-09 | 1.53506E-06 | Down | 110.5931117 | 114.0640056 | 89.28958321 | 184.1094388 | 195.0143094 | 168.5385541 |
| Dnaja4 | 1982.415666 | 2568.392811 | 1396.438522 | 0.543803234 | -0.878843363 | 6.69571E-07 | 0.000124114 | Down | 13.97929204 | 15.56422631 | 11.01042157 | 20.00450942 | 24.44221722 | 28.74887994 |
| Dnajb1 | 2619.919285 | 3656.950572 | 1582.887998 | 0.432960889 | -1.207691388 | 2.63289E-12 | 2.84043E-09 | Down | 14.21350763 | 16.53099039 | 13.90397878 | 42.42644983 | 30.46937464 | 28.36243706 |
| Dnajb2 | 1895.246554 | 2261.094796 | 1529.398312 | 0.676481902 | -0.563876757 | 1.90752E-05 | 0.001912839 | Down | 13.82702259 | 13.37310526 | 12.44810012 | 20.95508977 | 18.02906641 | 18.63072852 |
| Dnajb4 | 1320.452043 | 1709.446382 | 931.4577034 | 0.545017509 | -0.875625518 | 1.06787E-10 | 6.75742E-08 | Down | 4.301998748 | 4.834470236 | 4.226076124 | 7.529818174 | 8.455248187 | 8.078067129 |
| Dnajb9 | 1586.827186 | 2010.286041 | 1163.368331 | 0.578851047 | -0.78873594 | 1.34584E-07 | 3.27352E-05 | Down | 20.00425447 | 20.60987309 | 16.15272872 | 29.16778637 | 33.96649647 | 33.11260547 |
| Dpt | 133.2026819 | 186.3167336 | 80.08863014 | 0.428722913 | -1.221882572 | 0.000803252 | 0.033349486 | Down | 1.044570567 | 0.99107924 | 2.198251537 | 4.77102432 | 2.687583651 | 2.261677137 |
| Dqx1 | 350.3217582 | 266.5726139 | 434.0709025 | 1.629165936 | 0.704133554 | 0.000837795 | 0.034241375 | Up | 4.208610458 | 3.336952588 | 3.848254688 | 2.911754211 | 2.031615446 | 1.945912558 |
| Dusp1 | 1430.421094 | 1751.910967 | 1108.93122 | 0.632605164 | -0.660622763 | 2.04337E-05 | 0.002025897 | Down | 18.24362397 | 14.53376623 | 19.0288295 | 26.83292867 | 25.96955391 | 27.80973395 |
| Dusp8 | 132.6719158 | 176.9109813 | 88.43285036 | 0.502180402 | -0.993722367 | 0.001321086 | 0.048779178 | Down | 0.325928849 | 0.734441166 | 0.412704064 | 1.179021787 | 0.805912707 | 0.896707268 |
| Dynll1 | 2751.207163 | 3282.613517 | 2219.800809 | 0.676225429 | -0.564423827 | 0.000598403 | 0.026658028 | Down | 33.28469202 | 31.54937896 | 35.63257641 | 57.69393608 | 48.55890224 | 39.76852836 |
| Ece1 | 2594.220326 | 2200.832592 | 2987.608061 | 1.357500682 | 0.440952923 | 0.000947428 | 0.037796217 | Up | 19.24238437 | 17.2403819 | 16.58595728 | 12.81187892 | 13.38730587 | 12.207608 |
| Egr2 | 70.31828021 | 128.2613354 | 12.37522502 | 0.096092072 | -3.379438786 | 0.000259083 | 0.014320553 | Down | 0.049249955 | 0.017522969 | 0.05621386 | 0.914183518 | 0.177730957 | 0.173181212 |
| Ehf | 696.8366107 | 836.9131376 | 556.7600838 | 0.665593033 | -0.587287763 | 0.00118787 | 0.045319342 | Down | 3.554790437 | 3.86150425 | 3.271980213 | 6.241647272 | 4.055377282 | 5.506377701 |
| Eif1a | 1637.057547 | 1963.533827 | 1310.581268 | 0.667756279 | -0.582606457 | 7.41865E-05 | 0.005423887 | Down | 12.85086572 | 13.62832565 | 10.39726389 | 19.32157778 | 17.72445746 | 17.17167807 |
| Eif2ak3 | 1475.533078 | 1764.180042 | 1186.886114 | 0.67270755 | -0.571948644 | 0.000189755 | 0.011305835 | Down | 8.123381536 | 7.454547664 | 6.588222126 | 9.482287347 | 10.78995975 | 12.11145356 |
| Elf3 | 576.8904758 | 732.9333318 | 420.8476197 | 0.574227499 | -0.800305673 | 0.00060317 | 0.026800921 | Down | 5.532071836 | 6.167493854 | 7.419518094 | 15.31576097 | 8.714394003 | 8.738916396 |
| Eno2 | 58.30261276 | 95.33560751 | 21.26961801 | 0.223259833 | -2.163204379 | 0.000103792 | 0.007028338 | Down | 0.083380679 | 0.230739965 | 0.287494647 | 1.746772938 | 0.417917127 | 0.488662613 |
| Esm1 | 1274.122146 | 902.8303886 | 1645.413904 | 1.822568301 | 0.865972881 | 1.69225E-07 | 4.03306E-05 | Up | 19.1017088 | 27.82607834 | 24.33984635 | 12.35824613 | 11.84143571 | 14.18394419 |
| Esrp1 | 459.0802914 | 552.8342243 | 365.3263585 | 0.661137029 | -0.596978776 | 0.001259348 | 0.047163882 | Down | 2.983000354 | 2.85385921 | 2.532690935 | 4.88430279 | 3.329199365 | 4.24946048 |
| Ets1 | 1099.270588 | 921.5284674 | 1277.012709 | 1.386002402 | 0.470929758 | 0.000356301 | 0.018270832 | Up | 6.894001409 | 7.767071083 | 6.845437497 | 5.094553281 | 4.874606615 | 5.272786869 |
| Etv6 | 1797.443802 | 2109.753194 | 1485.134409 | 0.703922377 | -0.506511746 | 0.000411174 | 0.020175016 | Down | 8.76353707 | 7.369576861 | 6.894278621 | 10.91189602 | 10.53467332 | 10.71735139 |
| Evpl | 731.4840907 | 471.6701897 | 991.2979917 | 2.100959808 | 1.071048563 | 2.7861E-12 | 2.84043E-09 | Up | 4.374438385 | 4.719743963 | 4.320118158 | 1.998813612 | 1.867881905 | 2.409420567 |
| F13a1 | 30.37770126 | 51.31565416 | 9.439748363 | 0.187406455 | -2.415757447 | 9.51278E-05 | 0.006637608 | Down | 0.024454686 | 0.114199254 | 0.039252037 | 0.536138723 | 0.202241732 | 0.203036188 |
| Fam110d | 234.6588135 | 330.305564 | 139.012063 | 0.420648801 | -1.249311864 | 1.74043E-05 | 0.001804445 | Down | 1.493807971 | 0.994558162 | 1.292173749 | 4.373189009 | 2.394111091 | 2.088183382 |
| Fam131c | 61.40092853 | 83.18126104 | 39.62059602 | 0.474652784 | -1.075055549 | 0.000981525 | 0.03898695 | Down | 0.674069972 | 0.763101316 | 1.027301076 | 1.612161796 | 1.740462629 | 1.735812161 |
| Fam13a | 1653.208874 | 1196.904266 | 2109.513483 | 1.761786061 | 0.817038744 | 0.000193218 | 0.01143788 | Up | 13.66429937 | 15.07081296 | 15.9373692 | 5.642691464 | 7.72270224 | 11.58267745 |
| Fam163a | 371.5784723 | 262.5910303 | 480.5659142 | 1.82831595 | 0.870515403 | 2.20995E-06 | 0.000329714 | Up | 2.963348341 | 3.470466807 | 3.459892003 | 1.502101608 | 1.75932579 | 2.05055304 |
| Fam180a | 9.15793578 | 16.37159247 | 1.944279086 | 0.118536208 | -3.076600286 | 0.00114289 | 0.043968922 | Down | 0.038958184 | 0.034652979 | 0.041687663 | 0.533818724 | 0.195264567 | 0.228319174 |
| Fasn | 2558.583004 | 3025.148976 | 2092.017033 | 0.691453031 | -0.53229684 | 2.80049E-05 | 0.002553023 | Down | 6.390941818 | 5.834687836 | 5.991510775 | 8.851086895 | 7.988046231 | 9.078958571 |
| Fblim1 | 450.0710552 | 603.4149046 | 296.7272057 | 0.492110039 | -1.022947146 | 1.06747E-05 | 0.001255491 | Down | 2.852081304 | 2.500028897 | 2.146978371 | 6.734521672 | 4.587723894 | 3.660448717 |
| Fbln5 | 3744.232412 | 2796.490432 | 4691.974392 | 1.677683407 | 0.746470493 | 8.80909E-05 | 0.006339434 | Up | 21.99408614 | 21.87222115 | 22.76216404 | 9.955448952 | 16.90936229 | 12.06152523 |
| Fbxo21 | 1495.031145 | 1135.666564 | 1854.395725 | 1.63265651 | 0.707221299 | 0.001117639 | 0.043087787 | Up | 12.20772496 | 16.81976039 | 14.10610544 | 5.751823137 | 10.64188896 | 9.469391021 |
| Fgd3 | 677.7735672 | 914.2816487 | 441.2654856 | 0.483368636 | -1.048804231 | 6.15036E-07 | 0.000119629 | Down | 2.064249171 | 2.653089963 | 1.420685545 | 4.675135387 | 3.846834022 | 3.934888411 |
| Fgfrl1 | 651.5364756 | 510.0628841 | 793.0100672 | 1.555066298 | 0.636976089 | 0.000689562 | 0.029830714 | Up | 7.091125324 | 9.313873633 | 10.30636364 | 6.114438746 | 5.912567686 | 4.833375982 |
| Fgl2 | 181.5716815 | 233.6222301 | 129.521133 | 0.55618779 | -0.84635602 | 0.000526353 | 0.024330235 | Down | 1.028634561 | 1.273908412 | 0.829760352 | 2.177090931 | 1.871907991 | 1.483923187 |
| Fhl2 | 597.4019651 | 493.9200856 | 700.8838447 | 1.418686294 | 0.50455561 | 0.000711002 | 0.030628143 | Up | 12.41589366 | 12.20390019 | 12.52286448 | 8.253777488 | 9.11666921 | 8.33976278 |
| Fkbp5 | 3862.910187 | 5823.500008 | 1902.320367 | 0.32671755 | -1.613884141 | 1.61609E-13 | 1.97713E-10 | Down | 16.24726781 | 16.30950835 | 12.02037028 | 61.67028493 | 31.37282209 | 41.18210602 |
| Flacc1 | 69.13172135 | 42.19114387 | 96.07229882 | 2.269908688 | 1.182634263 | 0.001063208 | 0.041601125 | Up | 0.4948031 | 0.572160187 | 0.998428908 | 0.294444235 | 0.255088928 | 0.345220684 |
| Flna | 4565.826475 | 5199.334655 | 3932.318295 | 0.75638057 | -0.40281579 | 0.000690864 | 0.029830714 | Down | 13.75563606 | 14.36056128 | 12.47435781 | 17.89791875 | 17.1608795 | 17.65037012 |
| Flvcr1 | 672.3202507 | 907.2363878 | 437.4041135 | 0.482619636 | -1.051041482 | 5.58958E-06 | 0.000727477 | Down | 1.83976281 | 4.035809157 | 2.893439536 | 6.129124935 | 5.992127268 | 5.66606654 |
| Fmo4 | 1174.262493 | 939.102699 | 1409.422287 | 1.500444788 | 0.585390233 | 3.06975E-05 | 0.00276142 | Up | 9.654762847 | 8.862164333 | 10.25944813 | 6.59994844 | 5.948084434 | 6.319734954 |
| Fosb | 49.91870557 | 94.1005915 | 5.736819649 | 0.05953962 | -4.070006186 | 1.84815E-11 | 1.41314E-08 | Down | 0.078979051 | 0.007025121 | 0.050707477 | 0.406906715 | 1.227151959 | 0.578582918 |
| Fosl2 | 744.9581502 | 958.147201 | 531.7690993 | 0.555244834 | -0.848804029 | 0.000429974 | 0.020874226 | Down | 1.764669281 | 2.566148266 | 2.505722301 | 5.757061168 | 3.183283983 | 3.159387936 |
| Fpgs | 1792.466048 | 1466.918214 | 2118.013882 | 1.443574789 | 0.529645853 | 6.78049E-05 | 0.005099539 | Up | 26.13476246 | 23.11422221 | 24.63246183 | 17.01090033 | 15.647808 | 17.69708876 |
| Frzb | 847.1833721 | 993.5092069 | 700.8575372 | 0.705242874 | -0.503807912 | 0.00021507 | 0.012411154 | Down | 7.271785155 | 7.085940795 | 7.453397172 | 10.45666054 | 9.808018814 | 10.13554687 |
| Fstl3 | 226.1281409 | 315.8906612 | 136.3656206 | 0.431812026 | -1.211524673 | 5.04543E-10 | 2.57191E-07 | Down | 2.336324076 | 2.132471213 | 1.879093274 | 4.753845701 | 4.745238913 | 4.951903471 |
| G0s2 | 947.5672967 | 693.6324321 | 1201.502161 | 1.732164614 | 0.792576042 | 0.000169609 | 0.01040967 | Up | 42.38118937 | 34.73979624 | 52.12656496 | 31.45011691 | 20.35555511 | 21.76954262 |
| Gadd45g | 711.1686531 | 886.0731203 | 536.2641859 | 0.605811805 | -0.723058403 | 0.000582369 | 0.026193744 | Down | 14.45604495 | 17.7172891 | 13.01864056 | 31.05801779 | 24.00449998 | 18.1083929 |
| Gdpd3 | 202.4288591 | 265.4853783 | 139.3723399 | 0.525164034 | -0.929159978 | 0.000789087 | 0.032835664 | Down | 4.328170319 | 3.576654645 | 3.94416813 | 10.80519073 | 5.962206084 | 5.455003992 |
| Gfpt2 | 75.44990877 | 104.0910009 | 46.80881667 | 0.451330907 | -1.147742518 | 0.001312265 | 0.048649258 | Down | 0.400686042 | 0.534610327 | 0.428758811 | 1.369970788 | 1.004150845 | 0.596385849 |
| Gimap8 | 384.5814973 | 311.5302947 | 457.6326998 | 1.468955502 | 0.554790694 | 0.000638887 | 0.028048344 | Up | 3.620392958 | 3.751129483 | 3.729299555 | 2.433512636 | 2.616211764 | 2.370481591 |
| Gjb2 | 2632.657302 | 2090.687125 | 3174.627478 | 1.518365213 | 0.602518844 | 0.000436371 | 0.021017959 | Up | 40.90047774 | 38.75304316 | 40.34121533 | 22.3833122 | 32.14583541 | 22.97418953 |
| Gldc | 4142.014917 | 5216.854314 | 3067.175521 | 0.587972566 | -0.766179251 | 1.81106E-06 | 0.00028165 | Down | 20.78153316 | 28.93518672 | 24.44856917 | 37.43807459 | 37.9659423 | 48.4464306 |
| Glipr2 | 116.7282202 | 158.8415933 | 74.61484713 | 0.469215451 | -1.091677574 | 0.000640881 | 0.028068742 | Down | 1.462321188 | 0.827732483 | 1.058988453 | 2.849740625 | 2.606003421 | 1.558202032 |
| Gm10804 | 2970.548334 | 2349.238875 | 3591.857794 | 1.528799568 | 0.612399276 | 7.97296E-07 | 0.000143443 | Up | 39.17836482 | 36.89982675 | 35.61294446 | 22.83788633 | 23.71759047 | 25.25306665 |
| Gm10845 | 223.7654057 | 155.2918562 | 292.2389553 | 1.879561672 | 0.910396254 | 2.8639E-05 | 0.002588938 | Up | 2.129549278 | 2.551712842 | 3.154466933 | 1.282948008 | 1.358462908 | 1.452618148 |
| Gm12576 | 514.1289156 | 369.1678288 | 659.0900024 | 1.784547666 | 0.835558437 | 3.51931E-07 | 7.68843E-05 | Up | 12.14430707 | 11.67584827 | 14.08650939 | 7.08064728 | 7.118759935 | 6.6782515 |
| Gm12781 | 132.3960316 | 93.24129269 | 171.5507705 | 1.839101679 | 0.879001245 | 0.000469726 | 0.022273769 | Up | 4.404165143 | 4.253251058 | 4.497289675 | 2.069054344 | 2.926430884 | 2.015727551 |
| Gm13528 | 207.4124617 | 132.9048864 | 281.920037 | 2.116369346 | 1.081591427 | 1.72853E-06 | 0.000271113 | Up | 1.30996893 | 1.264833727 | 1.604975013 | 0.576524222 | 0.566267243 | 0.79911711 |
| Gm13816 | 22.64927066 | 10.32615497 | 34.97238634 | 3.388545868 | 1.7606663 | 0.001357069 | 0.049707737 | Up | 0.160799097 | 0.173678621 | 0.276532979 | 0.062952164 | 0.074838257 | 0.039265944 |
| Gm15889 | 900.1355525 | 1084.839835 | 715.4312697 | 0.659745782 | -0.600017872 | 0.000839678 | 0.034242055 | Down | 17.94788133 | 18.62523882 | 12.92480682 | 23.10234387 | 21.98963905 | 28.64275029 |
| Gm16252 | 57.74861042 | 26.62617392 | 88.87104692 | 3.338902472 | 1.739373954 | 2.32747E-06 | 0.000341691 | Up | 0.266089476 | 0.229856931 | 0.197122273 | 0.081334995 | 0.041036383 | 0.082470899 |
| Gm17586 | 214.1832632 | 159.3446369 | 269.0218896 | 1.688109599 | 0.755408573 | 0.000724837 | 0.031017302 | Up | 4.280740146 | 3.464991145 | 3.939364446 | 2.268039954 | 2.674816251 | 1.853709539 |
| Gm19696 | 324.4536357 | 229.4025035 | 419.504768 | 1.827022433 | 0.869494348 | 9.10453E-06 | 0.001106472 | Up | 11.32936218 | 9.440162023 | 13.08842399 | 6.456774928 | 5.71835063 | 6.064372588 |
| Gm31255 | 31.71709962 | 13.99701676 | 49.43718247 | 3.529603386 | 1.81950608 | 7.07139E-05 | 0.005275087 | Up | 0.090854191 | 0.072307302 | 0.076752312 | 0.026208759 | 0.01438028 | 0.026467411 |
| Gm31718 | 432.3339674 | 269.1858485 | 595.4820863 | 2.214038696 | 1.146680437 | 3.26437E-08 | 9.82039E-06 | Up | 1.593460697 | 1.652763569 | 1.861753778 | 0.904227337 | 0.807134096 | 0.555480384 |
| Gm31754 | 107.7060683 | 74.84667979 | 140.5654569 | 1.8750976 | 0.90696569 | 0.000678878 | 0.02952152 | Up | 0.988191334 | 1.272031315 | 1.186380118 | 0.484377216 | 0.595967236 | 0.721965076 |
| Gm32245 | 82.16914372 | 43.35217002 | 120.9861174 | 2.779797561 | 1.474979822 | 0.000134355 | 0.00860997 | Up | 1.258667815 | 0.927935622 | 1.97781013 | 0.298321448 | 0.682015327 | 0.487341345 |
| Gm32652 | 174.1002355 | 119.3305201 | 228.869951 | 1.913079112 | 0.935896535 | 0.000190957 | 0.011340631 | Up | 1.331681057 | 1.078284266 | 1.744483436 | 0.667698835 | 0.652494105 | 0.816612132 |
| Gm33945 | 68.47032366 | 104.9787342 | 31.96191311 | 0.304345698 | -1.716217123 | 1.07725E-05 | 0.001255491 | Down | 0.298161458 | 0.169284335 | 0.149343103 | 0.8692581 | 0.413353613 | 0.718793379 |
| Gm36572 | 37.66374202 | 16.53240314 | 58.7950809 | 3.551920654 | 1.828599354 | 0.000240922 | 0.013520376 | Up | 0.169828611 | 0.088553076 | 0.263190976 | 0.057775067 | 0.049898389 | 0.037180793 |
| Gm38863 | 158.8215068 | 108.1999596 | 209.4430539 | 1.934784867 | 0.952173159 | 1.27457E-05 | 0.001426192 | Up | 0.463247847 | 0.522080268 | 0.563181812 | 0.2685261 | 0.245559167 | 0.272439651 |
| Gm39606 | 192.116917 | 128.2983903 | 255.9354438 | 1.993363532 | 0.99520484 | 2.5703E-06 | 0.000374346 | Up | 3.069648688 | 2.521852575 | 2.714450885 | 1.42541428 | 1.207339379 | 1.467938065 |
| Gm39900 | 55.57045501 | 30.57496426 | 80.56594575 | 2.641559118 | 1.401389698 | 0.000610411 | 0.027057126 | Up | 0.479571394 | 0.450950446 | 0.747763471 | 0.322930283 | 0.157956609 | 0.147221197 |
| Gm41804 | 21.82248844 | 9.548987997 | 34.09598888 | 3.564279914 | 1.833610641 | 0.001317765 | 0.048754647 | Up | 0.077683661 | 0.085778028 | 0.114656987 | 0.032300516 | 0.010741042 | 0.034014765 |
| Gm44008 | 223.8376915 | 309.6245938 | 138.0507891 | 0.445883853 | -1.165260139 | 5.2737E-08 | 1.46633E-05 | Down | 0.492876343 | 0.515594138 | 0.453125292 | 1.015888345 | 0.894205811 | 1.315448309 |
| Gm45606 | 144.0354512 | 99.19196255 | 188.8789398 | 1.901197732 | 0.926908586 | 0.000217751 | 0.012487324 | Up | 0.556972101 | 0.528087217 | 0.674587234 | 0.258308006 | 0.368127308 | 0.280984485 |
| Gm46272 | 225.0183357 | 283.6286589 | 166.4080125 | 0.587025316 | -0.768505373 | 0.000598502 | 0.026658028 | Down | 1.870663784 | 1.856302781 | 1.758741725 | 3.781163055 | 2.297948184 | 3.12632252 |
| Gm46404 | 60.67306117 | 38.66500393 | 82.68111842 | 2.13252102 | 1.092559962 | 0.001192145 | 0.045388082 | Up | 0.64124675 | 0.755155783 | 0.87946197 | 0.326712579 | 0.280661769 | 0.441092085 |
| Gm46558 | 21.37848843 | 7.521571038 | 35.23540583 | 4.689288771 | 2.229369124 | 0.000189395 | 0.011305835 | Up | 0.296020489 | 0.21848941 | 0.161749892 | 0.034520653 | 0.075763477 | 0.030760001 |
| Gm53610 | 25.03782916 | 8.253067387 | 41.82259094 | 5.067912676 | 2.341391666 | 2.25485E-05 | 0.002177824 | Up | 0.35223413 | 0.202345599 | 0.376912273 | 0.064352478 | 0.073560544 | 0.043006478 |
| Gm53794 | 180.029389 | 234.5940488 | 125.4647292 | 0.535037218 | -0.902288845 | 0.000561531 | 0.025443611 | Down | 1.247172133 | 2.145554472 | 1.86250553 | 2.46384817 | 3.365935783 | 3.80185701 |
| Gm54108 | 132.4274548 | 75.95552138 | 188.8993883 | 2.481146514 | 1.31100693 | 0.001078792 | 0.0419451 | Up | 1.098847678 | 0.283765885 | 0.868179159 | 0.271993753 | 0.252678332 | 0.37316204 |
| Gm7694 | 433.9527909 | 353.5651507 | 514.340431 | 1.453615726 | 0.539645933 | 0.001287845 | 0.047937621 | Up | 3.747287758 | 3.908345449 | 4.55169816 | 2.741334855 | 2.584965179 | 2.929713351 |
| Got1 | 3673.807956 | 4357.333999 | 2990.281912 | 0.686341376 | -0.543001764 | 2.23879E-05 | 0.002173763 | Down | 45.64666788 | 47.35649481 | 39.19985316 | 62.93584759 | 59.77548407 | 66.52560263 |
| Gpr176 | 54.53172863 | 82.19616423 | 26.86729303 | 0.328901356 | -1.604273138 | 1.47541E-05 | 0.00159266 | Down | 0.12507335 | 0.173552652 | 0.112422416 | 0.449700857 | 0.476434405 | 0.302976467 |
| Gprc5a | 143.7604414 | 201.6905426 | 85.83034015 | 0.424630569 | -1.23571986 | 1.51661E-05 | 0.001618103 | Down | 1.143913187 | 0.957648205 | 1.411266591 | 3.540547867 | 1.888673611 | 2.721052488 |
| Gramd1b | 7684.047708 | 10637.68222 | 4730.4132 | 0.444691732 | -1.169122512 | 2.46378E-14 | 3.22949E-11 | Down | 6.189363708 | 5.131839194 | 4.691144068 | 13.3355844 | 10.61577279 | 11.47370054 |
| Greb1l | 523.0055978 | 363.2858841 | 682.7253114 | 1.879106061 | 0.910046498 | 4.75526E-05 | 0.003777649 | Up | 0.963932998 | 1.204339385 | 1.693276685 | 0.796051811 | 0.584606814 | 0.642207221 |
| Grem1 | 12.87481287 | 24.23171753 | 1.517908207 | 0.065003839 | -3.943331261 | 1.90686E-05 | 0.001912839 | Down | 0.03639108 | 0.048554342 | 0 | 0.259294547 | 0.492474154 | 0.568731594 |
| Gsn | 2943.521372 | 3473.854816 | 2413.187927 | 0.694669646 | -0.525601035 | 0.000336951 | 0.0176399 | Down | 20.88059196 | 24.26668095 | 26.20408523 | 37.87910307 | 31.2269127 | 31.84849531 |
| Gucy1a1 | 604.2349942 | 398.6287244 | 809.8412641 | 2.032133132 | 1.022994921 | 1.13784E-06 | 0.000191563 | Up | 3.924157864 | 5.085177916 | 4.709871819 | 1.995657405 | 2.865424838 | 1.745723109 |
| Hcar1 | 91.5495954 | 50.03114905 | 133.0680418 | 2.652152981 | 1.407163995 | 0.000757459 | 0.031808062 | Up | 1.214821172 | 1.218691667 | 1.270611869 | 0.140176055 | 0.71418389 | 0.508543374 |
| Herpud1 | 12165.61359 | 16799.34201 | 7531.885164 | 0.448352392 | -1.157295001 | 1.12919E-16 | 2.07217E-13 | Down | 126.4602335 | 113.6697876 | 95.89230176 | 239.9536537 | 235.9769126 | 260.7524563 |
| Hivep2 | 639.2248037 | 824.8348254 | 453.6147821 | 0.550715891 | -0.860619856 | 2.66477E-06 | 0.000385049 | Down | 0.84431291 | 1.256714015 | 0.842176486 | 1.844075224 | 1.620429217 | 1.779942425 |
| Hk2 | 40.72841607 | 63.24988913 | 18.20694301 | 0.284997769 | -1.810977468 | 0.000777181 | 0.03250143 | Down | 0.074494146 | 0.039757152 | 0.159426673 | 0.479069635 | 0.169263976 | 0.295905579 |
| Hmcn2 | 437.9702854 | 287.7398989 | 588.2006719 | 2.04518892 | 1.032234116 | 2.43625E-08 | 7.45126E-06 | Up | 1.174292441 | 1.066389338 | 1.147298876 | 0.590764803 | 0.597103964 | 0.439596327 |
| Hmgcs1 | 15999.04465 | 18413.94202 | 13584.14728 | 0.73772676 | -0.438841526 | 0.00057352 | 0.025859131 | Down | 99.23849117 | 106.931862 | 87.12745236 | 123.1246871 | 127.4243565 | 139.8364843 |
| Hmx2 | 190.8471268 | 125.4785747 | 256.2156789 | 2.036322114 | 1.025965791 | 1.77329E-05 | 0.001827324 | Up | 2.624379092 | 2.254782699 | 2.87207152 | 1.024319837 | 1.116080192 | 1.602134673 |
| Hnf1b | 5719.835288 | 4191.465217 | 7248.20536 | 1.729313519 | 0.790199448 | 0.000178726 | 0.010824443 | Up | 47.66746242 | 70.75692975 | 80.23647295 | 38.14777648 | 45.15325726 | 29.24381785 |
| Hp | 50.27224634 | 77.42995385 | 23.11453884 | 0.295607132 | -1.758247017 | 8.93137E-05 | 0.006402323 | Down | 0.598667079 | 0.216948259 | 0.735516044 | 1.920143965 | 1.955955728 | 1.256151551 |
| Hpgd | 322.0915288 | 233.6451607 | 410.5378968 | 1.75493107 | 0.811414366 | 1.88211E-05 | 0.001908205 | Up | 6.592522443 | 7.20653951 | 7.908360595 | 3.404130016 | 4.278168277 | 4.456728742 |
| Hsp90ab1 | 57969.6912 | 67865.78267 | 48073.59973 | 0.70836475 | -0.497435673 | 4.16284E-05 | 0.003441094 | Down | 575.3468432 | 622.1060748 | 547.1357982 | 742.7533707 | 831.3721039 | 843.669699 |
| Hspa1a | 2897.711879 | 5310.994478 | 484.4292798 | 0.091141523 | -3.455747717 | 3.10198E-90 | 2.84622E-86 | Down | 5.71295728 | 4.512788819 | 5.485928049 | 65.72094527 | 56.38168056 | 47.3696326 |
| Hspa1b | 5180.765735 | 9677.989186 | 683.5422829 | 0.070633919 | -3.823495038 | 2.1258E-186 | 3.901E-182 | Down | 6.431469305 | 7.920295937 | 7.779236818 | 103.0757223 | 99.46206519 | 105.2090896 |
| Hspa8 | 114496.541 | 139644.4505 | 89348.63161 | 0.639832226 | -0.644234438 | 5.58191E-05 | 0.004296172 | Down | 1430.24635 | 1436.270355 | 999.3249696 | 1820.335721 | 1999.370556 | 2109.523469 |
| Hspb1 | 921.2670203 | 1275.711704 | 566.8223364 | 0.44457025 | -1.169516687 | 1.92808E-09 | 7.69179E-07 | Down | 21.59901246 | 21.1216046 | 14.41866839 | 37.32500715 | 49.56015805 | 39.09769905 |
| Hspb8 | 374.7487282 | 545.7796677 | 203.7177888 | 0.37352525 | -1.420722324 | 1.42253E-09 | 5.90741E-07 | Down | 2.331934766 | 4.221509459 | 3.672680786 | 7.236677078 | 10.33814055 | 9.239382974 |
| Hsph1 | 10198.65272 | 14017.88533 | 6379.420104 | 0.45512553 | -1.135663578 | 1.90505E-10 | 1.12773E-07 | Down | 30.4967858 | 36.68590044 | 23.48234576 | 54.12146727 | 67.41176821 | 73.73957522 |
| Hyou1 | 6574.429606 | 8049.806649 | 5099.052562 | 0.633438485 | -0.658723573 | 4.8922E-05 | 0.003820289 | Down | 36.92880268 | 33.52832546 | 27.83919701 | 47.95196836 | 43.97740953 | 60.76668598 |
| Icam1 | 1105.462706 | 1511.446125 | 699.479286 | 0.462445666 | -1.112644227 | 8.22192E-12 | 7.18478E-09 | Down | 8.343816477 | 7.010007159 | 9.275132879 | 18.19129922 | 18.09709276 | 16.07390909 |
| Ier3 | 929.8417086 | 1143.835802 | 715.8476149 | 0.625769283 | -0.676297253 | 3.16979E-05 | 0.002809251 | Down | 18.44069545 | 20.004656 | 21.25508587 | 35.48029576 | 25.64388057 | 32.76425536 |
| Ifitm1 | 249.7372413 | 326.9635574 | 172.5109251 | 0.526297173 | -0.926050448 | 5.46848E-05 | 0.004234266 | Down | 6.69625347 | 4.451844926 | 6.943794313 | 10.8213458 | 12.52545355 | 10.41792117 |
| Ifrd1 | 523.7334751 | 647.4616825 | 400.0052678 | 0.617785881 | -0.694821195 | 0.000110008 | 0.00726173 | Down | 7.636664025 | 6.17788793 | 6.234445169 | 12.39445766 | 9.42055626 | 10.12788324 |
| Ift70a1 | 143.6922918 | 98.23580531 | 189.1487783 | 1.920715955 | 0.941644182 | 0.001060624 | 0.041588687 | Up | 1.813107339 | 2.113250526 | 2.085089581 | 0.605389975 | 1.117667908 | 1.343509159 |
| Ift70b | 263.4170003 | 187.9228248 | 338.9111757 | 1.800652253 | 0.848519591 | 0.00021082 | 0.012310422 | Up | 4.06151734 | 4.028753461 | 3.699046462 | 1.525749485 | 2.127188584 | 2.774789827 |
| Igfbp3 | 7052.631866 | 4821.91794 | 9283.345793 | 1.92513106 | 0.944956665 | 1.35571E-07 | 3.27352E-05 | Up | 65.36182162 | 73.46659399 | 71.10753347 | 26.52998891 | 43.18497761 | 37.20521592 |
| Ikzf2 | 89.99937633 | 56.85386647 | 123.1448862 | 2.169300379 | 1.117229834 | 0.000153479 | 0.009579911 | Up | 0.283626475 | 0.457572795 | 0.306473314 | 0.146309633 | 0.158882545 | 0.168395592 |
| Il1b | 82.413714 | 121.5997831 | 43.22764488 | 0.355620699 | -1.491588797 | 2.84306E-06 | 0.000404442 | Down | 0.442282686 | 0.814913986 | 0.828222131 | 1.696887578 | 2.137619542 | 1.913180849 |
| Il22ra1 | 168.5917522 | 107.155057 | 230.0284475 | 2.141700466 | 1.098756722 | 4.30778E-05 | 0.003544939 | Up | 0.972750736 | 1.28877254 | 1.331260619 | 0.381629526 | 0.528615542 | 0.735119147 |
| Il4ra | 820.2521272 | 1034.802535 | 605.7017192 | 0.585687186 | -0.771797765 | 9.56611E-06 | 0.001132565 | Down | 3.348530169 | 3.837473796 | 3.375238933 | 7.291127086 | 5.10947396 | 5.324727752 |
| Inpp5a | 1322.253993 | 1560.77711 | 1083.730877 | 0.694543862 | -0.525862288 | 4.35978E-05 | 0.003555834 | Down | 9.75204262 | 10.374598 | 9.128509547 | 14.26959859 | 13.19106014 | 13.92521693 |
| Ippk | 502.7943913 | 598.6190396 | 406.9697429 | 0.68011061 | -0.556158697 | 0.000751894 | 0.031646817 | Down | 2.777219352 | 2.735581951 | 2.200591836 | 3.514288804 | 3.630997501 | 3.99926799 |
| Iqce | 697.172449 | 503.0507177 | 891.2941803 | 1.772802807 | 0.82603207 | 5.17023E-06 | 0.000682582 | Up | 3.293003563 | 4.618964033 | 4.394965941 | 2.642853672 | 2.085803484 | 2.089846532 |
| Irf2bpl | 1973.751969 | 2297.573732 | 1649.930206 | 0.718116453 | -0.477710277 | 0.000174243 | 0.010587884 | Down | 11.74188006 | 12.58606388 | 12.1609816 | 15.97982195 | 17.63747143 | 16.26503895 |
| Irx1 | 1069.921894 | 1298.873972 | 840.9698161 | 0.647419944 | -0.627226285 | 9.52301E-06 | 0.001132565 | Down | 9.059138354 | 8.023554993 | 7.74470228 | 13.18050805 | 11.71324763 | 12.8235128 |
| Jdp2 | 202.279605 | 263.0281571 | 141.5310529 | 0.537053228 | -0.896863012 | 0.000138524 | 0.008796006 | Down | 1.695788629 | 1.581208629 | 1.764540673 | 2.281964093 | 3.177077018 | 3.758305221 |
| Junb | 717.0919674 | 1004.035612 | 430.1483226 | 0.428273704 | -1.223394998 | 4.45091E-06 | 0.000596195 | Down | 6.596605055 | 5.867625055 | 8.741087235 | 24.60712838 | 12.10422763 | 12.0951669 |
| Kdr | 2620.303891 | 2015.953154 | 3224.654628 | 1.599317554 | 0.677456423 | 0.000213986 | 0.012411154 | Up | 11.55535866 | 13.64586381 | 12.23873294 | 5.584757275 | 8.249922959 | 9.138808972 |
| Klf11 | 419.2325258 | 297.660086 | 540.8049655 | 1.816578969 | 0.861224083 | 0.000732203 | 0.031031536 | Up | 3.594875703 | 5.182795934 | 3.60631783 | 1.395650419 | 2.867878445 | 2.399434604 |
| Klf5 | 26.39790406 | 40.20656251 | 12.58924562 | 0.309602428 | -1.691511311 | 0.000870456 | 0.035184451 | Down | 0.207100623 | 0.138160705 | 0.313948147 | 0.737819032 | 0.536310856 | 0.809158926 |
| Klf6 | 1479.370512 | 1920.073884 | 1038.667141 | 0.541054912 | -0.886153073 | 4.46602E-08 | 1.30089E-05 | Down | 6.95174469 | 7.7750043 | 7.673386877 | 16.47344074 | 12.15791649 | 12.06082367 |
| Krt18 | 522.0161779 | 728.1486382 | 315.8837175 | 0.433984582 | -1.204284305 | 8.25188E-06 | 0.001009534 | Down | 6.539645952 | 6.859086866 | 7.111796145 | 23.86447281 | 12.74808434 | 9.862491361 |
| Krt19 | 104.4500176 | 178.3555529 | 30.54448242 | 0.172284466 | -2.537135465 | 2.6718E-07 | 6.12877E-05 | Down | 0.73713781 | 0.917949088 | 0.315513193 | 7.087680087 | 1.414523549 | 2.797769844 |
| Krt20 | 159.9715702 | 318.046035 | 1.897105442 | 0.00598251 | -7.38503347 | 4.00528E-05 | 0.003397106 | Down | 0.015309286 | 0.040852447 | 0.032763764 | 14.23101526 | 0.230197678 | 0.194397524 |
| Krt7 | 2746.656548 | 3426.565337 | 2066.747759 | 0.603209707 | -0.72926845 | 0.000117217 | 0.00763917 | Down | 44.09441255 | 37.9504632 | 36.35864675 | 84.592752 | 54.1352174 | 54.42078453 |
| Lama1 | 739.6081403 | 607.141783 | 872.0744976 | 1.436141302 | 0.522197703 | 0.000316198 | 0.016917036 | Up | 2.495369387 | 2.793692947 | 2.622460393 | 1.754043039 | 1.669612335 | 1.990012876 |
| Lamc2 | 600.4393626 | 763.2719562 | 437.6067689 | 0.574036495 | -0.800785634 | 0.000538357 | 0.024698494 | Down | 2.273690476 | 3.173811332 | 2.083698698 | 5.817638856 | 3.249579726 | 3.820561675 |
| Large2 | 393.0083202 | 281.6781712 | 504.3384691 | 1.787550166 | 0.83798373 | 0.000377325 | 0.019075189 | Up | 5.265270071 | 4.477343512 | 6.41167881 | 2.45875547 | 2.406801262 | 4.042365988 |
| Lcn2 | 198.1814786 | 334.667175 | 61.69578214 | 0.184317544 | -2.439734697 | 0.001361395 | 0.049766851 | Down | 1.43343737 | 2.145783136 | 2.992910272 | 24.02965272 | 5.677597696 | 5.429807374 |
| Lcp1 | 1315.265224 | 1567.659418 | 1062.87103 | 0.678124324 | -0.560378301 | 7.37625E-05 | 0.005423887 | Down | 6.594951056 | 6.619604788 | 6.390150336 | 10.71131258 | 8.952125707 | 8.752509084 |
| Litaf | 1275.569434 | 1585.135515 | 966.0033532 | 0.609453339 | -0.714412325 | 4.34309E-05 | 0.003555834 | Down | 10.93860836 | 12.2060788 | 13.12856595 | 24.21109795 | 16.36137209 | 17.97596186 |
| Lonrf3 | 589.0937692 | 759.5136736 | 418.6738648 | 0.551884435 | -0.857561898 | 2.36617E-05 | 0.002261537 | Down | 1.849639767 | 1.953283881 | 1.22964852 | 3.468410022 | 2.512947781 | 2.982932666 |
| Lrat | 120.1713638 | 65.16893251 | 175.1737952 | 2.684151237 | 1.424465962 | 3.88423E-07 | 8.36375E-05 | Up | 0.858602245 | 0.897618397 | 1.217055296 | 0.311692651 | 0.452700583 | 0.321303712 |
| Lrrc8a | 1624.186011 | 1862.413488 | 1385.958535 | 0.744261024 | -0.426119409 | 0.000730177 | 0.031017302 | Down | 9.183700396 | 10.50722876 | 9.947152577 | 13.26393211 | 12.91655371 | 12.92828252 |
| Lrrcc1 | 362.4612168 | 280.3219285 | 444.6005051 | 1.585774017 | 0.665187192 | 0.001180441 | 0.045129719 | Up | 1.587588175 | 2.068182933 | 1.997559563 | 0.972920985 | 1.416013238 | 1.102997691 |
| Lrrfip1 | 1027.458326 | 1191.041164 | 863.8754874 | 0.725570125 | -0.46281304 | 0.000855426 | 0.03480691 | Down | 2.714310057 | 2.996060619 | 2.656494605 | 4.071592358 | 3.421027309 | 3.841997521 |
| Lrrn1 | 152.23887 | 84.66535706 | 219.812383 | 2.589364893 | 1.372598284 | 1.67788E-06 | 0.000265437 | Up | 1.715031356 | 1.963382793 | 1.648272024 | 0.400369728 | 0.684496923 | 0.930662023 |
| Lyz2 | 1359.843497 | 1762.47421 | 957.212783 | 0.542879664 | -0.881295653 | 4.70527E-05 | 0.003754191 | Down | 26.12641953 | 21.6832573 | 34.29699618 | 62.59858344 | 37.47481725 | 49.16501687 |
| Maff | 219.4844665 | 344.9931064 | 93.9758267 | 0.273222907 | -1.87184965 | 6.14596E-10 | 3.04823E-07 | Down | 0.809281535 | 1.117007319 | 0.746535538 | 4.649757561 | 3.002555103 | 1.953490357 |
| Manf | 4577.383096 | 5785.363699 | 3369.402494 | 0.582342386 | -0.780060465 | 0.000103237 | 0.007016692 | Down | 156.1901361 | 88.93219917 | 106.728413 | 213.810069 | 174.2038434 | 208.0358784 |
| Map2k6 | 679.8927492 | 528.5867349 | 831.1987635 | 1.571059672 | 0.651737979 | 0.001266978 | 0.04735297 | Up | 1.842523168 | 1.680677267 | 2.134319559 | 1.061350258 | 0.945916786 | 1.541994695 |
| Map3k6 | 248.1271596 | 409.2276249 | 87.0266943 | 0.21317545 | -2.229886791 | 7.13069E-10 | 3.44356E-07 | Down | 0.432390761 | 0.432683963 | 0.240240194 | 2.866677246 | 1.333668151 | 0.897486186 |
| Map3k8 | 95.50310336 | 129.6883476 | 61.31785909 | 0.47342331 | -1.078797352 | 0.000381917 | 0.01915655 | Down | 0.824129229 | 0.664637494 | 0.56439627 | 1.854982694 | 1.079480658 | 1.341641549 |
| Mbd1 | 1655.758374 | 2011.751749 | 1299.764999 | 0.646386816 | -0.629530323 | 4.5441E-05 | 0.00368977 | Down | 6.338493328 | 7.491460434 | 5.452050352 | 10.46220362 | 8.617941225 | 10.21912373 |
| Mcam | 679.3314896 | 803.8640325 | 554.7989466 | 0.690192889 | -0.534928486 | 0.000435288 | 0.021017959 | Down | 5.195616443 | 4.823064597 | 4.720088958 | 7.195664179 | 7.384179876 | 6.394744435 |
| Mcemp1 | 12.16633487 | 21.74813695 | 2.584532801 | 0.118641558 | -3.075318645 | 0.00021739 | 0.012487324 | Down | 0.051820138 | 0.06914037 | 0.083176123 | 0.852069296 | 0.285703785 | 0.556780077 |
| Mchr1 | 45.66167927 | 70.61939381 | 20.70396474 | 0.296149651 | -1.755601709 | 0.000503158 | 0.023494767 | Down | 0.24522833 | 0.460493605 | 0.160361336 | 1.090199763 | 1.338378486 | 0.439141527 |
| Medag | 77.65395912 | 148.0057412 | 7.302177027 | 0.048678141 | -4.360582112 | 1.00588E-14 | 1.41992E-11 | Down | 0.065257089 | 0.041461168 | 0.099755879 | 2.687636269 | 0.6915381 | 0.764894214 |
| Mfsd2a | 426.7545688 | 569.3379647 | 284.1711729 | 0.499596365 | -1.001165115 | 2.67517E-05 | 0.002467822 | Down | 2.021543488 | 3.2265798 | 2.951623848 | 7.145020736 | 4.725247885 | 4.244431995 |
| Mgp | 4197.654646 | 5264.595981 | 3130.71331 | 0.594687707 | -0.749795842 | 0.00055273 | 0.02516912 | Down | 161.1961152 | 140.8459934 | 158.7319916 | 343.3885755 | 248.7535761 | 169.3961752 |
| Micall2 | 130.0268323 | 184.3730366 | 75.68062799 | 0.40898034 | -1.289896601 | 3.41035E-06 | 0.00046704 | Down | 0.635609163 | 0.40290667 | 0.641052492 | 1.36946865 | 1.537959599 | 1.120373897 |
| Mid1ip1 | 1386.462068 | 1697.54292 | 1075.381215 | 0.633582866 | -0.658394774 | 9.25389E-05 | 0.006530752 | Down | 15.9178806 | 15.60175898 | 15.94820352 | 29.6108909 | 24.01473459 | 19.99043042 |
| Mknk2 | 4562.477025 | 5445.135018 | 3679.819033 | 0.675834713 | -0.565257641 | 1.21129E-06 | 0.000199325 | Down | 30.83730547 | 31.54977794 | 29.44232361 | 46.78481636 | 42.56182402 | 44.17421515 |
| Mmp11 | 155.9817471 | 105.3630851 | 206.6004091 | 1.959107434 | 0.970196515 | 1.16546E-05 | 0.001333188 | Up | 2.80237556 | 2.828912889 | 2.580289584 | 1.28592451 | 1.241269882 | 1.591440194 |
| Mmp19 | 134.0942386 | 254.6510234 | 13.53745393 | 0.053077134 | -4.235765717 | 0.000253197 | 0.014080076 | Down | 0.172583852 | 0.061404758 | 0.120038997 | 5.562020394 | 0.449809105 | 0.598440455 |
| Mmp3 | 28.43857596 | 46.6347628 | 10.24238912 | 0.21791454 | -2.198165633 | 0.000109689 | 0.00726173 | Down | 0.099353103 | 0.132560632 | 0.283503883 | 1.179854976 | 0.663964579 | 0.469051593 |
| Mmp8 | 9.093738905 | 16.69308754 | 1.494390267 | 0.093560593 | -3.417955184 | 0.001004129 | 0.039798625 | Down | 0 | 0.043256185 | 0.013009338 | 0.333174263 | 0.121871199 | 0.154376835 |
| Mpv17l | 14571.48422 | 16968.87154 | 12174.09691 | 0.717404417 | -0.479141467 | 0.000152853 | 0.009573408 | Down | 67.12973566 | 59.97519377 | 69.25393691 | 92.76595966 | 84.68835474 | 91.91642971 |
| Mpzl2 | 182.7724461 | 137.9136605 | 227.6312316 | 1.648658633 | 0.721292709 | 0.000779283 | 0.03250143 | Up | 1.890517621 | 2.014889636 | 2.004745652 | 1.110861216 | 1.007313138 | 1.405746117 |
| Mrnip | 465.2814964 | 343.805172 | 586.7578208 | 1.70484885 | 0.769643837 | 0.000540524 | 0.024736044 | Up | 8.761716859 | 5.699885419 | 9.783211991 | 4.325003196 | 5.127975337 | 4.544874403 |
| Ms4a6d | 26.8492681 | 43.45614708 | 10.24238912 | 0.23389221 | -2.09608428 | 0.000283627 | 0.01539894 | Down | 0.132250509 | 0.176453583 | 0.377376565 | 1.353066729 | 0.994290637 | 0.51671346 |
| Msmo1 | 1414.180764 | 1810.497078 | 1017.86445 | 0.562268249 | -0.830669513 | 0.000186643 | 0.011229781 | Down | 15.47490014 | 12.05558973 | 12.17258262 | 32.0451013 | 20.41798032 | 17.01736297 |
| Muc1 | 355.0378064 | 443.9818126 | 266.0938002 | 0.599682063 | -0.737730274 | 0.000512557 | 0.02387295 | Down | 3.722825284 | 3.737176224 | 3.329195699 | 7.301926161 | 4.278331099 | 6.142825762 |
| Myadm | 1120.871352 | 1337.205615 | 904.5370893 | 0.676588005 | -0.563650494 | 0.000346652 | 0.017919457 | Down | 7.398287814 | 8.303336359 | 7.734842443 | 11.29429055 | 12.9082392 | 9.765218454 |
| Myc | 298.7455605 | 408.5097235 | 188.9813975 | 0.463053889 | -1.110747994 | 3.66193E-05 | 0.003154932 | Down | 2.734867749 | 2.377354684 | 2.048534177 | 7.48119683 | 4.06243088 | 3.6791603 |
| Myct1 | 164.4207696 | 109.1531689 | 219.6883704 | 2.015893246 | 1.011419241 | 3.43666E-05 | 0.003003146 | Up | 2.083386027 | 2.50271375 | 2.60857134 | 1.365560966 | 1.259530286 | 0.881129489 |
| Myof | 1018.057826 | 1436.198631 | 599.91702 | 0.417882025 | -1.258832392 | 4.12282E-07 | 8.59749E-05 | Down | 2.322753021 | 2.785504275 | 2.485489185 | 9.061652277 | 4.436435396 | 4.367432487 |
| Myorg | 1205.621215 | 930.5537893 | 1480.688641 | 1.590945852 | 0.669884734 | 1.08182E-05 | 0.001255491 | Up | 8.473130863 | 10.81930707 | 10.79886917 | 5.746674816 | 6.250106059 | 6.571592257 |
| N4bp2l1 | 171.9505563 | 119.791244 | 224.1098686 | 1.870075174 | 0.903096265 | 0.000345529 | 0.017911895 | Up | 3.207560538 | 3.075779128 | 4.38663133 | 1.972440579 | 2.148801525 | 1.482467454 |
| Nap1l5 | 152.0486788 | 94.4647826 | 209.6325751 | 2.221391334 | 1.151463569 | 2.23719E-06 | 0.000331086 | Up | 2.787001412 | 3.417398463 | 3.858408883 | 1.760553317 | 1.373213014 | 1.32268006 |
| Nat8f4 | 318.5423853 | 238.9986107 | 398.0861598 | 1.664748488 | 0.73530423 | 0.000108637 | 0.00726173 | Up | 2.505206199 | 2.243979318 | 2.348766372 | 1.48216576 | 1.13243101 | 1.583696331 |
| Nav2 | 1474.016279 | 1032.400914 | 1915.631645 | 1.854767551 | 0.891238392 | 4.90223E-09 | 1.73002E-06 | Up | 0.457737389 | 0.480612708 | 0.581802951 | 0.251597095 | 0.262983701 | 0.291368465 |
| Nedd4l | 3332.228153 | 3832.532204 | 2831.924101 | 0.739021697 | -0.436311373 | 0.001021244 | 0.040389753 | Down | 4.842857773 | 4.838765529 | 4.292204136 | 6.796817141 | 6.059776423 | 5.716575444 |
| Neil2 | 116.0137233 | 68.95764311 | 163.0698035 | 2.365829084 | 1.242345852 | 5.37007E-06 | 0.000703901 | Up | 1.32297533 | 1.922366079 | 1.783089893 | 0.619945575 | 0.840259203 | 0.62146036 |
| Nfil3 | 646.302018 | 905.2267628 | 387.3772731 | 0.428368971 | -1.223074111 | 3.91958E-07 | 8.36375E-05 | Down | 3.020337292 | 3.144231783 | 1.74467959 | 5.647503073 | 7.622790918 | 4.79729894 |
| Nfkb2 | 734.5949866 | 952.2175215 | 516.9724516 | 0.543215397 | -0.880403723 | 5.59525E-05 | 0.004296172 | Down | 1.184982112 | 1.544661131 | 1.434623729 | 3.451365749 | 2.06884018 | 2.013301978 |
| Nfkbia | 884.1212779 | 1071.136946 | 697.1056096 | 0.650791933 | -0.619731726 | 0.000243926 | 0.013647234 | Down | 13.14531527 | 12.73423452 | 14.22798079 | 24.32678525 | 18.61101334 | 17.6733838 |
| Nfkbie | 162.2407015 | 214.4072624 | 110.0741406 | 0.514129864 | -0.95979528 | 0.000148237 | 0.009348082 | Down | 0.978588669 | 1.642967657 | 1.492189196 | 2.668384196 | 2.918380323 | 2.258210553 |
| Nfkbiz | 359.9191216 | 493.1225282 | 226.7157151 | 0.459693648 | -1.121255363 | 0.000612263 | 0.027073839 | Down | 1.96926512 | 1.410857925 | 1.902251321 | 6.434057276 | 2.181444364 | 2.731846938 |
| Nhs | 562.3665648 | 410.6849279 | 714.0482017 | 1.738204878 | 0.797598139 | 5.90247E-05 | 0.004513174 | Up | 1.324931043 | 1.911493984 | 1.795662191 | 0.764140844 | 1.075942523 | 0.996543098 |
| Niban1 | 557.2065843 | 703.1107948 | 411.3023739 | 0.585566606 | -0.772094814 | 3.96901E-05 | 0.003387689 | Down | 2.252533034 | 2.632649435 | 1.698455551 | 3.399456651 | 3.486787884 | 4.154810067 |
| Niban2 | 1127.716209 | 1328.472936 | 926.9594825 | 0.697866817 | -0.51897636 | 7.82458E-05 | 0.005697974 | Down | 7.58281013 | 7.80074867 | 7.440062517 | 11.445854 | 10.18356796 | 10.5144648 |
| Nlrc4 | 222.7218719 | 295.993055 | 149.4506888 | 0.504614746 | -0.986745728 | 1.85177E-05 | 0.001887876 | Down | 1.408424676 | 0.989376535 | 0.888803382 | 1.900182629 | 2.237238216 | 2.264625949 |
| Nlrx1 | 476.5754035 | 378.0036263 | 575.1471806 | 1.522033725 | 0.606000326 | 0.000337399 | 0.0176399 | Up | 3.948857302 | 4.492236297 | 4.698587132 | 3.022690849 | 2.951943976 | 2.503106706 |
| Noct | 429.4596558 | 626.8128475 | 232.1064641 | 0.370308049 | -1.433202188 | 9.38523E-09 | 2.96945E-06 | Down | 2.328684124 | 2.096917224 | 2.348273272 | 8.761035639 | 4.745543877 | 4.502376592 |
| Npr3 | 815.2406142 | 608.4108329 | 1022.070396 | 1.67951341 | 0.748043315 | 0.000402602 | 0.019860632 | Up | 3.193091991 | 4.783364793 | 3.909574981 | 1.668762565 | 2.525586194 | 2.739740252 |
| Nr4a3 | 70.06483206 | 132.8260923 | 7.303571822 | 0.055391517 | -4.17419113 | 3.16906E-16 | 5.28686E-13 | Down | 0.027374433 | 0.034784756 | 0.025107715 | 0.895939058 | 0.286170388 | 0.378159246 |
| Nrep | 396.2663394 | 231.4652853 | 561.0673934 | 2.422640695 | 1.276580453 | 8.16024E-10 | 3.66156E-07 | Up | 6.672261652 | 4.765478411 | 7.245245324 | 2.750276425 | 2.449149945 | 2.397155612 |
| Nt5e | 6160.298661 | 7766.738661 | 4553.85866 | 0.586367705 | -0.770122447 | 2.73494E-05 | 0.002509447 | Down | 41.0850612 | 45.1401124 | 29.64776498 | 53.97677308 | 61.91940313 | 78.08067201 |
| Nudt19 | 29477.30349 | 36095.61785 | 22858.98914 | 0.633279763 | -0.659085118 | 2.04549E-05 | 0.002025897 | Down | 416.4597415 | 324.0775697 | 339.3089004 | 560.0852602 | 483.8106844 | 636.2009947 |
| Nupr1 | 391.711093 | 528.9479888 | 254.4741972 | 0.481511096 | -1.054359051 | 1.63622E-05 | 0.001706042 | Down | 13.95844964 | 12.50067461 | 10.50136197 | 35.66772053 | 20.1528629 | 19.73003489 |
| Oas2 | 108.1675413 | 147.8334798 | 68.50160268 | 0.46274837 | -1.111700186 | 0.000338423 | 0.017643161 | Down | 0.438888737 | 0.500997757 | 0.587047568 | 1.22681677 | 0.667266487 | 1.357529323 |
| Oas3 | 21.49139443 | 33.99626997 | 8.9865189 | 0.265157113 | -1.915080647 | 0.001242982 | 0.046646158 | Down | 0.084912519 | 0.048554342 | 0.032450585 | 0.305834594 | 0.164158051 | 0.148107186 |
| Ogn | 519.6442679 | 367.6052068 | 671.683329 | 1.826534692 | 0.869109156 | 8.03707E-05 | 0.005829575 | Up | 8.245108815 | 7.231811144 | 8.011768413 | 3.348410319 | 5.686612455 | 3.566904651 |
| Olfml1 | 242.9537444 | 180.6210131 | 305.2864757 | 1.691291471 | 0.75812531 | 7.3883E-05 | 0.005423887 | Up | 4.331758278 | 4.823064597 | 4.943184999 | 3.038325918 | 2.626630722 | 2.529803121 |
| Olr1 | 22.96354063 | 44.62305588 | 1.304025371 | 0.029030471 | -5.106288188 | 8.62367E-07 | 0.000153644 | Down | 0.015871469 | 0.007058769 | 0.008491726 | 0.817711419 | 0.175010674 | 0.069762504 |
| Or5m3b | 229.6274924 | 321.8402479 | 137.4147369 | 0.427796788 | -1.225002445 | 6.57486E-07 | 0.000123118 | Down | 0.524217499 | 0.477130969 | 0.277211241 | 0.922098333 | 1.075425837 | 0.937747799 |
| Osgin1 | 2861.516697 | 3592.573229 | 2130.460164 | 0.593184159 | -0.753448023 | 0.000482606 | 0.022708485 | Down | 23.76947454 | 36.11403825 | 24.93335284 | 54.42326393 | 52.80885459 | 32.56273082 |
| Osmr | 754.0033203 | 1078.420007 | 429.5866339 | 0.398524335 | -1.327260272 | 4.61679E-09 | 1.69445E-06 | Down | 2.323188423 | 2.515898798 | 2.356661919 | 8.458736168 | 4.707224569 | 4.592088665 |
| P4ha1 | 3543.622955 | 4434.947349 | 2652.298561 | 0.598057543 | -0.741643794 | 7.74165E-07 | 0.00014066 | Down | 19.36214632 | 21.34270564 | 17.9649912 | 27.14454456 | 32.13313388 | 37.06002951 |
| P4ha2 | 1087.309368 | 1333.376209 | 841.2425262 | 0.6306229 | -0.665150535 | 3.30971E-06 | 0.000463637 | Down | 11.73823368 | 10.0790738 | 10.76431449 | 16.61737395 | 15.96100062 | 18.24800026 |
| Padi4 | 4.526714241 | 9.053428482 | 0 | 0.019715816 | -5.664502781 | 0.000455911 | 0.021752357 | Down | 0 | 0 | 0 | 0.173361675 | 0.056619328 | 0.077237897 |
| Palld | 2763.993228 | 3349.361261 | 2178.625196 | 0.650417357 | -0.620562336 | 4.1097E-06 | 0.000554538 | Down | 8.692381955 | 8.544432603 | 7.942482715 | 11.26131549 | 13.12537788 | 13.6410186 |
| Pcdh18 | 208.5126516 | 139.4834653 | 277.541838 | 1.991408356 | 0.993789089 | 2.0157E-06 | 0.0003107 | Up | 1.757567176 | 1.543362509 | 1.44808309 | 0.898680957 | 0.692352784 | 0.756901062 |
| Pcolce | 2615.859114 | 3092.69593 | 2139.022298 | 0.691707194 | -0.531766633 | 0.000380905 | 0.01915655 | Down | 40.40278817 | 43.09105797 | 42.88097541 | 71.35105002 | 53.6322997 | 54.62532536 |
| Pcsk9 | 129.7333123 | 198.5357632 | 60.9308613 | 0.306186561 | -1.707517135 | 9.43346E-06 | 0.001132565 | Down | 0.798210145 | 0.279468578 | 0.490672811 | 2.559806699 | 1.268324535 | 1.227562288 |
| Pde3b | 449.555813 | 562.5635538 | 336.5480723 | 0.59903286 | -0.739292949 | 0.000651126 | 0.028449546 | Down | 1.596323923 | 2.609034376 | 1.605554556 | 2.695914804 | 3.245646484 | 3.564768242 |
| Pde4d | 676.0318924 | 556.4024713 | 795.6613135 | 1.429256608 | 0.515264961 | 0.000555911 | 0.025251312 | Up | 0.764807563 | 0.814745144 | 0.848384726 | 0.526726466 | 0.526832859 | 0.616015724 |
| Pde9a | 1011.415637 | 721.0879599 | 1301.743313 | 1.804854276 | 0.851882359 | 9.29276E-09 | 2.96945E-06 | Up | 10.11383926 | 8.540916422 | 9.912206654 | 5.341831192 | 5.246259063 | 4.978175725 |
| Peg10 | 28.06003194 | 44.0502794 | 12.06978449 | 0.275625665 | -1.859217863 | 0.000127252 | 0.00822256 | Down | 0.058150947 | 0.06366127 | 0.043078919 | 0.220653613 | 0.224201329 | 0.144184911 |
| Peg3 | 641.3831968 | 486.233509 | 796.5328846 | 1.638893288 | 0.71272192 | 0.000322099 | 0.017182678 | Up | 2.114222836 | 2.638361673 | 1.573082971 | 1.113238454 | 1.304424106 | 1.36490072 |
| Per1 | 885.7564579 | 1164.838088 | 606.6748275 | 0.521043595 | -0.94052401 | 0.00037398 | 0.018958289 | Down | 1.659317343 | 2.670322654 | 2.121752746 | 5.395759708 | 2.266622343 | 4.522531095 |
| Per2 | 918.5657165 | 1293.000226 | 544.1312068 | 0.421159329 | -1.247561972 | 1.61848E-11 | 1.29134E-08 | Down | 2.783953344 | 3.06714049 | 2.262996266 | 7.607925701 | 5.013508889 | 6.325910657 |
| Pfkp | 1618.019187 | 2033.78618 | 1202.252195 | 0.591414006 | -0.757759685 | 3.12244E-07 | 6.90359E-05 | Down | 7.450624238 | 9.466678858 | 7.551890105 | 14.74932903 | 12.08493058 | 13.80000206 |
| Phlda1 | 256.2931901 | 323.1757017 | 189.4106786 | 0.586839845 | -0.768961264 | 0.000869578 | 0.035184451 | Down | 2.855507205 | 3.124002414 | 2.843149824 | 6.561646179 | 4.331943911 | 3.892912066 |
| Phyhipl | 822.016588 | 959.8624523 | 684.1707238 | 0.712691666 | -0.488650042 | 0.000388642 | 0.019327852 | Down | 6.005060755 | 6.157179597 | 6.22763389 | 8.399920154 | 8.751051184 | 8.191119153 |
| Pibf1 | 136.0503059 | 99.92725077 | 172.173361 | 1.723645171 | 0.785462813 | 0.000526205 | 0.024330235 | Up | 1.258301106 | 1.434246344 | 1.265833554 | 0.768132505 | 0.679775256 | 0.809567798 |
| Pik3cd | 150.3914661 | 194.9882565 | 105.7946758 | 0.541534048 | -0.884876049 | 0.001202683 | 0.045509553 | Down | 0.424740212 | 0.437232532 | 0.674087304 | 1.166603629 | 0.7797865 | 0.843731726 |
| Pim1 | 437.5220796 | 544.0673424 | 330.9768167 | 0.608172884 | -0.7174466 | 0.000356436 | 0.018270832 | Down | 4.547517764 | 3.165635769 | 3.349868563 | 6.923520707 | 5.42844845 | 5.557714786 |
| Pitpnc1 | 1930.975502 | 1570.698648 | 2291.252356 | 1.45864734 | 0.544631122 | 0.000729662 | 0.031017302 | Up | 10.42096627 | 12.09548798 | 9.877376645 | 5.904597174 | 7.790622558 | 8.088824619 |
| Plekha7 | 2529.875017 | 2123.066946 | 2936.683088 | 1.383067999 | 0.467872088 | 0.000228676 | 0.01299203 | Up | 7.769694262 | 7.935800178 | 7.630744119 | 5.0485143 | 5.714068893 | 5.809650765 |
| Plet1 | 808.1050118 | 1062.640635 | 553.5693882 | 0.521381415 | -0.939588937 | 4.7481E-09 | 1.70848E-06 | Down | 8.352235734 | 10.50440477 | 8.453370491 | 19.17899053 | 15.06086392 | 17.23166613 |
| Popdc3 | 42.78134694 | 72.02635921 | 13.53633467 | 0.185802174 | -2.428160716 | 0.000139561 | 0.008831304 | Down | 0.212367678 | 0.067464027 | 0.340869797 | 1.380141336 | 0.258502079 | 1.659475477 |
| Postn | 71.83051041 | 109.5419273 | 34.11909353 | 0.311519591 | -1.682605198 | 0.000622859 | 0.027476177 | Down | 0.350234758 | 0.249224712 | 0.309187578 | 1.910017813 | 0.482743771 | 0.487490932 |
| Ppard | 1642.898549 | 2137.614406 | 1148.182693 | 0.536970971 | -0.897083998 | 1.08741E-07 | 2.73356E-05 | Down | 11.58049204 | 9.146356372 | 10.98367786 | 22.15550444 | 15.92095527 | 20.12308807 |
| Ppfibp2 | 549.5051463 | 441.7459765 | 657.264316 | 1.487355043 | 0.572749071 | 0.000230696 | 0.013030289 | Up | 1.843204062 | 2.141462505 | 2.162684688 | 1.294329245 | 1.309674228 | 1.455886936 |
| Ppl | 237.1790613 | 332.2726567 | 142.0854659 | 0.428155269 | -1.223794014 | 0.000361703 | 0.0184636 | Down | 0.66515032 | 0.786043505 | 0.610073075 | 2.598827189 | 0.733444447 | 1.415415804 |
| Prkag3 | 225.7153872 | 326.714577 | 124.7161974 | 0.381535252 | -1.390111734 | 3.0952E-05 | 0.002770737 | Down | 1.165093983 | 1.062467612 | 1.487685693 | 5.26963552 | 1.796055792 | 2.543829899 |
| Prkar1b | 139.1459918 | 181.3364339 | 96.95554965 | 0.534365092 | -0.904102329 | 6.82418E-05 | 0.005111449 | Down | 0.920670081 | 0.867100596 | 0.878929608 | 1.573207725 | 1.773432509 | 1.551704283 |
| Prr15 | 424.9106328 | 538.7936653 | 311.0276003 | 0.577562951 | -0.791949895 | 0.000420602 | 0.020554824 | Down | 3.599501967 | 4.626069302 | 4.759692234 | 9.90183511 | 5.940586155 | 6.269774804 |
| Psca | 94.4889624 | 157.3224337 | 31.65549107 | 0.201492843 | -2.3111995 | 4.05309E-07 | 8.54923E-05 | Down | 1.254216856 | 1.177594043 | 0.932006594 | 8.478288573 | 1.676355429 | 6.363619027 |
| Ptger4 | 174.7700583 | 228.9230195 | 120.617097 | 0.526311246 | -0.926011873 | 0.000134655 | 0.00860997 | Down | 0.923269143 | 1.036516738 | 1.333259664 | 2.476148716 | 1.71624466 | 1.961243636 |
| Rbm14 | 875.1998065 | 1080.298939 | 670.100674 | 0.62058245 | -0.688305196 | 4.64033E-05 | 0.003718543 | Down | 7.229694468 | 6.732194334 | 5.278358153 | 11.26850885 | 8.889234487 | 10.33516628 |
| Rbm34 | 578.6050873 | 456.7221054 | 700.4880692 | 1.533701715 | 0.617017925 | 3.5456E-05 | 0.003083662 | Up | 5.724305045 | 6.432879368 | 6.566235757 | 4.083979989 | 3.928003323 | 3.981575665 |
| Relb | 291.5529985 | 404.5774274 | 178.5285696 | 0.441591122 | -1.179216927 | 1.11325E-06 | 0.000191563 | Down | 0.476145884 | 0.697754406 | 0.692780863 | 1.569591375 | 1.57613225 | 0.997089014 |
| Retnlg | 26.14843974 | 51.0872014 | 1.209678083 | 0.024910911 | -5.327078384 | 4.0165E-10 | 2.16785E-07 | Down | 0 | 0.130889089 | 0.052486687 | 2.473336674 | 2.261793153 | 2.7788221 |
| Rgs12 | 346.5336458 | 245.8767132 | 447.1905784 | 1.817286846 | 0.861786157 | 1.42676E-06 | 0.00022967 | Up | 1.117800741 | 1.184924122 | 1.393533003 | 0.666193335 | 0.628252019 | 0.704922295 |
| Rgs16 | 34.75231413 | 62.58039143 | 6.924236823 | 0.111993076 | -3.15851855 | 7.15977E-09 | 2.34623E-06 | Down | 0.140611824 | 0.102332489 | 0.02735697 | 1.120996439 | 0.640698782 | 0.636783449 |
| Rhebl1 | 212.756123 | 153.2656861 | 272.2465599 | 1.780309588 | 0.832128141 | 0.000476319 | 0.022470268 | Up | 5.808655948 | 7.792132471 | 6.03875335 | 4.193152415 | 3.976532752 | 2.652349922 |
| Rhob | 2649.275562 | 3190.387153 | 2108.163971 | 0.660867894 | -0.597566185 | 0.000421155 | 0.020554824 | Down | 28.3243825 | 27.10278956 | 26.15173207 | 49.72548 | 38.99459165 | 32.56477147 |
| Rhou | 95.70322165 | 136.077265 | 55.32917831 | 0.409442381 | -1.288267652 | 0.000828284 | 0.034080356 | Down | 0.400068395 | 0.78907531 | 0.288500752 | 1.71606607 | 0.915420105 | 0.917471538 |
| Rin1 | 60.04210657 | 88.38239216 | 31.70182098 | 0.358789051 | -1.478792229 | 0.000460942 | 0.021913871 | Down | 0.148785121 | 0.190574095 | 0.235629717 | 0.861149419 | 0.334089062 | 0.383668251 |
| Rnf39 | 20.85231956 | 36.86592678 | 4.838712334 | 0.13415512 | -2.89802598 | 0.000345307 | 0.017911895 | Down | 0 | 0.220139878 | 0.088276365 | 0.926924899 | 1.095736703 | 0.241740426 |
| Rrad | 124.3203132 | 181.9426084 | 66.69801794 | 0.366776637 | -1.447026349 | 0.000270427 | 0.014813745 | Down | 1.478028033 | 1.098351599 | 1.221220987 | 6.091119458 | 2.325583839 | 1.790911348 |
| Rtn4rl2 | 45.59368313 | 76.70115297 | 14.4862133 | 0.187708852 | -2.413431406 | 6.09061E-07 | 0.000119629 | Down | 0.13044282 | 0.079769111 | 0.14830574 | 1.009865945 | 0.482177502 | 0.382238005 |
| Runx1 | 70.03636323 | 98.79018724 | 41.28253921 | 0.419107529 | -1.254607655 | 0.000834373 | 0.034241375 | Down | 0.17785166 | 0.17976996 | 0.151384752 | 0.607031043 | 0.34036059 | 0.248735761 |
| Rwdd3 | 108.6045454 | 73.2549278 | 143.954163 | 1.96392283 | 0.973738242 | 0.000326959 | 0.017330126 | Up | 2.053297457 | 2.577567837 | 2.640129906 | 1.016490441 | 1.477321188 | 1.132193499 |
| S100a8 | 83.96194375 | 148.5036331 | 19.42025442 | 0.131445548 | -2.92746281 | 5.67812E-17 | 1.15777E-13 | Down | 2.054100055 | 1.556422631 | 0.895487152 | 13.67687147 | 10.21921095 | 9.957608818 |
| S100a9 | 147.5329893 | 274.1036093 | 20.96236939 | 0.076960112 | -3.6997453 | 3.06818E-38 | 1.4076E-34 | Down | 0.910610372 | 1.518713089 | 1.218011671 | 16.53269187 | 13.52121416 | 16.73291244 |
| Sall2 | 892.8432945 | 715.213413 | 1070.473176 | 1.496714876 | 0.581799414 | 0.000211312 | 0.012310422 | Up | 5.292709469 | 6.542230426 | 6.41706801 | 3.731044736 | 4.397972085 | 3.832283427 |
| Samd4 | 193.4279912 | 264.7785646 | 122.0774179 | 0.462375309 | -1.112863734 | 9.50552E-06 | 0.001132565 | Down | 0.209313271 | 0.380639583 | 0.278728336 | 0.655197853 | 0.66909978 | 0.517942483 |
| Scel | 240.4560594 | 329.5991558 | 151.3129631 | 0.458025826 | -1.126499149 | 0.000950483 | 0.037835827 | Down | 1.48578633 | 0.965476236 | 1.637484425 | 1.394636452 | 3.103658053 | 4.292983989 |
| Scn1b | 305.7633354 | 386.7634272 | 224.7632436 | 0.581662568 | -0.78174563 | 0.000207031 | 0.012138083 | Down | 3.379276016 | 3.585438773 | 3.421449248 | 7.392033077 | 5.483789055 | 4.677333301 |
| Sdf2l1 | 953.8456208 | 1207.377454 | 700.3137877 | 0.579660401 | -0.786720163 | 0.000892014 | 0.035976604 | Down | 23.49732265 | 12.04242618 | 21.65862197 | 38.53296262 | 29.35538412 | 29.49778639 |
| Sema7a | 369.4252065 | 461.9702803 | 276.8801328 | 0.599660517 | -0.73778211 | 0.000109882 | 0.00726173 | Down | 2.036135076 | 2.206032113 | 2.219744986 | 4.212246262 | 3.445291918 | 2.930916519 |
| Serpina3f | 24.61570684 | 43.3516783 | 5.879735374 | 0.134884235 | -2.890206357 | 6.52143E-06 | 0.000829037 | Down | 0.169297976 | 0.034751339 | 0.02787066 | 0.656676287 | 0.587456433 | 0.445214081 |
| Serpina3g | 284.6705958 | 503.4235535 | 65.91763809 | 0.13096398 | -2.932758028 | 2.85442E-42 | 1.74605E-38 | Down | 1.187897912 | 1.014916371 | 0.93661778 | 8.686775017 | 8.13181744 | 6.732812947 |
| Serpina3n | 36.55425826 | 70.2157536 | 2.892762925 | 0.041279505 | -4.598430503 | 1.30791E-09 | 5.58173E-07 | Down | 0.053517254 | 0.035702362 | 0.028633383 | 1.965276742 | 0.362119847 | 0.496603594 |
| Serpine1 | 118.4473246 | 193.8842278 | 43.0104214 | 0.221186557 | -2.176664388 | 4.07762E-12 | 3.75685E-09 | Down | 0.394477377 | 0.368428546 | 0.527643945 | 2.410749364 | 2.026612453 | 1.281168299 |
| Serpine2 | 890.1890898 | 1073.5342 | 706.8439795 | 0.658266227 | -0.603256915 | 0.000203053 | 0.011943018 | Down | 8.50903913 | 7.682924818 | 8.930337625 | 14.59902071 | 11.30276907 | 11.65188853 |
| Serpinh1 | 6239.587727 | 8154.200328 | 4324.975125 | 0.53041809 | -0.914798116 | 1.9467E-07 | 4.58E-05 | Down | 58.57713353 | 55.46836392 | 55.52231062 | 131.1873285 | 101.7307164 | 81.16862382 |
| Sfrp4 | 33.76021629 | 56.0922966 | 11.42813598 | 0.202536117 | -2.303748896 | 5.69717E-07 | 0.00011364 | Down | 0.220279753 | 0.150720769 | 0.217581176 | 1.188765769 | 0.832304121 | 0.827548901 |
| Sgk1 | 3012.551792 | 4016.725814 | 2008.377771 | 0.500051885 | -0.999850299 | 6.10627E-06 | 0.000789127 | Down | 12.29334952 | 16.46604461 | 15.21149525 | 38.2260527 | 18.44172396 | 29.88633746 |
| Sh3pxd2b | 230.2068422 | 291.177608 | 169.2360763 | 0.582033549 | -0.780825781 | 6.18745E-05 | 0.00469198 | Down | 0.651232239 | 0.775864878 | 0.612390992 | 1.159502874 | 1.048461668 | 1.237511983 |
| Skida1 | 189.2763216 | 120.6970065 | 257.8556367 | 2.130697737 | 1.091325945 | 8.97905E-05 | 0.006411458 | Up | 1.648663435 | 1.466472344 | 1.679230095 | 0.548867078 | 0.557011767 | 1.109362851 |
| Sla | 120.7874612 | 157.5224277 | 84.05249472 | 0.532101444 | -0.910226776 | 0.000565053 | 0.025540116 | Down | 0.399631353 | 0.319113989 | 0.442208531 | 0.801471059 | 0.569038472 | 0.776260276 |
| Slc10a2 | 2907.475908 | 3502.211898 | 2312.739917 | 0.660332022 | -0.598736485 | 9.90963E-05 | 0.006785507 | Down | 20.18562352 | 16.02772323 | 15.17532897 | 26.2935912 | 23.08672487 | 27.22004292 |
| Slc10a6 | 48.21592395 | 76.89582902 | 19.53601888 | 0.252053787 | -1.988196466 | 1.08781E-05 | 0.001255491 | Down | 0.238460687 | 0.198851989 | 0.446543409 | 1.633736064 | 0.717121563 | 1.09181864 |
| Slc16a3 | 30.00533716 | 48.7479905 | 11.26268381 | 0.230929947 | -2.114472824 | 2.20219E-05 | 0.002149598 | Down | 0.138029492 | 0.079443346 | 0.06081768 | 0.329313686 | 0.496486609 | 0.356884688 |
| Slc22a13 | 2013.966721 | 2427.428345 | 1600.505098 | 0.659277858 | -0.601041466 | 0.000397827 | 0.019677942 | Down | 17.22558078 | 12.43614683 | 12.48887754 | 20.88358315 | 22.38439463 | 19.58882913 |
| Slc22a21 | 134.0954713 | 89.62663323 | 178.5643094 | 1.992111775 | 0.994298597 | 0.000327696 | 0.017330126 | Up | 0.586803705 | 0.664958906 | 0.933272716 | 0.444986108 | 0.290086303 | 0.345473784 |
| Slc22a7 | 4515.239756 | 5795.750543 | 3234.72897 | 0.558081489 | -0.841452299 | 1.3496E-06 | 0.000219173 | Down | 42.27453072 | 45.89000575 | 58.22690531 | 99.6368738 | 85.82711495 | 72.36711036 |
| Slc2a1 | 1696.660072 | 2066.667554 | 1326.65259 | 0.641924049 | -0.639525484 | 0.00063453 | 0.027923896 | Down | 16.16774795 | 13.8469789 | 14.90888066 | 29.29031093 | 17.50005895 | 22.1676962 |
| Slc35f3 | 600.2862243 | 385.4213599 | 815.1510888 | 2.114217339 | 1.080123692 | 7.15923E-08 | 1.90404E-05 | Up | 1.768271984 | 2.136209549 | 2.390953185 | 0.813666342 | 1.20626295 | 0.898240642 |
| Slc38a2 | 3533.114126 | 4295.123574 | 2771.104679 | 0.645190392 | -0.632203141 | 1.32338E-05 | 0.001462972 | Down | 15.94710319 | 18.67231259 | 19.41125144 | 31.22612913 | 24.71593908 | 26.37538875 |
| Slc39a14 | 1540.538645 | 1961.84869 | 1119.228601 | 0.570695328 | -0.809207341 | 5.62646E-07 | 0.000113463 | Down | 3.105414858 | 3.795484677 | 3.073137139 | 6.318735645 | 4.625563041 | 6.237603273 |
| Slc5a3 | 8433.455405 | 10817.6152 | 6049.295606 | 0.559249781 | -0.838435309 | 2.13004E-06 | 0.000323045 | Down | 13.16911736 | 21.51220281 | 15.87553711 | 26.70284035 | 28.55270216 | 33.34716471 |
| Slc6a12 | 67.51844895 | 101.3413857 | 33.69551224 | 0.333515156 | -1.584175773 | 1.21652E-06 | 0.000199325 | Down | 0.391114619 | 0.373985173 | 0.240647158 | 0.94321743 | 0.891949334 | 1.136536668 |
| Slc7a1 | 393.5947113 | 521.1750745 | 266.0143481 | 0.511165049 | -0.968138901 | 2.1919E-06 | 0.000329701 | Down | 0.917428535 | 1.366066541 | 1.003328654 | 2.290456338 | 1.697520959 | 2.333062109 |
| Slc7a5 | 88.27052771 | 130.7764647 | 45.76459075 | 0.350744586 | -1.511507259 | 1.11084E-06 | 0.000191563 | Down | 0.322588844 | 0.445512229 | 0.417861562 | 1.414472221 | 1.063727767 | 0.845781832 |
| Slc7a9 | 4628.133779 | 4035.958736 | 5220.308821 | 1.293443582 | 0.371217127 | 0.001369742 | 0.049972446 | Up | 67.71214499 | 69.95127109 | 69.40700275 | 52.34563055 | 53.6857946 | 51.21848906 |
| Slco4a1 | 525.7072799 | 692.8009874 | 358.6135724 | 0.517429541 | -0.950565673 | 0.000362209 | 0.0184636 | Down | 3.033069007 | 2.353478099 | 3.409576084 | 8.276665104 | 3.695433421 | 4.806364621 |
| Slfn4 | 29.74175914 | 49.35940768 | 10.12411061 | 0.203845333 | -2.294453166 | 9.71746E-05 | 0.006729253 | Down | 0.08211449 | 0.059760125 | 0.087867575 | 0.400966677 | 0.127212788 | 0.583323581 |
| Slitrk6 | 341.8911223 | 493.5517616 | 190.230483 | 0.385259959 | -1.376095843 | 3.08914E-06 | 0.000436067 | Down | 1.609262663 | 0.842578331 | 0.662311706 | 2.059047007 | 2.643665859 | 3.259416571 |
| Slx4 | 1477.0737 | 1802.481184 | 1151.666216 | 0.638847388 | -0.646456764 | 0.000545599 | 0.024906166 | Down | 3.3774947 | 3.673488718 | 4.475471638 | 7.253474948 | 4.620765917 | 5.895262539 |
| Snx29 | 6793.978648 | 5268.600951 | 8319.356346 | 1.578990333 | 0.659002339 | 2.81026E-05 | 0.002553023 | Up | 24.82554131 | 31.31261325 | 26.38755473 | 14.59148788 | 16.25840132 | 20.47236434 |
| Socs3 | 321.8638911 | 561.0040878 | 82.72369438 | 0.147017426 | -2.765940928 | 4.40536E-24 | 1.1549E-20 | Down | 0.884195338 | 0.728226261 | 1.133036186 | 8.67533584 | 4.46455421 | 5.235246401 |
| Spns3 | 365.416747 | 262.3650581 | 468.4684359 | 1.784720655 | 0.835698281 | 0.001076619 | 0.0419451 | Up | 8.127560793 | 3.923549531 | 6.233761672 | 3.848494614 | 3.145485665 | 3.115209524 |
| Spsb1 | 140.133579 | 188.6180105 | 91.6491475 | 0.48736002 | -1.036940188 | 2.67613E-05 | 0.002467822 | Down | 0.721634366 | 0.810805561 | 0.593369618 | 1.723649806 | 1.279256461 | 1.291026875 |
| Sqle | 2574.657422 | 3320.295221 | 1829.019624 | 0.550808546 | -0.860377152 | 6.65675E-06 | 0.000836699 | Down | 24.63502605 | 16.65168318 | 19.09140215 | 44.02824164 | 30.50421923 | 33.50765979 |
| Srcin1 | 1638.340054 | 1283.489104 | 1993.191004 | 1.552708211 | 0.63478674 | 1.35541E-05 | 0.001489404 | Up | 3.598073001 | 4.391575742 | 4.383694987 | 2.360252494 | 2.707156533 | 2.755138102 |
| Srd5a2 | 674.7492399 | 477.4855133 | 872.0129665 | 1.825770643 | 0.868505542 | 4.1477E-05 | 0.003441094 | Up | 8.262472231 | 7.804607575 | 5.891292874 | 2.859223507 | 4.650150262 | 4.281174099 |
| Ssh2 | 752.0187197 | 898.0399873 | 605.997452 | 0.675244397 | -0.566518332 | 0.000442635 | 0.02126387 | Down | 0.636544534 | 0.764227213 | 0.599034868 | 1.022373024 | 0.833095088 | 1.05561592 |
| Stat3 | 2578.066024 | 3256.145299 | 1899.986749 | 0.583620617 | -0.776897246 | 1.40638E-05 | 0.001527127 | Down | 11.00599597 | 13.95239943 | 12.63020657 | 26.85768347 | 17.36782195 | 19.0631582 |
| Stc1 | 229.5773518 | 336.218982 | 122.9357216 | 0.366364807 | -1.448647171 | 4.87269E-05 | 0.003820289 | Down | 0.478052199 | 1.467020851 | 1.05719378 | 2.890927174 | 3.522227431 | 1.579837945 |
| Steap4 | 81.66266559 | 113.5320561 | 49.79327506 | 0.437177389 | -1.193709308 | 0.000262778 | 0.014481182 | Down | 0.427392368 | 0.46464237 | 0.548803475 | 0.749603892 | 1.028235846 | 1.456486066 |
| Sting1 | 203.4196278 | 282.9994386 | 123.8398171 | 0.437517506 | -1.192587352 | 2.54795E-05 | 0.002385586 | Down | 1.920727116 | 1.355386766 | 1.548323466 | 5.249659052 | 2.669884531 | 2.951745054 |
| Stip1 | 4919.161092 | 6059.20663 | 3779.115553 | 0.623706053 | -0.681061834 | 4.39115E-08 | 1.29971E-05 | Down | 54.56705889 | 54.79938029 | 48.8003971 | 77.59801218 | 83.21899962 | 88.3007245 |
| Stx11 | 72.25265532 | 110.7424646 | 33.76284602 | 0.30284569 | -1.723345217 | 6.45061E-07 | 0.000122595 | Down | 0.160716155 | 0.182983266 | 0.316436229 | 0.591948464 | 0.773313347 | 0.766075879 |
| Syvn1 | 2510.554029 | 3250.872336 | 1770.235723 | 0.544519854 | -0.876943443 | 1.19736E-07 | 2.96928E-05 | Down | 17.46676286 | 13.1768329 | 13.08249239 | 29.81858532 | 23.62486126 | 25.61133278 |
| Tacstd2 | 1321.879939 | 1991.750193 | 652.0096852 | 0.327449319 | -1.610656464 | 3.27305E-11 | 2.22458E-08 | Down | 9.907017548 | 12.24085045 | 11.48756245 | 49.77788181 | 28.40364435 | 22.70599026 |
| Tagln | 1726.733033 | 2210.67679 | 1242.789276 | 0.562263624 | -0.830681381 | 4.40694E-07 | 9.08672E-05 | Down | 26.17459372 | 23.41588739 | 21.63007485 | 47.11964695 | 42.99527538 | 34.29078796 |
| Tbc1d30 | 42.13785347 | 23.90383478 | 60.37187216 | 2.516694994 | 1.331530382 | 0.001310544 | 0.048649258 | Up | 0.110637643 | 0.160671443 | 0.144966259 | 0.04207662 | 0.040741224 | 0.079396575 |
| Tbxas1 | 405.3602991 | 224.9517926 | 585.7688056 | 2.60267021 | 1.379992516 | 7.59716E-10 | 3.57476E-07 | Up | 0.397190995 | 0.542941169 | 0.472337102 | 0.12724298 | 0.223221104 | 0.180484412 |
| Tcf21 | 545.2455729 | 328.2012978 | 762.2898479 | 2.32051056 | 1.214442263 | 2.03544E-09 | 7.94733E-07 | Up | 18.35961885 | 15.88649786 | 20.91833058 | 6.230592516 | 9.440527944 | 7.665716137 |
| Tenm4 | 93.83128942 | 64.27084248 | 123.3917364 | 1.91640729 | 0.938404207 | 0.000592871 | 0.026536026 | Up | 0.189102964 | 0.15610439 | 0.165957632 | 0.085004806 | 0.075006856 | 0.102321452 |
| Tent5b | 112.3042026 | 154.4509895 | 70.15741565 | 0.452978044 | -1.14248697 | 3.41256E-05 | 0.002996363 | Down | 1.081847309 | 0.707228222 | 0.9902733 | 2.357528267 | 1.829239826 | 1.846070626 |
| Tet1 | 52.04371934 | 27.6895974 | 76.39784128 | 2.74110199 | 1.454756008 | 0.00049631 | 0.023258114 | Up | 0.121731073 | 0.124159658 | 0.131996562 | 0.023129627 | 0.037421635 | 0.07451273 |
| Tgfbi | 731.4476176 | 951.5797207 | 511.3155146 | 0.537537127 | -0.895563691 | 0.00029147 | 0.015731645 | Down | 5.634967664 | 5.774354134 | 5.712407443 | 15.65317725 | 8.401432388 | 7.274383446 |
| Thbs1 | 2320.580713 | 2949.882799 | 1691.278628 | 0.573511116 | -0.802106646 | 6.9979E-06 | 0.000867693 | Down | 7.669805828 | 10.26963071 | 8.403614039 | 18.8051849 | 12.53463622 | 13.76787786 |
| Them4 | 942.2617344 | 1100.685757 | 783.8377119 | 0.712168775 | -0.489708912 | 0.000270007 | 0.014813745 | Down | 11.38426492 | 12.69859209 | 12.4929626 | 17.36031077 | 16.19760156 | 16.90390704 |
| Tinagl1 | 2029.878777 | 2568.150208 | 1491.607346 | 0.580870109 | -0.783712503 | 4.63015E-06 | 0.000615709 | Down | 23.32324365 | 19.98966244 | 19.00042206 | 43.25741001 | 31.00833638 | 31.27259737 |
| Tipin | 178.1557245 | 130.2265168 | 226.0849322 | 1.735304608 | 0.79518893 | 0.00013772 | 0.008775357 | Up | 3.16278566 | 2.946086795 | 3.2391238 | 1.755823814 | 1.877792768 | 1.657357836 |
| Tlr2 | 142.7539775 | 183.8815214 | 101.6264335 | 0.552224945 | -0.856672037 | 0.000275811 | 0.015063732 | Down | 0.876866171 | 0.916660049 | 1.006013398 | 1.575592096 | 1.91204792 | 1.483417151 |
| Tmem119 | 437.5836324 | 572.6753003 | 302.4919645 | 0.527891121 | -0.921687695 | 5.12303E-05 | 0.003983586 | Down | 4.983564193 | 3.111174385 | 3.996023475 | 9.412372704 | 6.854233986 | 6.29345831 |
| Tmem252 | 6246.605933 | 8363.008906 | 4130.202959 | 0.493818735 | -1.017946523 | 3.16054E-05 | 0.002809251 | Down | 62.8549549 | 31.59087721 | 57.35588265 | 131.467982 | 87.65720642 | 84.47855817 |
| Tmem45a | 72.42791858 | 104.4526228 | 40.4032144 | 0.386901538 | -1.369961632 | 8.21212E-05 | 0.005933094 | Down | 0.414561108 | 0.314972797 | 0.332704491 | 1.278103943 | 0.709930618 | 0.717065251 |
| Tnfaip8 | 8417.985598 | 6522.68017 | 10313.29103 | 1.580995148 | 0.66083294 | 0.000355294 | 0.018270832 | Up | 74.01027474 | 56.00990703 | 83.94218694 | 36.70824365 | 48.98128991 | 47.55410341 |
| Tnfrsf12a | 1616.411554 | 2789.890797 | 442.932311 | 0.15876699 | -2.655017109 | 0.000749407 | 0.031614644 | Down | 12.82521577 | 14.29426399 | 14.61664493 | 179.3096097 | 53.53219576 | 25.65830375 |
| Tpm1 | 3494.201225 | 4231.188928 | 2757.213521 | 0.651693701 | -0.617734045 | 0.000189671 | 0.011305835 | Down | 15.44089399 | 15.0565623 | 14.92075334 | 27.81524471 | 22.25059554 | 18.40271992 |
| Trib1 | 656.566055 | 902.0771284 | 411.0549816 | 0.455690483 | -1.133873855 | 3.36973E-06 | 0.00046704 | Down | 2.740765321 | 2.984765386 | 3.551051612 | 9.743981712 | 5.212690914 | 5.07925096 |
| Tril | 420.7847774 | 250.3507468 | 591.2188079 | 2.357934842 | 1.237523852 | 4.89592E-08 | 1.40106E-05 | Up | 3.267226846 | 3.307192857 | 3.454442955 | 0.921304564 | 1.433933618 | 1.821287167 |
| Trp53inp2 | 6262.740651 | 7258.706769 | 5266.774533 | 0.725592011 | -0.462769523 | 4.03558E-05 | 0.003397106 | Down | 26.49866828 | 28.36615958 | 27.13686629 | 37.99684936 | 35.39187821 | 37.66266999 |
| Tsc22d3 | 1712.787731 | 2279.363141 | 1146.212321 | 0.502897943 | -0.991662441 | 1.3013E-11 | 1.08546E-08 | Down | 8.957101936 | 8.572542767 | 8.31039213 | 19.36977656 | 14.60643853 | 16.57330871 |
| Tspan5 | 1033.779248 | 1222.370418 | 845.1880774 | 0.691710386 | -0.531759977 | 0.000382897 | 0.01915655 | Down | 1.865285997 | 1.810962853 | 1.499664057 | 2.52671752 | 2.538046287 | 2.282838189 |
| Ttc22 | 155.5037571 | 94.73706769 | 216.2704465 | 2.28128051 | 1.189843854 | 1.16965E-05 | 0.001333188 | Up | 2.542914994 | 2.423466033 | 2.514565853 | 0.808876594 | 1.502147195 | 0.898175648 |
| Tuba1c | 1486.30382 | 1825.730691 | 1146.876949 | 0.628184228 | -0.670740373 | 0.000157052 | 0.009736705 | Down | 20.27386249 | 16.08786013 | 16.31913846 | 33.58398589 | 23.21134695 | 25.78503405 |
| Tubb2a | 1126.312337 | 1526.536982 | 726.087692 | 0.475637276 | -1.072066311 | 6.82246E-06 | 0.000851694 | Down | 16.33092154 | 11.62097456 | 13.04674679 | 40.76719447 | 21.83991042 | 22.35030889 |
| Tubb2b | 387.1440792 | 524.579485 | 249.7086734 | 0.476400437 | -1.069753359 | 5.92587E-09 | 2.01381E-06 | Down | 4.220456396 | 4.057697947 | 3.536543148 | 9.558988011 | 7.186000198 | 7.653750919 |
| Tubb6 | 289.9504697 | 432.3476658 | 147.5532736 | 0.341323028 | -1.550790342 | 8.92861E-07 | 0.000157547 | Down | 2.394007199 | 2.418446095 | 2.872803445 | 12.09044313 | 5.708163255 | 4.359436505 |
| Ucp2 | 3072.591552 | 3783.593806 | 2361.589299 | 0.624178108 | -0.679970338 | 0.000104477 | 0.007045836 | Down | 27.62878766 | 37.83900331 | 41.30149237 | 64.56971523 | 52.58370936 | 50.86118837 |
| Ugt8a | 3759.011728 | 4635.65014 | 2882.373317 | 0.62176435 | -0.685560196 | 9.61355E-05 | 0.006682509 | Down | 12.20151707 | 11.89645444 | 9.933119167 | 14.14321112 | 17.4309921 | 22.22540264 |
| Usp2 | 2788.129186 | 3554.495311 | 2021.763062 | 0.568890221 | -0.813777813 | 1.4486E-09 | 5.90741E-07 | Down | 9.47900658 | 11.19323355 | 10.07379512 | 19.49226224 | 15.89670896 | 17.71441442 |
| Uvssa | 542.4836646 | 440.8069024 | 644.1604267 | 1.460681879 | 0.546642009 | 0.001110096 | 0.042887086 | Up | 1.980804105 | 2.203920631 | 2.588549636 | 1.577432476 | 1.407922599 | 1.574124029 |
| Vangl2 | 50.81327541 | 27.74423822 | 73.88231259 | 2.660948639 | 1.411940664 | 0.000725675 | 0.031017302 | Up | 0.185832171 | 0.251123016 | 0.367111199 | 0.086183738 | 0.139713026 | 0.069813592 |
| Vcam1 | 659.3693313 | 928.9580172 | 389.7806453 | 0.419178281 | -1.254364128 | 1.3576E-15 | 2.07611E-12 | Down | 3.536922702 | 3.130449961 | 3.747160214 | 8.427712587 | 8.269954339 | 7.715347024 |
| Vcan | 59.33565726 | 91.42329169 | 27.24802282 | 0.300609322 | -1.734038349 | 6.55061E-06 | 0.000829037 | Down | 0.042537002 | 0.081077803 | 0.045517219 | 0.224261151 | 0.198988692 | 0.130582192 |
| Vim | 1659.610299 | 2154.701326 | 1164.519272 | 0.540495014 | -0.887646786 | 4.14749E-05 | 0.003441094 | Down | 19.90334099 | 18.02206199 | 19.74918924 | 49.14353799 | 30.10691086 | 25.73072439 |
| Vstm5 | 202.3295204 | 140.8982049 | 263.7608359 | 1.870549383 | 0.903462054 | 2.48299E-05 | 0.002336686 | Up | 3.185265917 | 2.916293558 | 3.271095193 | 1.777800137 | 1.309953278 | 1.846249943 |
| Wdr1 | 4054.84865 | 4660.884749 | 3448.812552 | 0.739976899 | -0.434447862 | 0.001218574 | 0.045917984 | Down | 25.0450669 | 24.28801584 | 23.5573822 | 36.44585589 | 28.5813209 | 31.85915115 |
| Wdr19 | 312.1590379 | 223.3939681 | 400.9241078 | 1.792576301 | 0.842034528 | 0.000404846 | 0.019917775 | Up | 1.949544511 | 2.240443858 | 1.972932013 | 0.866975711 | 0.914019583 | 1.599182336 |
| Wdr86 | 54.57958944 | 28.56189748 | 80.5972814 | 2.809345118 | 1.490233865 | 6.26728E-05 | 0.004732957 | Up | 0.867112888 | 0.909019963 | 0.762174281 | 0.192366908 | 0.269044699 | 0.423485045 |
| Wnt7b | 219.4160548 | 299.6918839 | 139.1402256 | 0.464501022 | -1.106246323 | 1.38944E-05 | 0.001517712 | Down | 0.871370593 | 0.997385725 | 0.997472933 | 2.680444672 | 1.354247119 | 2.045348496 |
| Xlr3b | 199.884535 | 123.9989128 | 275.7701571 | 2.229126372 | 1.156478407 | 0.00025732 | 0.014266086 | Up | 5.159404109 | 4.059718347 | 2.699771497 | 2.641387818 | 1.435073917 | 1.190663514 |
| Ypel2 | 1504.163038 | 1899.433747 | 1108.892329 | 0.58365522 | -0.77681171 | 2.83312E-06 | 0.000404442 | Down | 3.4589332 | 2.593555351 | 3.065115996 | 5.800026533 | 4.908458621 | 4.666667932 |
| Ywhag | 3118.348995 | 3641.681078 | 2595.016912 | 0.712745008 | -0.488542065 | 0.000128087 | 0.008247451 | Down | 21.51171235 | 24.12673614 | 20.11374017 | 32.05398345 | 29.24583745 | 29.27569431 |
| Zbtb16 | 792.3372551 | 1446.541307 | 138.1332029 | 0.09547621 | -3.388714887 | 4.41289E-09 | 1.65267E-06 | Down | 0.913821425 | 0.335456341 | 0.271623712 | 6.455530063 | 3.882279366 | 5.408692176 |
| Zbtb25 | 137.8131942 | 95.09230189 | 180.5340866 | 1.894348791 | 0.921701987 | 0.000117391 | 0.00763917 | Up | 0.439774556 | 0.367468167 | 0.413545215 | 0.177734958 | 0.222648433 | 0.232135263 |
| Zbtb37 | 603.0362593 | 483.8338609 | 722.2386577 | 1.49276884 | 0.577990777 | 0.001078856 | 0.0419451 | Up | 0.90008963 | 1.241284662 | 1.035580485 | 0.645675246 | 0.632316605 | 0.811659706 |
| Zbtb40 | 802.2393996 | 1020.079343 | 584.3994566 | 0.572945071 | -0.803531263 | 1.22934E-05 | 0.001392564 | Down | 2.870334118 | 2.406323805 | 1.89541557 | 3.795128298 | 3.82969221 | 4.68717978 |
| Zc3h6 | 106.9470475 | 51.09690253 | 162.7971925 | 3.179696663 | 1.668889142 | 2.72347E-10 | 1.5145E-07 | Up | 0.997230067 | 0.866033067 | 1.060783572 | 0.278139201 | 0.313501241 | 0.311239603 |
| Zeb2 | 884.1087212 | 705.4518839 | 1062.765559 | 1.505806257 | 0.590536159 | 9.28847E-05 | 0.006530752 | Up | 3.567015853 | 3.26679964 | 3.228428893 | 1.92781196 | 2.258166153 | 2.379422954 |
| Zer1 | 954.0668592 | 810.8405307 | 1097.293188 | 1.353177195 | 0.436350769 | 0.000925323 | 0.037075564 | Up | 5.097512316 | 5.026778513 | 5.056361327 | 3.716928585 | 3.658384192 | 3.648974223 |
| Zfp395 | 544.3026872 | 409.8284133 | 678.7769611 | 1.654774788 | 0.726634882 | 0.000154199 | 0.009592238 | Up | 5.282039709 | 4.270669268 | 4.251586193 | 2.298475686 | 2.536992153 | 3.372159857 |
| Zfp462 | 370.7343924 | 291.5504438 | 449.9183411 | 1.543576102 | 0.626276613 | 0.000896448 | 0.036076119 | Up | 0.251766692 | 0.344710179 | 0.30889997 | 0.174837813 | 0.214059574 | 0.186048078 |
| Zfp648 | 63.54215897 | 98.60003398 | 28.48428396 | 0.291823694 | -1.776831071 | 0.000234239 | 0.013185622 | Down | 0.166715661 | 0.514661119 | 0.178396053 | 1.58026492 | 0.678314816 | 0.64179261 |
| Zfp661 | 200.1542929 | 153.4848919 | 246.8236939 | 1.608601115 | 0.685806625 | 0.001287752 | 0.047937621 | Up | 0.65283062 | 0.863112605 | 0.72079628 | 0.448892149 | 0.395625441 | 0.521726352 |
| Zkscan7 | 749.5266162 | 594.2011973 | 904.852035 | 1.522731696 | 0.606661762 | 3.6004E-05 | 0.003116557 | Up | 5.402280415 | 5.904842039 | 5.100308576 | 3.342071161 | 3.342187703 | 3.900990978 |
| Zmat1 | 162.2380437 | 115.654367 | 208.8217205 | 1.800322999 | 0.848255766 | 0.001104787 | 0.0428269 | Up | 1.719218869 | 1.680639804 | 2.012708669 | 0.718382282 | 0.912889712 | 1.321810985 |
| Zyx | 1453.575295 | 1719.425612 | 1187.724977 | 0.69085708 | -0.533540809 | 0.001237203 | 0.046524394 | Down | 8.166732321 | 8.073390739 | 8.332109249 | 13.78188951 | 11.67763006 | 9.482244818 |
